# Supplementary material for: A Gaussian process-based definition reveals new and bona fide genetic interactions compared to a multiplicative model in the Gram-negative Escherichia coli
Source: Oxford University Press journal article supplement (doi:10.1093/bioinformatics/btz673), 2019-08-23
Supplement: bioinformatics_36_3_880_s3.zip [file bioinformatics_36_3_880_s3.zip]

Archive with 9 entries (9 files):
- Table S4-July 15-2019-Finalized.xlsx
- Table S5-July 15-2019-Finalized.xlsx
- WEKA-script.rar
- Supplementary Figure 1.pdf
- Supplementary Figure 2.pdf
- Supplementary material-July 24-2019-Finalized.pdf
- Table S1-July 15-2019-Finalized.xlsb
- Table S2-July 15-2019-Finalized.xlsx
- Table S3-July 15-2019-Finalized-binary.xlsb
