# Supplementary material for: A Gaussian process-based definition reveals new and bona fide genetic interactions compared to a multiplicative model in the Gram-negative Escherichia coli
Source: Oxford University Press journal article supplement (doi:10.1093/bioinformatics/btz673), 2019-08-23
Supplement: bioinformatics_36_3_880_s3.zip [file bioinformatics_36_3_880_s3.zip › Supplementary Figure 1.pdf]

A

| Testing of selected definition (or model) | Training gene pairs |       |
|-------------------------------------------|---------------------|-------|
|                                           | RMSE                | MAE   |
| <b>A. Predefined models</b>               |                     |       |
| Multiplicative (Multi)                    | 0.171               | 0.106 |
| Minimum (Min)                             | 0.067               | 0.051 |
| Logarithmic (Log)                         | 0.174               | 0.109 |
| Additive (Add)                            | 0.186               | 0.123 |
| <b>B. Machine learning models</b>         |                     |       |
| Gaussian process (GP)                     | 0.061               | 0.049 |
| Linear regression (LR)                    | 0.135               | 0.106 |
| Neural network (NN)                       | 0.090               | 0.072 |
| Support vector regression (SVR)           | 0.142               | 0.100 |

RMSE: root mean square error; MAE: mean absolute error

B

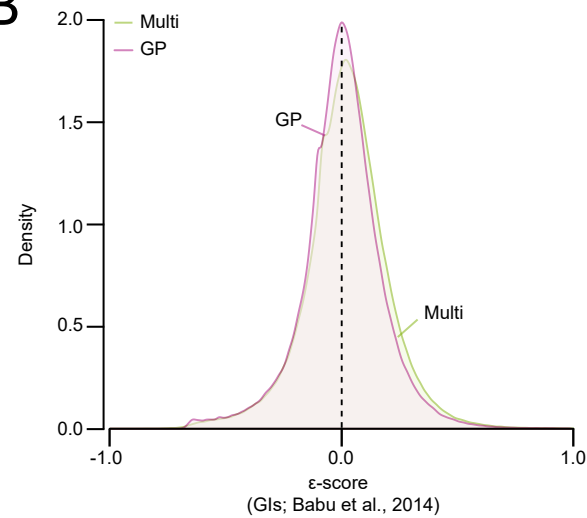

C

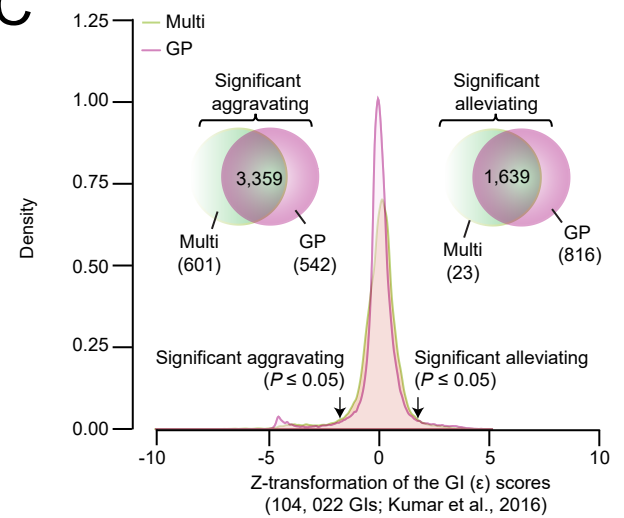

D

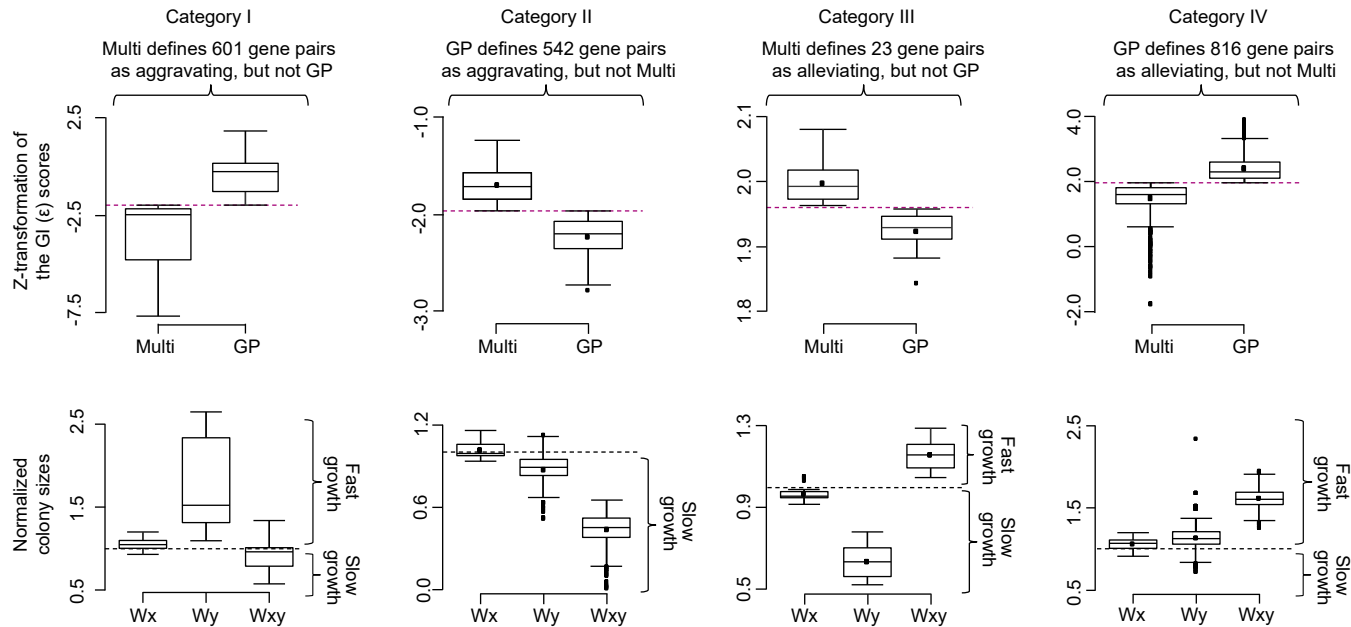

E

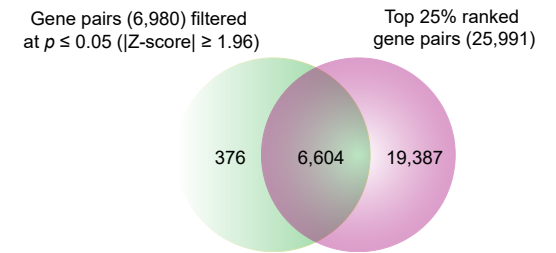

**Supplementary Fig. 1.** Comparison of error metrics, and distributions of GI score for gene pairs between GP and multiplicative models. **(A)** Error metrics shown for indicated definition is evaluated using the non-interacting training pairs from a genome-wide GI study (Babu et al., 2014). **(B, C)** Histogram of *E. coli* GI  $\epsilon$ -scores (Babu et al., 2014; panel B) or Z-transformation of GI ( $\epsilon$ ) score distribution (panel C) for gene pairs from GP and multiplicative models showing a normal Gaussian distribution centered on zero (dotted line), and arrows (panel C) indicate statistical thresholds (corresponding to two standard deviations;  $|Z\text{-score}| \geq 1.96$ ;  $p \leq 0.05$ ) to define significant GI pairs. The overlap of aggravating or alleviating GIs between GP and the multiplicative model is shown as a Venn diagram (C) in the inset. **(D)** Box plots showing the distribution of Z-transformed GI ( $\epsilon$ ) scores (dotted line shows the  $|Z\text{-score}| \geq 1.96$  cut-off) for disagreement gene pairs (grouped under various categories) between GP and the multiplicative definitions, and their respective normalized single (Wx: donor; Wy: recipient) and double (Wxy) mutant colony sizes that exhibit slow ( $< 1.0$ ), normal ( $1.0$ ), and fast ( $> 1.0$ ) growth. **(E)** Venn diagram showing the overlap between the significant Z-transformed GI pairs in the 95th percentile ( $p \leq 0.05$ ) and in the top 25% of the ranked GI pairs.
