# Supplementary material for: A Gaussian process-based definition reveals new and bona fide genetic interactions compared to a multiplicative model in the Gram-negative Escherichia coli
Source: Oxford University Press journal article supplement (doi:10.1093/bioinformatics/btz673), 2019-08-23
Supplement: bioinformatics_36_3_880_s3.zip [file bioinformatics_36_3_880_s3.zip › Table S2-July 15-2019-Finalized.xlsx]

## Sheet: Training_data
Table S2. List of training (336; Sheet 1), and test (400 interacting, Sheet 2; 400 non-interacting, Sheet 3) gene pairs and their predicted GI (ε) scores based on observed and expected mutant fitness.
Bnum1	Gene1	Bnum2	Gene2	Observed Actual Fitness			Expected Mutant Fitness								GI score (ε; Observed-Expected)
				Wx	Wy	Wxy	Min	Add	Multi	Log	LR	SVR	NN	GP	εMin	εAdd	εMulti	εLog	εLR	εSVR	εNN	εGP
b0258	ykfC	b1360	ydaV	0.998515	0.953236	0.915503	0.953236	0.951751	0.95182	0.9518	0.925266	0.933104	1.00029	0.95791	-0.037733	-0.036248	-0.0363174	-0.0362969	-0.009763	-0.017601	-0.084786	-0.042407
b4062	soxS	b0712	ybgK	0.963168	1.24575	1.01527	0.963168	1.20891	1.19986	1.20306	1.05905	1.04525	1.03887	1.0158	0.052101	-0.193644	-0.184593	-0.187789	-0.043779	-0.029978	-0.023598	-0.000528
b1833	yebS	b2964	nupG	0.97178	0.783234	0.833943	0.783234	0.755014	0.761131	0.759627	0.821941	0.842963	0.828549	0.823092	0.050709	0.078929	0.0728119	0.0743162	0.012002	-0.00902	0.005394	0.010851
b0760	modF	b2945	endA	0.883252	0.885904	0.973228	0.883252	0.769156	0.782476	0.779129	0.827726	0.842131	0.880804	0.883783	0.089976	0.204072	0.190752	0.194099	0.145502	0.131097	0.092424	0.089445
b0147	thpR	b3043	ygiL	0.968774	0.967027	0.980156	0.967027	0.935801	0.936831	0.936531	0.916389	0.923567	0.997084	0.952063	0.013129	0.044355	0.0433254	0.0436254	0.063767	0.056589	-0.016928	0.028093
b0214	rnhA	b4200	rpsF	0.9762	0.570805	0.56574	0.570805	0.547005	0.55722	0.555296	0.713291	0.750302	0.577992	0.641141	-0.005065	0.018735	0.00852016	0.0104442	-0.147551	-0.184562	-0.012252	-0.075401
b4170	mutL	b1238	tdk	0.995354	1.32983	0.918848	0.995354	1.32518	1.32365	1.32423	1.12041	1.09984	1.04049	1.02092	-0.076506	-0.406335	-0.404803	-0.405384	-0.201561	-0.180995	-0.121637	-0.102074
b0760	modF	b0981	etk	0.883252	0.810967	0.94347	0.810967	0.694219	0.716288	0.711144	0.788555	0.80862	0.777293	0.834925	0.132503	0.249251	0.227182	0.232326	0.154915	0.13485	0.166177	0.108545
b0393	rdgC	b4209	ytfE	0.988747	1.1067	1.08003	0.988747	1.09545	1.09425	1.09464	1.0002	0.996575	1.03249	1.01561	0.091278	-0.015425	-0.0142243	-0.0146194	0.079822	0.08345	0.047539	0.06442
b0090	murG	b1510	ydeK	1.0594	1.18159	1.14692	1.0594	1.24099	1.25177	1.24785	1.07756	1.06737	1.03898	1.06135	0.087523	-0.094065	-0.104851	-0.100931	0.06936	0.079552	0.107938	0.085568
b0789	clsB	b4526	ydaE	0.952414	0.891252	0.83879	0.891252	0.843666	0.848841	0.847449	0.867931	0.881043	0.939476	0.899592	-0.052462	-0.004876	-0.0100509	-0.00865877	-0.029141	-0.042253	-0.100686	-0.060802
b0086	murF	b2755	cas1	1.02363	1.04067	0.947881	1.02363	1.0643	1.06526	1.06495	0.984552	0.985463	1.02763	1.01307	-0.075745	-0.116415	-0.117376	-0.117066	-0.036671	-0.037582	-0.079752	-0.065185
b1350	recE	b0708	phr	0.966743	0.732693	0.792999	0.732693	0.699436	0.708326	0.706268	0.792799	0.817703	0.750091	0.778446	0.060306	0.093563	0.0846732	0.0867308	0.0002	-0.024704	0.042908	0.014553
b0093	ftsQ	b0183	rnhB	1.06472	1.02394	0.990377	1.02394	1.08866	1.09021	1.0897	0.998034	0.99968	1.02935	1.02932	-0.033563	-0.098284	-0.0998334	-0.0993252	-0.007657	-0.009303	-0.038976	-0.038945
b0229	lfhA	b2304	yfcH	0.980701	0.936105	1.0755	0.936105	0.916806	0.918039	0.917686	0.906676	0.916037	0.986049	0.939357	0.139392	0.158691	0.157458	0.157811	0.168821	0.15946	0.089448	0.13614
b0148	hrpB	b4308	yjhR	0.995036	0.943644	1.01373	0.943644	0.93868	0.93896	0.938878	0.91837	0.926977	0.994986	0.950559	0.070088	0.075052	0.0747722	0.0748539	0.095362	0.086755	0.018746	0.063173
b1352	kilR	b3023	ygiV	1.00634	0.966425	1.07756	0.966425	0.972766	0.972553	0.972617	0.936393	0.943134	1.00743	0.969318	0.111137	0.104796	0.105009	0.104945	0.141169	0.134428	0.07013	0.108244
b0090	murG	b0624	crcB	1.0594	1.07433	1.05183	1.0594	1.13373	1.13814	1.13664	1.02149	1.0194	1.03404	1.04362	-0.007572	-0.0819	-0.0863149	-0.0848191	0.030331	0.032423	0.017787	0.008202
b0393	rdgC	b3361	fic	0.988747	1.02248	1.02751	0.988747	1.01123	1.01098	1.01105	0.956179	0.958912	1.01974	0.987946	0.038767	0.016285	0.016538	0.0164597	0.071335	0.068602	0.007771	0.039568
b3537	bcsF	b0397	sbcC	1.00298	1.05826	0.956918	1.00298	1.06124	1.06141	1.06136	0.982578	0.982426	1.02804	1.0087	-0.046064	-0.10432	-0.104494	-0.104438	-0.02566	-0.025508	-0.071121	-0.051787
b0948	rlmL	b3813	uvrD	0.993741	1.34034	1.06812	0.993741	1.33408	1.33195	1.33276	1.12503	1.10369	1.04056	1.01833	0.074378	-0.265964	-0.263834	-0.264645	-0.056914	-0.035574	0.027563	0.049793
b0246	yafW	b0981	etk	1.00993	0.810967	0.830459	0.810967	0.820893	0.819017	0.819507	0.857071	0.875508	0.899307	0.862574	0.019492	0.009566	0.0114423	0.0109515	-0.026612	-0.045049	-0.068848	-0.032115
b0089	ftsW	b0708	phr	0.945021	0.732693	0.983983	0.732693	0.677714	0.69241	0.689077	0.78105	0.806233	0.727782	0.774338	0.25129	0.306269	0.291573	0.294906	0.202933	0.17775	0.256201	0.209645
b3383	yhfZ	b0544	ybcK	1.04872	1.00762	0.955231	1.00762	1.05634	1.05672	1.0566	0.980851	0.983936	1.02525	1.01328	-0.052389	-0.101114	-0.101485	-0.101366	-0.02562	-0.028705	-0.070023	-0.058047
b0147	thpR	b2823	ppdC	0.968774	0.990092	1.02659	0.968774	0.958866	0.959175	0.959084	0.928445	0.933882	1.00631	0.963988	0.057812	0.06772	0.0674106	0.0675025	0.098141	0.092704	0.020273	0.062598
b0472	recR	b3014	yqhH	1.00263	1.12751	0.949205	1.00263	1.13014	1.13047	1.13036	1.01859	1.01321	1.03496	1.02675	-0.053421	-0.180935	-0.18127	-0.181157	-0.069384	-0.064005	-0.085751	-0.077543
b0262	afuC	b1055	yceA	0.978728	1.28869	1.01349	0.978728	1.26742	1.26128	1.26353	1.08991	1.07267	1.03991	1.0194	0.03476	-0.253931	-0.24779	-0.250039	-0.076425	-0.05918	-0.026426	-0.005913
b0252	yafZ	b2113	mrp	1.00775	0.993044	1.06572	0.993044	1.00079	1.00074	1.00076	0.951069	0.955782	1.01585	0.983918	0.07268	0.064931	0.0649849	0.0649684	0.114655	0.109942	0.049872	0.081806
b4504	ykfH	b3813	uvrD	0.991296	1.34034	1.08188	0.991296	1.33164	1.32868	1.3298	1.12371	1.1024	1.04054	1.01725	0.090588	-0.249754	-0.246792	-0.247918	-0.041826	-0.020518	0.041341	0.064635
b0760	modF	b1633	nth	0.883252	1.06431	0.906427	0.883252	0.947561	0.940053	0.94225	0.920983	0.921912	1.01073	0.963408	0.023175	-0.041134	-0.0336261	-0.0358228	-0.014556	-0.015485	-0.104299	-0.056981
b0148	hrpB	b0014	dnaK	0.995036	1.0606	1.07137	0.995036	1.05563	1.05533	1.05543	0.979504	0.979277	1.02756	1.00554	0.076338	0.015741	0.0160418	0.0159455	0.09187	0.092097	0.043814	0.065833
b0396	araJ	b2304	yfcH	0.987742	0.936105	0.956429	0.936105	0.923847	0.92463	0.924404	0.910485	0.919755	0.988723	0.942539	0.020324	0.032582	0.0317988	0.0320247	0.045944	0.036674	-0.032294	0.01389
b0147	thpR	b2358	yfdO	0.968774	0.929747	1.00637	0.929747	0.898521	0.900715	0.900095	0.896902	0.906896	0.977428	0.930439	0.076625	0.107851	0.105657	0.106277	0.10947	0.099476	0.028944	0.075933
b0472	recR	b0939	elfD	1.00263	0.884848	0.851807	0.884848	0.887474	0.887172	0.887256	0.891742	0.904692	0.963509	0.915721	-0.033041	-0.035667	-0.0353646	-0.035449	-0.039935	-0.052885	-0.111702	-0.063914
b0890	ftsK	b2758	casC	1.06262	0.895221	1.05966	0.895221	0.957838	0.951277	0.953215	0.929611	0.941008	0.994922	0.958461	0.164434	0.101817	0.108378	0.10644	0.130044	0.118647	0.064733	0.101194
b0981	etk	b0397	sbcC	1.00651	1.05826	1.08833	1.00651	1.06476	1.06514	1.06502	0.984485	0.984288	1.02839	1.01049	0.081822	0.023566	0.0231869	0.0233091	0.103844	0.104041	0.059939	0.077838
b0689	ybfP	b4348	hsdS	0.98937	0.830828	0.861542	0.830828	0.820198	0.821996	0.821525	0.856334	0.873535	0.905146	0.868722	0.030714	0.041344	0.0395457	0.0400172	0.005208	-0.011993	-0.043604	-0.00718
b0183	rnhB	b2676	nrdF	0.997626	1.01846	1.09112	0.997626	1.01609	1.01605	1.01606	0.958881	0.961803	1.02026	0.990557	0.09349	0.075027	0.0750708	0.0750572	0.132235	0.129313	0.070853	0.100559
b0393	rdgC	b1440	ydcS	0.988747	0.71396	0.698621	0.71396	0.702707	0.705926	0.705182	0.794908	0.820944	0.745724	0.769033	-0.015339	-0.004086	-0.00730481	-0.00656118	-0.096287	-0.122323	-0.047103	-0.070412
b0085	murE	b4378	yjjV	1.19361	0.693316	1.20587	0.693316	0.886927	0.82755	0.843361	0.894924	0.919887	0.914297	0.920309	0.51255	0.318939	0.378316	0.362505	0.310942	0.285979	0.291569	0.285557
b1731	cedA	b2954	rdgB	1.15936	0.944648	1.21271	0.944648	1.10401	1.09519	1.09809	1.00777	1.01419	1.02777	1.04938	0.26806	0.108702	0.117523	0.114615	0.204934	0.198515	0.184937	0.163326
b0760	modF	b4526	ydaE	0.883252	0.891252	0.927735	0.883252	0.774504	0.7872	0.783993	0.830522	0.844523	0.887315	0.886978	0.044483	0.153231	0.140535	0.143742	0.097213	0.083212	0.04042	0.040757
b0398	sbcD	b1860	ruvB	0.991938	1.12922	0.958195	0.991938	1.12116	1.12012	1.12047	1.0137	1.00833	1.03454	1.02182	-0.033743	-0.162966	-0.161924	-0.162273	-0.055506	-0.050136	-0.076345	-0.063623
b2912	fau	b0711	ybgJ	0.98187	1.2328	1.03765	0.98187	1.21467	1.21045	1.21195	1.0624	1.04933	1.03888	1.02479	0.055781	-0.177023	-0.172802	-0.174302	-0.024748	-0.011684	-0.001226	0.012858
b2900	yqfB	b3386	rpe	0.987801	0.649508	0.628939	0.649508	0.637309	0.641585	0.640674	0.760706	0.791622	0.658514	0.711413	-0.020569	-0.00837	-0.0126457	-0.011735	-0.131767	-0.162683	-0.029575	-0.082474
b2171	yeiP	b0543	emrE	0.956898	0.782894	0.791116	0.782894	0.739792	0.74915	0.74688	0.813714	0.834953	0.812969	0.818593	0.008222	0.051324	0.0419663	0.0442361	-0.022598	-0.043837	-0.021853	-0.027477
b0229	lfhA	b1183	umuD	0.980701	0.933695	0.984635	0.933695	0.914396	0.915676	0.915309	0.905416	0.914959	0.984726	0.937881	0.05094	0.070239	0.0689594	0.0693255	0.079219	0.069676	-9.1e-05	0.046754
b2900	yqfB	b0797	rhlE	0.987801	0.671831	0.745991	0.671831	0.659632	0.663635	0.662758	0.772374	0.801605	0.686365	0.731192	0.07416	0.086359	0.0823557	0.0832333	-0.026383	-0.055614	0.059626	0.014799
b0760	modF	b0490	fetA	0.883252	1.0289	0.942689	0.883252	0.912151	0.908777	0.909737	0.902473	0.906077	0.997425	0.952355	0.059437	0.030538	0.0339119	0.0329516	0.040216	0.036612	-0.054736	-0.009666
b0090	murG	b0397	sbcC	1.0594	1.05826	1.13257	1.05826	1.11765	1.12111	1.11995	1.01309	1.01222	1.03268	1.03873	0.074316	0.014919	0.0114588	0.0126179	0.11948	0.120357	0.099897	0.093841
b0396	araJ	b2933	cmtA	0.987742	0.939601	0.932576	0.939601	0.927343	0.928083	0.927869	0.912312	0.921318	0.990512	0.944666	-0.007025	0.005233	0.00449263	0.00470678	0.020264	0.011258	-0.057936	-0.01209
b0091	murC	b2933	cmtA	0.956838	0.939601	0.93719	0.939601	0.896439	0.899046	0.898311	0.895597	0.905	0.978241	0.931832	-0.002411	0.040751	0.0381441	0.038879	0.041593	0.03219	-0.041051	0.005358
b0258	ykfC	b3584	yiaT	0.998515	1.02196	1.08809	0.998515	1.02047	1.02044	1.02045	0.961188	0.963835	1.02116	0.992503	0.089576	0.067619	0.0676516	0.0676414	0.126903	0.124256	0.066934	0.095588
b0760	modF	b0981	etk	0.883252	0.810967	0.875764	0.810967	0.694219	0.716288	0.711144	0.788555	0.80862	0.777293	0.834925	0.064797	0.181545	0.159476	0.16462	0.087209	0.067144	0.098471	0.040839
b0549	ybcO	b4200	rpsF	0.980724	0.570805	0.522815	0.570805	0.551529	0.559802	0.558237	0.715738	0.75269	0.580183	0.642145	-0.04799	-0.028714	-0.0369872	-0.035422	-0.192923	-0.229875	-0.057368	-0.11933
b0890	ftsK	b0712	ybgK	1.06262	1.24575	1.09484	1.06262	1.30836	1.32375	1.31793	1.11284	1.09776	1.04013	1.06201	0.032225	-0.21352	-0.228908	-0.223086	-0.017996	-0.002916	0.054708	0.032834
b0760	modF	b0014	dnaK	0.883252	1.0606	0.893984	0.883252	0.943849	0.936774	0.938838	0.919043	0.920252	1.00953	0.962364	0.010732	-0.049865	-0.0427904	-0.0448545	-0.025059	-0.026268	-0.115549	-0.06838
b1755	ynjC	b1848	yebG	0.981759	0.561404	0.561205	0.561404	0.543163	0.551163	0.54967	0.711384	0.749033	0.574438	0.634789	-0.000199	0.018042	0.0100416	0.0115348	-0.150179	-0.187828	-0.013233	-0.073584
b4143	groL	b1626	ydgK	1.11065	1.01245	1.00352	1.01245	1.1231	1.12448	1.12402	1.01687	1.0188	1.03178	1.05095	-0.008928	-0.119579	-0.120957	-0.120494	-0.013348	-0.015272	-0.028261	-0.047426
b3385	gph	b2964	nupG	1.0073	0.783234	0.734774	0.783234	0.790529	0.788948	0.789349	0.841151	0.861717	0.86299	0.837987	-0.04846	-0.055755	-0.0541737	-0.0545748	-0.106377	-0.126943	-0.128216	-0.103213
b4143	groL	b2136	yohD	1.11065	1.0697	1.11698	1.0697	1.18035	1.18806	1.18536	1.04679	1.04439	1.03614	1.06931	0.047279	-0.063372	-0.0710839	-0.0683866	0.070181	0.072581	0.080833	0.047664
b0383	phoA	b1630	rsxD	0.994431	0.781211	0.806137	0.781211	0.775642	0.77686	0.776555	0.833136	0.85402	0.848089	0.830105	0.024926	0.030495	0.0292766	0.0295816	-0.026999	-0.047883	-0.041952	-0.023968
b0229	lfhA	b1913	uvrC	0.980701	1.0292	0.943015	0.980701	1.0099	1.00933	1.00951	0.955337	0.957666	1.01996	0.986942	-0.037686	-0.066882	-0.0663185	-0.0664927	-0.012322	-0.014651	-0.076945	-0.043927
b0875	aqpZ	b1848	yebG	0.99024	0.561404	0.57719	0.561404	0.551644	0.555925	0.555119	0.715971	0.753511	0.578414	0.637171	0.015786	0.025546	0.0212653	0.0220709	-0.138781	-0.176321	-0.001224	-0.059981
b4143	groL	b1034	ycdX	1.11065	1.10371	1.00985	1.10371	1.21436	1.22584	1.22173	1.06458	1.05961	1.03771	1.07679	-0.093859	-0.20451	-0.215986	-0.211879	-0.054723	-0.049754	-0.02786	-0.066935
b0190	yaeQ	b1961	dcm	0.962066	1.10153	0.975831	0.962066	1.0636	1.05974	1.06098	0.983068	0.980173	1.02988	1.00197	0.013765	-0.087765	-0.0839136	-0.0851506	-0.007237	-0.004342	-0.054051	-0.026135
b0442	ybaV	b1848	yebG	0.966497	0.561404	0.550784	0.561404	0.527901	0.542595	0.539893	0.703129	0.740974	0.567766	0.632076	-0.01062	0.022883	0.00818872	0.0108906	-0.152345	-0.19019	-0.016982	-0.081292
b0059	hepA	b3281	aroE	0.941868	0.827383	0.834018	0.827383	0.769251	0.779286	0.776771	0.828841	0.846913	0.85959	0.850625	0.006635	0.064767	0.0547324	0.0572471	0.005177	-0.012895	-0.025572	-0.016607
b0089	ftsW	b2823	ppdC	0.945021	0.990092	0.981406	0.945021	0.935113	0.935658	0.935499	0.915563	0.915257	1.07036	0.956882	0.036385	0.046293	0.0457483	0.0459069	0.065843	0.066149	-0.088957	0.024524
b3537	bcsF	b3158	yhbU	1.00298	1.03142	1.10677	1.00298	1.0344	1.0345	1.03447	0.971234	0.965469	1.09614	1.00137	0.103792	0.072371	0.0722773	0.0723068	0.13554	0.141305	0.010633	0.105408
b3263	yhdU	b1238	tdk	0.985495	1.32983	1.01955	0.985495	1.31532	1.31054	1.31234	1.12415	1.0942	1.11906	1.01101	0.034055	-0.295774	-0.29099	-0.292792	-0.104596	-0.074653	-0.099507	0.008537
b0229	lfhA	b1350	recE	0.980701	0.885036	0.916386	0.885036	0.865737	0.867956	0.867348	0.878594	0.885769	1.0215	0.906755	0.03135	0.050649	0.0484303	0.0490383	0.037792	0.030617	-0.105109	0.009631
b0085	murE	b4504	ykfH	1.19361	0.820135	1.23846	0.820135	1.01375	0.978922	0.989486	0.964786	0.969913	1.069	1.01547	0.418328	0.224717	0.259541	0.248977	0.273677	0.26855	0.16946	0.222992
b0252	yafZ	b3158	yhbU	1.00775	1.03142	1.00729	1.00775	1.03917	1.03941	1.03934	0.973957	0.968026	1.09685	1.00388	-0.000457	-0.031878	-0.0321215	-0.0320445	0.033335	0.039266	-0.089556	0.003417
b3700	recF	b3386	rpe	0.983394	0.649508	0.661923	0.649508	0.632902	0.638722	0.637488	0.751557	0.778204	0.731914	0.701315	0.012415	0.029021	0.0232007	0.0244353	-0.089634	-0.116281	-0.069991	-0.039392
b0089	ftsW	b0148	hrpB	0.945021	0.919554	1.0458	0.919554	0.864575	0.868998	0.867785	0.877056	0.88261	1.02954	0.917456	0.126243	0.181222	0.176799	0.178012	0.168741	0.163187	0.016257	0.128341
b0760	modF	b1115	ycfT	0.883252	0.868895	0.963487	0.868895	0.752147	0.767453	0.763669	0.814116	0.826037	0.940111	0.875569	0.094592	0.21134	0.196034	0.199818	0.149371	0.13745	0.023376	0.087918
b4143	groL	b2002	yeeS	1.11065	1.11879	1.01806	1.11065	1.22944	1.24259	1.23784	1.08043	1.06365	1.11516	1.08316	-0.092586	-0.211376	-0.22452	-0.21977	-0.062368	-0.045584	-0.097098	-0.065093
b4206	ytfB	b3386	rpe	0.964906	0.649508	0.666508	0.649508	0.614414	0.626714	0.62415	0.740996	0.768289	0.715918	0.697011	0.017	0.052094	0.0397938	0.0423579	-0.074488	-0.101781	-0.04941	-0.030503
b2954	rdgB	b3813	uvrD	0.976373	1.34034	0.980993	0.976373	1.31671	1.30867	1.3117	1.12467	1.09418	1.11912	1.00453	0.00462	-0.335722	-0.327681	-0.330707	-0.143681	-0.113184	-0.138132	-0.023534
b0091	murC	b0632	dacA	0.956838	0.880437	1.02603	0.880437	0.837275	0.842436	0.841056	0.862452	0.870843	1.00417	0.894547	0.14559	0.188752	0.183591	0.184971	0.163575	0.155184	0.02186	0.13148
b0148	hrpB	b1963	yedR	0.995036	1.03657	0.923174	0.995036	1.03161	1.03143	1.03149	0.969507	0.963593	1.0961	0.999309	-0.071862	-0.108436	-0.108254	-0.108312	-0.046333	-0.040419	-0.172926	-0.076135
b1087	yceF	b4200	rpsF	0.995096	0.570805	0.594578	0.570805	0.565901	0.568006	0.567602	0.715278	0.748054	0.650007	0.633546	0.023773	0.028677	0.0265722	0.026976	-0.1207	-0.153476	-0.055429	-0.038968
b3261	fis	b0713	ybgL	1.01543	1.03644	0.987668	1.01543	1.05187	1.05243	1.05225	0.981083	0.974467	1.09897	1.00997	-0.027757	-0.0642	-0.0647621	-0.0645827	0.006585	0.013201	-0.111302	-0.022302
b2109	yehB	b3813	uvrD	0.95683	1.34034	1.03656	0.95683	1.29717	1.28248	1.28793	1.11351	1.0837	1.11891	0.995646	0.079729	-0.260613	-0.24592	-0.251374	-0.076952	-0.047137	-0.082353	0.040913
b4143	groL	b1034	ycdX	1.11065	1.10371	1.03399	1.10371	1.21436	1.22584	1.22173	1.0722	1.05667	1.11431	1.08101	-0.069724	-0.180375	-0.191851	-0.187744	-0.038214	-0.022682	-0.080327	-0.047025
b0083	ftsL	b1195	ymgE	0.977665	0.954794	0.885535	0.954794	0.932459	0.933469	0.933175	0.914941	0.916427	1.06417	0.951243	-0.069259	-0.046924	-0.0479337	-0.0476403	-0.029406	-0.030892	-0.178638	-0.065708
b3267	yhdV	b0948	rlmL	0.947731	0.769576	0.763871	0.769576	0.717307	0.729351	0.726496	0.79673	0.814649	0.866637	0.803282	-0.005705	0.046564	0.03452	0.0373754	-0.032859	-0.050778	-0.102766	-0.039411
b4062	soxS	b4200	rpsF	0.963168	0.570805	0.614297	0.570805	0.533973	0.549781	0.546841	0.697039	0.730931	0.630181	0.626499	0.043492	0.080324	0.0645159	0.0674556	-0.082742	-0.116634	-0.015884	-0.012202
b0081	mraZ	b0760	modF	0.974165	0.951069	1.01659	0.951069	0.925234	0.926498	0.926133	0.910908	0.912826	1.06114	0.947537	0.065516	0.091351	0.0900869	0.090452	0.105677	0.103759	-0.044559	0.069048
b0760	modF	b1441	ydcT	0.883252	1.03821	0.944864	0.883252	0.921466	0.917005	0.918284	0.906548	0.904403	1.0732	0.957399	0.061612	0.023398	0.0278594	0.0265802	0.038316	0.040461	-0.128341	-0.012535
b1432	ydcM	b0892	rarA	1.0252	1.02612	1.00819	1.0252	1.05131	1.05197	1.05176	0.981028	0.974928	1.09821	1.01125	-0.017007	-0.043122	-0.04378	-0.04357	0.027163	0.033263	-0.090016	-0.003059
b0094	ftsA	b0547	ybcN	0.933428	1.1165	0.986077	0.933428	1.04992	1.04217	1.04463	0.977945	0.967544	1.10344	0.993827	0.052649	-0.063848	-0.0560926	-0.0585529	0.008132	0.018533	-0.117364	-0.00775
b0502	ylbG	b2945	endA	0.979414	0.885904	0.963152	0.885904	0.865318	0.867667	0.867023	0.878332	0.88548	1.0215	0.906842	0.077248	0.097834	0.0954852	0.0961287	0.08482	0.077672	-0.058346	0.05631
b0246	yafW	b4349	hsdM	1.00993	1.01108	1.07601	1.00993	1.02101	1.02111	1.02108	0.964095	0.959778	1.09238	0.996389	0.066082	0.055003	0.054893	0.0549273	0.111913	0.11623	-0.016367	0.079619
b0760	modF	b1843	yobB	0.883252	0.875108	0.875088	0.875108	0.75836	0.772941	0.769314	0.817507	0.828913	0.947491	0.879511	-2e-05	0.116728	0.102147	0.105774	0.057581	0.046175	-0.072403	-0.004423
b3972	murB	b1860	ruvB	1.10857	1.12922	1.05162	1.10857	1.2378	1.25183	1.24673	1.08494	1.06736	1.11562	1.08336	-0.056951	-0.186174	-0.200204	-0.195107	-0.033319	-0.015741	-0.063995	-0.031734
b0148	hrpB	b1158	pinE	0.995036	0.955864	1.04245	0.955864	0.9509	0.951119	0.951054	0.925448	0.926238	1.07008	0.960065	0.08659	0.091554	0.0913349	0.0913995	0.117006	0.116216	-0.027623	0.082389
b1432	ydcM	b0624	crcB	1.0252	1.07433	1.05142	1.0252	1.09953	1.1014	1.10078	1.00735	0.997243	1.10629	1.02809	0.026221	-0.048107	-0.0499799	-0.0493608	0.044071	0.054176	-0.054869	0.023332
b3584	yiaT	b3813	uvrD	0.991784	1.34034	1.0811	0.991784	1.33213	1.32933	1.33039	1.13348	1.10244	1.11928	1.01165	0.089313	-0.251029	-0.248233	-0.249296	-0.052381	-0.021345	-0.038179	0.069449
b0760	modF	b1115	ycfT	0.883252	0.868895	0.908696	0.868895	0.752147	0.767453	0.763669	0.814116	0.826037	0.940111	0.875569	0.039801	0.156549	0.141243	0.145027	0.09458	0.082659	-0.031415	0.033127
b0396	araJ	b2159	nfo	0.987742	0.96164	0.923554	0.96164	0.949382	0.949852	0.949714	0.924435	0.925	1.07046	0.959824	-0.038086	-0.025828	-0.0262982	-0.0261597	-0.000881	-0.001446	-0.14691	-0.03627
b2648	pinH	b1061	dinI	0.98182	1.2108	1.05578	0.98182	1.19262	1.18879	1.19013	1.05707	1.03714	1.11545	1.0237	0.073958	-0.136843	-0.133011	-0.134354	-0.001291	0.018635	-0.059667	0.03208
b4312	fimB	b1848	yebG	0.983829	0.561404	0.561121	0.561404	0.545233	0.552326	0.550999	0.703709	0.73766	0.634117	0.62178	-0.000283	0.015888	0.00879546	0.0101219	-0.142588	-0.176539	-0.072996	-0.060659
b0760	modF	b0262	afuC	0.883252	1.15036	0.956582	0.883252	1.03361	1.01606	1.02153	0.96777	0.956309	1.10347	0.979225	0.07333	-0.077032	-0.0594775	-0.0649459	-0.011188	0.000273	-0.146887	-0.022643
b0502	ylbG	b3652	recG	0.979414	0.739157	0.742396	0.739157	0.718571	0.723941	0.722674	0.798223	0.817561	0.853776	0.783742	0.003239	0.023825	0.0184553	0.0197219	-0.055827	-0.075165	-0.11138	-0.041346
b3972	murB	b3033	yqiB	1.10857	1.12029	1.16622	1.10857	1.22886	1.24193	1.23721	1.08007	1.06323	1.11517	1.08234	0.057647	-0.062645	-0.0757055	-0.0709877	0.086155	0.102991	0.051052	0.083878
b0086	murF	b1730	ydjO	1.02363	0.913495	0.940349	0.913495	0.937121	0.935077	0.935672	0.91865	0.921961	1.05888	0.948884	0.026854	0.003228	0.00527177	0.0046768	0.021699	0.018388	-0.118529	-0.008535
b0181	lpxA	b3145	yraK	0.984594	1.11038	0.951839	0.984594	1.09498	1.09328	1.09383	1.00383	0.992153	1.10742	1.01594	-0.032755	-0.143137	-0.141436	-0.141996	-0.051995	-0.040314	-0.155582	-0.064101
b0921	smtA	b3813	uvrD	0.978559	1.34034	1.03499	0.978559	1.3189	1.3116	1.31435	1.12592	1.09535	1.11915	1.00553	0.05643	-0.283912	-0.276615	-0.279365	-0.090934	-0.06036	-0.084159	0.029457
b3701	dnaN	b3813	uvrD	0.977777	1.34034	1.04398	0.977777	1.31812	1.31056	1.31341	1.12548	1.09493	1.11914	1.00517	0.0662	-0.274142	-0.266579	-0.269428	-0.081499	-0.050953	-0.075163	0.038805
b3362	yhfG	b3385	gph	0.959706	0.670797	0.71026	0.670797	0.630503	0.643768	0.640939	0.749647	0.775353	0.739031	0.715852	0.039463	0.079757	0.0664921	0.0693211	-0.039387	-0.065093	-0.028771	-0.005592
b0760	modF	b1864	yebC	0.883252	0.807942	0.842148	0.807942	0.691194	0.713616	0.708406	0.780842	0.797826	0.859735	0.833909	0.034206	0.150954	0.128532	0.133742	0.061306	0.044322	-0.017587	0.008239
b2894	xerD	b2230	yfaA	1.00921	1.05401	1.02593	1.00921	1.06323	1.06372	1.06356	0.987126	0.979268	1.10149	1.01305	0.016712	-0.037301	-0.0377987	-0.0376385	0.0388	0.046658	-0.075563	0.012878
b0383	phoA	b0981	etk	0.994431	0.810967	0.849832	0.810967	0.805398	0.806451	0.806179	0.846003	0.858851	0.959548	0.853882	0.038865	0.044434	0.0433813	0.043653	0.003829	-0.009019	-0.109716	-0.00405
b0543	emrE	b4203	rplI	0.982429	0.797102	0.779345	0.797102	0.779531	0.783096	0.782198	0.831578	0.845998	0.933789	0.836791	-0.017757	-0.000186	-0.00375112	-0.00285312	-0.052233	-0.066653	-0.154444	-0.057446
b0229	lfhA	b0925	ldtD	0.980701	1.16333	1.03769	0.980701	1.14403	1.14088	1.14195	1.03052	1.01457	1.11241	1.02162	0.056986	-0.106347	-0.103195	-0.104266	0.00717	0.023114	-0.074726	0.016064
b0093	ftsQ	b3996	nudC	1.06472	1.14976	1.00287	1.06472	1.21449	1.22418	1.22071	1.0711	1.05335	1.11517	1.0635	-0.061847	-0.211612	-0.221305	-0.217839	-0.068231	-0.050479	-0.112296	-0.060621
b0760	modF	b1750	ydjX	0.883252	0.976179	0.84313	0.883252	0.859431	0.862212	0.861454	0.872683	0.875691	1.04014	0.934007	-0.040122	-0.016301	-0.0190821	-0.0183241	-0.029553	-0.032561	-0.197007	-0.090877
b0760	modF	b0939	elfD	0.883252	0.884848	0.974832	0.883252	0.7681	0.781544	0.778169	0.822825	0.833421	0.958691	0.885566	0.09158	0.206732	0.193288	0.196663	0.152007	0.141411	0.016141	0.089266
b0702	ybfB	b0681	chiP	0.98935	1.1935	0.921759	0.98935	1.18285	1.18079	1.1815	1.05192	1.03317	1.1148	1.0274	-0.067591	-0.261087	-0.259026	-0.259745	-0.130165	-0.111413	-0.193039	-0.105639
b0094	ftsA	b2124	yehS	0.933428	0.900543	0.886494	0.900543	0.833971	0.840592	0.838825	0.860056	0.867594	1.00804	0.902004	-0.014049	0.052523	0.0459019	0.0476686	0.026438	0.0189	-0.121546	-0.01551
b0760	modF	b1758	ynjF	0.883252	1.10552	0.979923	0.883252	0.988776	0.976456	0.980173	0.943292	0.935556	1.09469	0.973601	0.096671	-0.008853	0.00346672	-0.000250494	0.036631	0.044367	-0.11477	0.006322
b0095	ftsZ	b3014	yqhH	1.1458	1.12751	1.13211	1.12751	1.27331	1.2919	1.28499	1.10527	1.08653	1.11663	1.09951	0.004592	-0.141204	-0.159795	-0.152887	0.026835	0.045572	0.01548	0.032595
b2892	recJ	b0711	ybgJ	0.986632	1.2328	1.06113	0.986632	1.21944	1.21632	1.21743	1.07183	1.04991	1.11657	1.0252	0.074503	-0.158301	-0.155189	-0.156298	-0.010694	0.011228	-0.05543	0.035938
b0890	ftsK	b0285	paoB	1.06262	1.03734	0.977088	1.03734	1.09995	1.10229	1.10152	1.00853	1.00019	1.10461	1.03723	-0.060248	-0.122865	-0.125203	-0.12443	-0.03144	-0.023101	-0.127522	-0.060145
b0438	clpX	b1115	ycfT	0.944899	0.868895	0.860796	0.868895	0.813794	0.821018	0.819127	0.849331	0.859098	0.985691	0.882763	-0.008099	0.047002	0.039778	0.0416686	0.011465	0.001698	-0.124895	-0.021967
b0091	murC	b3023	ygiV	0.956838	0.966425	0.917066	0.956838	0.923263	0.924712	0.924294	0.909393	0.910641	1.06302	0.949177	-0.039772	-0.006197	-0.00764616	-0.00722825	0.007673	0.006425	-0.145951	-0.032111
b0375	yaiV	b4233	mpl	0.986227	1.14735	1.05792	0.986227	1.13357	1.13155	1.13223	1.02495	1.01014	1.1114	1.02273	0.071689	-0.075659	-0.0736296	-0.0743147	0.032969	0.047778	-0.053483	0.035182
b0183	rnhB	b4056	yjbQ	0.997626	0.962598	0.937357	0.962598	0.960224	0.960313	0.960286	0.930603	0.930744	1.07369	0.965241	-0.025241	-0.022867	-0.0229558	-0.0229294	0.006754	0.006613	-0.136333	-0.027884
b0981	etk	b3839	tatC	1.00651	0.633461	1.07384	0.633461	0.639968	0.637583	0.638089	0.756	0.783173	0.73122	0.695669	0.440384	0.433877	0.436262	0.435756	0.317845	0.290672	0.342625	0.378176
b0090	murG	b0190	yaeQ	1.0594	1.19625	1.12075	1.0594	1.25564	1.2673	1.26302	1.09344	1.07201	1.11702	1.06262	0.061357	-0.134888	-0.146544	-0.14227	0.027316	0.048744	0.003732	0.058136
b0059	hepA	b1179	ycgL	0.941868	1.16188	1.01483	0.941868	1.10374	1.09433	1.09743	1.00754	0.993073	1.10997	1.00334	0.072959	-0.088917	-0.0795068	-0.0826072	0.007288	0.021754	-0.095142	0.01149
b0083	ftsL	b1238	tdk	0.977665	1.32983	1.0708	0.977665	1.30749	1.30013	1.30289	1.11967	1.09	1.11897	1.00738	0.093136	-0.236693	-0.229326	-0.232086	-0.048872	-0.019203	-0.04817	0.063424
b0890	ftsK	b2755	cas1	1.06262	1.04067	1.04863	1.04067	1.10329	1.10583	1.10499	1.01035	1.00173	1.1051	1.03842	0.007959	-0.054658	-0.0572046	-0.0563603	0.038281	0.046897	-0.05647	0.010204
b0147	thpR	b3780	rhlB	0.968774	0.883539	0.97736	0.883539	0.852313	0.85595	0.854964	0.875174	0.876339	0.89139	0.901955	0.093821	0.125047	0.12141	0.122396	0.102186	0.101021	0.08597	0.075405
b0419	yajO	b3385	gph	0.986863	0.670797	0.730639	0.670797	0.65766	0.661985	0.661039	0.771364	0.781812	0.666392	0.731475	0.059842	0.072979	0.0686543	0.0696003	-0.040725	-0.051173	0.064247	-0.000836
b1652	rnt	b0440	hupB	0.980237	0.761323	0.835154	0.761323	0.74156	0.746277	0.745136	0.816174	0.822613	0.775901	0.808951	0.073831	0.093594	0.088877	0.0900184	0.01898	0.012541	0.059253	0.026203
b0132	yadD	b2928	yggC	0.974925	1.10827	1.04546	0.974925	1.08319	1.08048	1.08136	0.999836	0.989802	0.976366	1.01318	0.070531	-0.037734	-0.0350193	-0.0359041	0.04562	0.055654	0.06909	0.032276
b0760	modF	b0958	sulA	0.883252	1.08067	0.862931	0.883252	0.963921	0.954503	0.957293	0.930519	0.926875	0.957682	0.979938	-0.020321	-0.10099	-0.0915721	-0.094362	-0.067588	-0.063944	-0.094751	-0.117007
b0081	mraZ	b1055	yceA	0.974165	1.28869	0.981531	0.974165	1.26286	1.2554	1.25812	1.09654	1.07783	0.987321	1.02414	0.007366	-0.281325	-0.273867	-0.27659	-0.115007	-0.096297	-0.00579	-0.042613
b0083	ftsL	b0517	allD	0.977665	0.930069	0.914323	0.930069	0.907734	0.909296	0.908851	0.90551	0.903937	0.925665	0.936532	-0.015746	0.006589	0.00502709	0.0054715	0.008813	0.010386	-0.011342	-0.022209
b4143	groL	b4058	uvrA	1.11065	0.94974	1.00344	0.94974	1.06039	1.05483	1.05661	0.995101	0.985242	0.967145	1.03545	0.053695	-0.056956	-0.0513947	-0.053175	0.008334	0.018193	0.03629	-0.032013
b0094	ftsA	b3908	sodA	0.933428	1.01015	0.990724	0.933428	0.943577	0.942901	0.943099	0.922353	0.919349	0.94685	0.965101	0.057296	0.047147	0.0478226	0.0476247	0.068371	0.071375	0.043874	0.025623
b0065	yabI	b0398	sbcD	0.991809	0.906849	0.928033	0.906849	0.898658	0.899421	0.899206	0.901409	0.900177	0.918589	0.927851	0.021184	0.029375	0.028612	0.0288272	0.026624	0.027856	0.009444	0.000182
b0148	hrpB	b1413	hrpA	0.995036	0.853858	1.09515	0.853858	0.848894	0.849619	0.849424	0.874792	0.875943	0.883485	0.89151	0.241292	0.246256	0.245531	0.245726	0.220358	0.219207	0.211665	0.20364
b0421	ispA	b1350	recE	0.976678	0.885036	0.88477	0.885036	0.861714	0.864395	0.863663	0.880675	0.881332	0.896901	0.906049	-0.000266	0.023056	0.0203748	0.0211071	0.004095	0.003438	-0.012131	-0.021279
b0760	modF	b1749	xthA	0.883252	0.907314	0.95925	0.883252	0.790566	0.801387	0.798612	0.837173	0.841906	0.857086	0.904458	0.075998	0.168684	0.157863	0.160638	0.122077	0.117344	0.102164	0.054792
b4143	groL	b0246	yafW	1.11065	1.02454	1.08363	1.02454	1.13519	1.1379	1.13698	1.03538	1.0219	0.978387	1.06444	0.059093	-0.051558	-0.0542732	-0.0533532	0.048253	0.061727	0.105244	0.019188
b3972	murB	b0681	chiP	1.10857	1.1935	1.02825	1.10857	1.30207	1.32308	1.31514	1.12512	1.1036	0.987441	1.08559	-0.080324	-0.27382	-0.294828	-0.286888	-0.096873	-0.075349	0.040808	-0.05734
b3248	yhdE	b4200	rpsF	0.992278	0.570805	0.518562	0.570805	0.563083	0.566397	0.565763	0.720739	0.73572	0.561021	0.646771	-0.052243	-0.044521	-0.0478352	-0.0472012	-0.202177	-0.217158	-0.042459	-0.128209
b2566	era	b0681	chiP	1.19969	1.1935	1.0952	1.1935	1.39319	1.43183	1.41641	1.17925	1.1527	0.988577	1.11954	-0.098297	-0.297987	-0.336626	-0.321206	-0.08405	-0.0575	0.106622	-0.024342
b0231	dinB	b0550	rusA	0.9977	0.939971	0.960192	0.939971	0.937671	0.937809	0.937769	0.922744	0.919586	0.937803	0.95189	0.020221	0.022521	0.0223829	0.0224232	0.037448	0.040606	0.022389	0.008302
b2580	ung	b2109	yehB	0.991904	0.759035	0.737419	0.759035	0.750939	0.75289	0.752414	0.821873	0.827778	0.783768	0.812141	-0.021616	-0.01352	-0.0154709	-0.0149951	-0.084454	-0.090359	-0.046349	-0.074722
b0214	rnhA	b1843	yobB	0.9762	0.875108	0.969996	0.875108	0.851308	0.85428	0.853476	0.875045	0.876208	0.889172	0.898742	0.094888	0.118688	0.115716	0.11652	0.094951	0.093788	0.080824	0.071254
b0132	yadD	b3839	tatC	0.974925	0.633461	0.633126	0.633461	0.608386	0.617577	0.615684	0.744169	0.757079	0.611156	0.694041	-0.000335	0.02474	0.015549	0.017442	-0.111043	-0.123953	0.02197	-0.060915
b0247	ykfG	b2699	recA	0.976414	1.2244	0.980816	0.976414	1.20082	1.19553	1.19739	1.06326	1.04753	0.985306	1.02777	0.004402	-0.220003	-0.21471	-0.216573	-0.082442	-0.066714	-0.00449	-0.046951
b0760	modF	b2830	rppH	0.883252	0.863956	0.909641	0.863956	0.747208	0.763091	0.759183	0.813825	0.820654	0.811755	0.877432	0.045685	0.162433	0.14655	0.150458	0.095816	0.088987	0.097886	0.032209
b0229	lfhA	b1656	sodB	0.980701	0.915236	0.974477	0.915236	0.895937	0.897573	0.897112	0.899327	0.898302	0.918642	0.928322	0.059241	0.07854	0.0769041	0.0773648	0.07515	0.076175	0.055835	0.046155
b0760	modF	b2068	alkA	0.883252	0.922532	0.956104	0.883252	0.805784	0.814828	0.812477	0.845367	0.849365	0.870994	0.913255	0.072852	0.15032	0.141276	0.143627	0.110737	0.106739	0.08511	0.042849
b3972	murB	b0687	seqA	1.10857	0.952733	1.07539	0.952733	1.06131	1.05617	1.05782	0.995478	0.985588	0.967438	1.0352	0.122661	0.014088	0.0192199	0.0175756	0.079916	0.089806	0.107956	0.040199
b0875	aqpZ	b1238	tdk	0.99024	1.32983	1.05587	0.99024	1.32007	1.31685	1.31807	1.12824	1.10665	0.988313	1.02449	0.065631	-0.264198	-0.260979	-0.262195	-0.072367	-0.050782	0.067558	0.031381
b0640	holA	b3813	uvrD	0.981744	1.34034	0.984106	0.981744	1.32209	1.31587	1.31822	1.12885	1.10723	0.988372	1.02004	0.002362	-0.33798	-0.331767	-0.334114	-0.144746	-0.123122	-0.004266	-0.035934
b0252	yafZ	b1808	yoaA	1.00775	1.02758	0.938606	1.00775	1.03533	1.03555	1.03548	0.975891	0.967945	0.967348	1.00164	-0.069143	-0.096728	-0.0969418	-0.0968744	-0.037285	-0.029339	-0.028742	-0.063034
b0760	modF	b0711	ybgJ	0.883252	1.2328	0.842267	0.883252	1.11606	1.08888	1.09782	1.01244	1.00144	0.981818	0.999941	-0.040985	-0.273789	-0.24661	-0.255553	-0.170172	-0.159176	-0.139551	-0.157674
b0297	eaeH	b0279	yagM	0.99361	0.903177	0.908057	0.903177	0.896787	0.897406	0.897231	0.900501	0.899348	0.917217	0.926263	0.00488	0.01127	0.0106513	0.0108255	0.007556	0.008709	-0.00916	-0.018206
b0760	modF	b0454	atl	0.883252	0.813896	0.80449	0.813896	0.697148	0.718875	0.713795	0.78687	0.796118	0.750966	0.843095	-0.009406	0.107342	0.0856147	0.0906954	0.01762	0.008372	0.053524	-0.038605
b2964	nupG	b3386	rpe	0.981494	0.649508	0.622718	0.649508	0.631002	0.637488	0.636115	0.756711	0.768484	0.635348	0.710377	-0.02679	-0.008284	-0.0147702	-0.0133968	-0.133993	-0.145766	-0.01263	-0.087659
b0184	dnaE	b3681	glvG	0.991345	1.14077	1.08622	0.991345	1.13212	1.1309	1.13131	1.0271	1.01459	0.980931	1.02653	0.094879	-0.045895	-0.0446766	-0.0450877	0.059129	0.071639	0.105293	0.059694
b2602	yfiL	b3385	gph	1.00363	0.670797	0.690798	0.670797	0.674428	0.673233	0.673498	0.781325	0.790848	0.682297	0.739903	0.020001	0.01637	0.0175653	0.0172998	-0.090527	-0.10005	0.008501	-0.049105
b0065	yabI	b4056	yjbQ	0.991809	0.962598	0.945186	0.962598	0.954407	0.954713	0.954623	0.931428	0.927502	0.945351	0.962152	-0.017412	-0.009221	-0.00952736	-0.00943672	0.013758	0.017684	-0.000165	-0.016966
b3972	murB	b3145	yraK	1.10857	1.11038	1.20215	1.10857	1.21896	1.23094	1.22664	1.08037	1.06286	0.984608	1.08182	0.093576	-0.016806	-0.0287905	-0.0244892	0.121782	0.139289	0.217541	0.120333
b0890	ftsK	b4349	hsdM	1.06262	1.01108	0.965987	1.01108	1.0737	1.07439	1.07416	0.999596	0.989422	0.971829	1.02723	-0.045092	-0.107709	-0.108403	-0.108178	-0.033609	-0.023435	-0.005842	-0.061241
b3972	murB	b1332	ynaJ	1.10857	1.10875	1.04563	1.10857	1.21732	1.22913	1.2249	1.07949	1.06206	0.984528	1.0816	-0.062947	-0.171699	-0.183507	-0.179273	-0.033864	-0.016435	0.061098	-0.035979
b0702	ybfB	b3442	yhhZ	0.98935	1.10827	0.965324	0.98935	1.09762	1.09647	1.09685	1.00841	0.997578	0.977639	1.01913	-0.024026	-0.132298	-0.131145	-0.131525	-0.043084	-0.032254	-0.012315	-0.053811
b3638	yicR	b1238	tdk	0.980995	1.32983	1.05462	0.980995	1.31082	1.30456	1.30691	1.12275	1.10167	0.98821	1.02142	0.07363	-0.256199	-0.249931	-0.252284	-0.068121	-0.047046	0.066415	0.033202
b2962	yggX	b4203	rplI	0.981309	0.797102	0.738533	0.797102	0.778411	0.782203	0.781249	0.836076	0.840727	0.818921	0.839788	-0.058569	-0.039878	-0.0436704	-0.0427161	-0.097543	-0.102194	-0.080388	-0.101255
b0090	murG	b2230	yfaA	1.0594	1.05401	1.02509	1.05401	1.11341	1.11662	1.11555	1.0208	1.00873	0.977419	1.04048	-0.028927	-0.088324	-0.0915322	-0.0904607	0.004284	0.016355	0.047667	-0.015397
b0925	ldtD	b1034	ycdX	0.982099	1.10371	1.00316	0.982099	1.08581	1.08395	1.08456	1.00164	0.991436	0.976465	1.01497	0.021058	-0.082653	-0.0807965	-0.081403	0.001512	0.011721	0.026692	-0.011811
b0711	ybgJ	b3636	rpmG	0.981481	1.18772	1.05043	0.981481	1.1692	1.16573	1.16693	1.04652	1.03228	0.983675	1.02817	0.068947	-0.118777	-0.115301	-0.116501	0.003911	0.018146	0.066753	0.022259
b0760	modF	b1759	nudG	0.883252	0.890938	0.84988	0.883252	0.77419	0.786923	0.783708	0.828354	0.833879	0.840925	0.89458	-0.033372	0.07569	0.0629572	0.0661725	0.021526	0.016001	0.008955	-0.0447
b4378	yjjV	b3813	uvrD	0.989324	1.34034	1.05461	0.989324	1.32967	1.32603	1.32741	1.13335	1.11131	0.988448	1.02252	0.065286	-0.275056	-0.271423	-0.272802	-0.078745	-0.056703	0.066162	0.032094
b0760	modF	b4175	hflC	0.883252	1.08729	0.928445	0.883252	0.970543	0.960352	0.963386	0.934085	0.930121	0.95952	0.981689	0.045193	-0.042098	-0.031907	-0.0349409	-0.00564	-0.001676	-0.031075	-0.053244
b0267	yagA	b1458	yncI	0.948852	1.05184	1.05301	0.948852	1.00069	0.998041	0.998854	0.953964	0.948096	0.962975	0.986583	0.104161	0.05232	0.0549716	0.0541588	0.099049	0.104917	0.090038	0.06643
b3362	yhfG	b4200	rpsF	0.959706	0.570805	0.568155	0.570805	0.530511	0.547805	0.5446	0.701389	0.718167	0.54062	0.637871	-0.00265	0.037644	0.02035	0.0235551	-0.133234	-0.150012	0.027535	-0.069716
b2236	yfaE	b3813	uvrD	0.969391	1.34034	0.891066	0.969391	1.30973	1.29932	1.30322	1.12152	1.10057	0.988238	1.01611	-0.078325	-0.418667	-0.408249	-0.412151	-0.230449	-0.209505	-0.097172	-0.125044
b0245	ykfI	b3182	dacB	0.989701	1.00888	1.00963	0.989701	0.998584	0.998493	0.998521	0.955099	0.949053	0.959814	0.984733	0.019927	0.011044	0.0111355	0.0111074	0.054529	0.060575	0.049814	0.024895
b0179	lpxD	b1764	selD	0.973308	0.942195	1.05593	0.942195	0.915503	0.917046	0.916604	0.909452	0.907532	0.930255	0.942201	0.113734	0.140426	0.138883	0.139325	0.146477	0.148397	0.125674	0.113728
b4351	mrr	b3150	yraP	1.00148	1.00862	0.919185	1.00148	1.0101	1.01011	1.01011	0.961954	0.955271	0.962016	0.990256	-0.082297	-0.090914	-0.0909268	-0.0909228	-0.042769	-0.036086	-0.042831	-0.071071
b0089	ftsW	b2676	nrdF	0.945021	1.01846	1.02313	0.945021	0.963484	0.962469	0.962771	0.933716	0.929672	0.952776	0.97204	0.078108	0.059645	0.0606601	0.0603578	0.089413	0.093457	0.070353	0.051089
b0396	araJ	b2699	recA	0.987742	1.2244	0.938256	0.987742	1.21215	1.2094	1.21037	1.06999	1.05363	0.985652	1.032	-0.049486	-0.273891	-0.27114	-0.272117	-0.131731	-0.115378	-0.047396	-0.093747
b0760	modF	b0939	elfD	0.883252	0.884848	0.863321	0.883252	0.7681	0.781544	0.778169	0.825075	0.830895	0.834609	0.890802	-0.019931	0.095221	0.0817772	0.0851524	0.038246	0.032426	0.028712	-0.027481
b0089	ftsW	b1065	mdtH	0.945021	0.995046	0.908833	0.945021	0.940067	0.940339	0.94026	0.921107	0.918194	0.944381	0.961271	-0.036188	-0.031234	-0.0315064	-0.0314268	-0.012274	-0.009361	-0.035548	-0.052438
b3013	yqhG	b0711	ybgJ	0.990808	1.2328	0.936909	0.990808	1.22361	1.22147	1.22224	1.07633	1.0594	0.986051	1.03314	-0.053899	-0.286703	-0.284563	-0.285328	-0.139422	-0.122494	-0.049142	-0.096232
b0760	modF	b1114	mfd	0.883252	0.876457	0.885379	0.876457	0.759709	0.774132	0.77054	0.820557	0.826782	0.825644	0.885507	0.008922	0.12567	0.111247	0.114839	0.064822	0.058597	0.059735	-0.000128
b1335	ogt	b2109	yehB	0.98586	0.759035	0.756677	0.759035	0.744895	0.748302	0.747476	0.818282	0.824522	0.778253	0.809334	-0.002358	0.011782	0.00837475	0.00920126	-0.061605	-0.067845	-0.021576	-0.052657
b3068	mug	b4203	rplI	0.988112	0.797102	0.768275	0.797102	0.785214	0.787626	0.787015	0.840118	0.844393	0.824512	0.842784	-0.028827	-0.016939	-0.0193511	-0.0187405	-0.071843	-0.076118	-0.056237	-0.074509
b0472	recR	b3281	aroE	1.00263	0.827383	0.796381	0.827383	0.830009	0.829556	0.829675	0.865045	0.867057	0.865644	0.874944	-0.031002	-0.033628	-0.0331747	-0.0332945	-0.068664	-0.070676	-0.069263	-0.078563
b4349	hsdM	b4349	hsdM	1.00214	1.01108	1.00168	1.00214	1.01322	1.01324	1.01323	0.963668	0.95683	0.962742	0.991698	-0.000456	-0.011535	-0.0115587	-0.0115513	0.038013	0.044851	0.038939	0.009983
b0147	thpR	b2675	nrdE	0.968774	0.998593	1.04741	0.968774	0.967367	0.967411	0.967398	0.937127	0.932732	0.952076	0.971047	0.078634	0.080041	0.0799971	0.0800102	0.110281	0.114676	0.095332	0.076361
b0297	eaeH	b3360	pabA	0.99361	1.09707	1.09851	0.99361	1.09068	1.09006	1.09026	1.00491	0.994383	0.976704	1.01821	0.104897	0.007828	0.00844827	0.00824478	0.093601	0.104124	0.121803	0.080298
b0081	mraZ	b0549	ybcO	0.974165	0.985475	0.964928	0.974165	0.95964	0.960015	0.959904	0.933266	0.929208	0.948949	0.966647	-0.009237	0.005288	0.00491275	0.00502425	0.031662	0.03572	0.015979	-0.001719
b3972	murB	b1960	vsr	1.10857	1.01722	1.03777	1.01722	1.12579	1.12766	1.12703	1.03575	1.01764	1.01014	1.06411	0.020547	-0.088026	-0.0898954	-0.0892663	0.002011	0.020121	0.027624	-0.026346
b1763	topB	b1848	yebG	0.950757	0.561404	0.560396	0.561404	0.512161	0.533759	0.529849	0.716465	0.749326	0.565557	0.642183	-0.001008	0.048235	0.0266372	0.0305466	-0.156069	-0.18893	-0.005161	-0.081787
b3283	yrdD	b1610	tus	0.980924	1.20631	0.995156	0.980924	1.18724	1.1833	1.18467	1.04319	1.02886	1.01694	1.02344	0.014232	-0.19208	-0.188144	-0.189519	-0.048032	-0.0337	-0.021786	-0.028287
b3377	yhfT	b0235	ykfJ	0.983431	0.782825	0.865459	0.782825	0.766256	0.769854	0.768961	0.843089	0.856866	0.829055	0.832008	0.082634	0.099203	0.0956046	0.0964983	0.02237	0.008593	0.036404	0.033451
b0711	ybgJ	b4200	rpsF	0.981481	0.570805	0.555662	0.570805	0.552286	0.560234	0.558729	0.740834	0.769098	0.593381	0.660037	-0.015143	0.003376	-0.00457226	-0.00306745	-0.185172	-0.213436	-0.037719	-0.104375
b0148	hrpB	b3386	rpe	0.995036	0.649508	0.61025	0.649508	0.644544	0.646284	0.645911	0.787098	0.808329	0.684179	0.730303	-0.039258	-0.034294	-0.0360338	-0.0356608	-0.176848	-0.198079	-0.073929	-0.120053
b3996	nudC	b1848	yebG	0.962521	0.561404	0.623127	0.561404	0.523925	0.540363	0.537353	0.724081	0.755424	0.572935	0.645074	0.061723	0.099202	0.0827639	0.0857745	-0.100954	-0.132297	0.050192	-0.021947
b0086	murF	b1750	ydjX	1.02363	0.976179	0.997446	0.976179	0.999805	0.999242	0.999415	0.961212	0.956821	0.986468	0.985534	0.021267	-0.002359	-0.00179621	-0.00196881	0.036234	0.040625	0.010978	0.011912
b1432	ydcM	b0442	ybaV	1.0252	0.993511	1.00048	0.993511	1.01871	1.01855	1.0186	0.970486	0.964727	0.991865	0.994647	0.006972	-0.018226	-0.0180625	-0.0181134	0.029997	0.035756	0.008618	0.005836
b0285	paoB	b1100	ycfH	0.997043	1.12629	0.996076	0.997043	1.12333	1.12296	1.12308	1.01551	1.00447	1.01126	1.02127	-0.000967	-0.127256	-0.126883	-0.127008	-0.019429	-0.00839	-0.015183	-0.02519
b0472	recR	b1848	yebG	1.00263	0.561404	0.518188	0.561404	0.56403	0.562878	0.563098	0.750044	0.776211	0.601422	0.666662	-0.043216	-0.045842	-0.0446902	-0.0449096	-0.231856	-0.258023	-0.083234	-0.148474
b0093	ftsQ	b1065	mdtH	1.06472	0.995046	0.995094	0.995046	1.05977	1.05945	1.05955	0.996803	0.985841	1.00044	1.02347	4.8e-05	-0.064673	-0.0643524	-0.0644553	-0.001709	0.009253	-0.005344	-0.02838
b4062	soxS	b3386	rpe	0.963168	0.649508	0.640415	0.649508	0.612676	0.625585	0.622899	0.766467	0.791811	0.652726	0.713758	-0.009093	0.027739	0.0148297	0.0175163	-0.126052	-0.151396	-0.012311	-0.073343
b0229	lfhA	b0279	yagM	0.980701	0.903177	1.0055	0.903177	0.883878	0.885747	0.885226	0.898649	0.904699	0.934195	0.917802	0.102321	0.12162	0.119751	0.120272	0.106849	0.100799	0.071303	0.087696
b0086	murF	b1730	ydjO	1.02363	0.913495	0.984047	0.913495	0.937121	0.935077	0.935672	0.931354	0.931171	0.961901	0.951508	0.070552	0.046926	0.0489698	0.0483748	0.052693	0.052876	0.022146	0.032539
b0258	ykfC	b0014	dnaK	0.998515	1.0606	0.97921	0.998515	1.05911	1.05902	1.05905	0.985167	0.978348	1.0017	1.00488	-0.019305	-0.079902	-0.079812	-0.0798409	-0.005957	0.000862	-0.022494	-0.025669
b3463	ftsE	b3386	rpe	0.962822	0.649508	0.682706	0.649508	0.61233	0.625361	0.62265	0.766243	0.791631	0.652397	0.713634	0.033198	0.070376	0.0573454	0.0600563	-0.083537	-0.108925	0.030309	-0.030928
b0179	lpxD	b3014	yqhH	0.973308	1.12751	1.02852	0.973308	1.10082	1.09742	1.09854	1.00072	0.992665	1.00882	1.01036	0.055214	-0.0723	-0.0688964	-0.0700192	0.027799	0.035857	0.019706	0.018163
b0085	murE	b1358	ydaT	1.19361	1.16793	1.09508	1.16793	1.36154	1.39405	1.38131	1.1626	1.12339	1.02244	1.11951	-0.072846	-0.266457	-0.298969	-0.286229	-0.067515	-0.028311	0.072643	-0.024433
b4505	ykgN	b1061	dinI	0.990051	1.2108	1.04448	0.990051	1.20085	1.19875	1.19949	1.05123	1.03542	1.01772	1.02759	0.054429	-0.156372	-0.154275	-0.155014	-0.006755	0.009056	0.026762	0.016887
b4143	groL	b0714	nei	1.11065	1.10318	1.00615	1.10318	1.21383	1.22525	1.22116	1.07804	1.0539	1.01772	1.08209	-0.097033	-0.207684	-0.219101	-0.215017	-0.0719	-0.04775	-0.011573	-0.075945
b1545	pinQ	b1848	yebG	0.935733	0.561404	0.550542	0.561404	0.497137	0.525324	0.520299	0.706738	0.741538	0.556763	0.640737	-0.010862	0.053405	0.0252178	0.0302426	-0.156196	-0.190996	-0.006221	-0.090195
b0095	ftsZ	b0183	rnhB	1.1458	1.02394	1.04629	1.02394	1.16974	1.17323	1.17202	1.06305	1.03969	1.01428	1.09228	0.022353	-0.123443	-0.126933	-0.125723	-0.016761	0.006605	0.032012	-0.045988
b1960	vsr	b1610	tus	0.968328	1.20631	1.06269	0.968328	1.17464	1.16811	1.17037	1.03503	1.02233	1.01618	1.01814	0.094365	-0.111947	-0.105413	-0.107674	0.02766	0.040366	0.046515	0.044554
b0472	recR	b0544	ybcK	1.00263	1.00762	1.0872	1.00263	1.01025	1.01027	1.01026	0.962593	0.958801	0.99021	0.986876	0.084571	0.076951	0.076931	0.0769372	0.124604	0.128396	0.096987	0.100321
b0085	murE	b4209	ytfE	1.19361	1.1067	1.21958	1.1067	1.30031	1.32097	1.31317	1.13343	1.09834	1.02102	1.12409	0.112879	-0.080732	-0.101391	-0.0935913	0.08615	0.121243	0.198566	0.095492
b0132	yadD	b1100	ycfH	0.974925	1.12629	0.980732	0.974925	1.10121	1.09805	1.09909	1.00119	0.993002	1.00884	1.01083	0.005807	-0.120482	-0.117315	-0.11836	-0.020454	-0.01227	-0.028113	-0.030102
b1352	kilR	b4233	mpl	1.00634	1.14735	1.04161	1.00634	1.15369	1.15462	1.1543	1.03156	1.0179	1.01419	1.02944	0.035268	-0.11208	-0.113014	-0.112694	0.010053	0.023706	0.027419	0.012166
b1921	fliZ	b3813	uvrD	0.983815	1.34034	0.941994	0.983815	1.32416	1.31865	1.32073	1.1089	1.0852	1.02216	1.01706	-0.041821	-0.382163	-0.376655	-0.378739	-0.166909	-0.143205	-0.080165	-0.075064
b1731	cedA	b4200	rpsF	1.15936	0.570805	0.535946	0.570805	0.730163	0.661767	0.676918	0.855989	0.861297	0.765034	0.886144	-0.034859	-0.194217	-0.125821	-0.140972	-0.320043	-0.325351	-0.229088	-0.350198
b0060	polB	b1731	cedA	0.996417	0.996293	0.981917	0.996293	0.99271	0.992723	0.992719	0.953178	0.950948	0.985159	0.97823	-0.014376	-0.010793	-0.0108063	-0.0108022	0.028739	0.030969	-0.003242	0.003687
b0015	dnaJ	b4056	yjbQ	0.989485	0.962598	1.09343	0.962598	0.952083	0.952476	0.95236	0.93264	0.933567	0.97038	0.957561	0.130832	0.141347	0.140954	0.14107	0.16079	0.159863	0.12305	0.135869
b0393	rdgC	b1764	selD	0.988747	0.942195	0.9563	0.942195	0.930942	0.931592	0.931404	0.922444	0.924836	0.960715	0.945881	0.014105	0.025358	0.0247075	0.0248962	0.033856	0.031464	-0.004415	0.010419
b0760	modF	b1114	mfd	0.883252	0.876457	0.960028	0.876457	0.759709	0.774132	0.77054	0.822834	0.843254	0.833702	0.875801	0.083571	0.200319	0.185896	0.189488	0.137194	0.116774	0.126326	0.084227
b1179	ycgL	b1238	tdk	0.97854	1.32983	1.00587	0.97854	1.30837	1.30129	1.30394	1.10048	1.07816	1.02183	1.01655	0.027326	-0.302503	-0.295425	-0.298078	-0.094614	-0.072297	-0.015968	-0.010688
b1836	yebV	b1061	dinI	0.989398	1.2108	0.962268	0.989398	1.2002	1.19796	1.19875	1.05081	1.03509	1.01768	1.02731	-0.02713	-0.237931	-0.235696	-0.236484	-0.088544	-0.072817	-0.055416	-0.065039
b0437	clpP	b1626	ydgK	0.981067	1.01245	1.04625	0.981067	0.993519	0.993283	0.993355	0.950938	0.949603	0.985937	0.977334	0.065179	0.052727	0.0529628	0.0528908	0.095308	0.096643	0.060309	0.068912
b3047	yqiH	b1652	rnt	0.986536	0.730684	0.758836	0.730684	0.71722	0.720846	0.719994	0.820262	0.83714	0.771825	0.791692	0.028152	0.041616	0.0379899	0.0388424	-0.061426	-0.078304	-0.012989	-0.032856
b0397	sbcC	b2160	yeiI	0.993285	0.904111	0.990486	0.904111	0.897396	0.89804	0.897858	0.907241	0.911604	0.941938	0.925462	0.086375	0.09309	0.0924461	0.0926275	0.083245	0.078882	0.048548	0.065024
b0547	ybcN	b1359	ydaU	0.979004	0.815623	0.827905	0.815623	0.794627	0.798498	0.797507	0.855845	0.867992	0.859607	0.855082	0.012282	0.033278	0.0294068	0.0303976	-0.02794	-0.040087	-0.031702	-0.027177
b3638	yicR	b4173	hflX	0.980995	1.22262	1.03969	0.980995	1.20361	1.19938	1.20088	1.051	1.03557	1.01793	1.02404	0.058699	-0.16392	-0.159689	-0.161182	-0.011307	0.004128	0.021762	0.015658
b0921	smtA	b3996	nudC	0.978559	1.14976	1.00625	0.978559	1.12832	1.12511	1.12619	1.01472	1.00449	1.01202	1.01668	0.027696	-0.122069	-0.118858	-0.119937	-0.008466	0.001764	-0.005768	-0.010424
b0091	murC	b4349	hsdM	0.956838	1.01108	0.877509	0.956838	0.967917	0.967439	0.967582	0.934598	0.936483	0.978085	0.965637	-0.079329	-0.090408	-0.0899298	-0.0900728	-0.057089	-0.058974	-0.100576	-0.088128
b2916	argP	b0393	rdgC	0.981396	1.21979	0.949888	0.981396	1.20119	1.1971	1.19854	1.04992	1.03462	1.01779	1.02414	-0.031508	-0.251303	-0.247214	-0.248655	-0.100028	-0.08473	-0.067904	-0.074253
b2009	sbmC	b3385	gph	0.979665	0.670797	0.714599	0.670797	0.650462	0.657156	0.655702	0.787287	0.809072	0.6929	0.738484	0.043802	0.064137	0.0574427	0.0588974	-0.072688	-0.094473	0.021699	-0.023885
b4389	radA	b3386	rpe	0.996954	0.649508	0.696832	0.649508	0.646462	0.64753	0.6473	0.78834	0.809323	0.68614	0.73162	0.047324	0.05037	0.0493024	0.0495317	-0.091508	-0.112491	0.010692	-0.034788
b0094	ftsA	b3266	acrF	0.933428	0.893145	0.905553	0.893145	0.826573	0.833687	0.831801	0.863267	0.876091	0.894302	0.892569	0.012408	0.07898	0.0718664	0.0737516	0.042286	0.029462	0.011251	0.012984
b0397	sbcC	b2002	yeeS	0.993285	1.11879	1.00541	0.993285	1.11207	1.11128	1.11154	1.0095	0.99945	1.00998	1.0179	0.012128	-0.106662	-0.105864	-0.10613	-0.004087	0.005963	-0.004568	-0.012488
b0375	yaiV	b1569	dicC	0.986227	1.00995	0.946472	0.986227	0.99618	0.996043	0.996085	0.953088	0.951255	0.986591	0.978877	-0.039755	-0.049708	-0.0495709	-0.0496129	-0.006616	-0.004783	-0.040119	-0.032405
b0132	yadD	b0014	dnaK	0.974925	1.0606	1.07366	0.974925	1.03552	1.034	1.03448	0.969895	0.966121	0.997335	0.99304	0.098737	0.03814	0.0396595	0.0391808	0.103767	0.107541	0.076327	0.080622
b1401	ydbA	b3386	rpe	0.988255	0.649508	0.71006	0.649508	0.637763	0.64188	0.641002	0.782708	0.804814	0.677304	0.725935	0.060552	0.072297	0.0681805	0.0690576	-0.072648	-0.094754	0.032756	-0.015875
b1755	ynjC	b3813	uvrD	0.981759	1.34034	1.07681	0.981759	1.3221	1.31589	1.31824	1.10757	1.08413	1.02212	1.0163	0.095052	-0.24529	-0.239082	-0.241427	-0.030761	-0.007323	0.054689	0.060514
b4206	ytfB	b1848	yebG	0.964906	0.561404	0.58594	0.561404	0.52631	0.541702	0.538876	0.725624	0.756659	0.574483	0.64585	0.024536	0.05963	0.0442379	0.0470636	-0.139684	-0.170719	0.011457	-0.05991
b0262	afuC	b1195	ymgE	0.978728	0.954794	0.937872	0.954794	0.933522	0.934484	0.934204	0.921959	0.924798	0.962496	0.947626	-0.016922	0.00435	0.00338838	0.00366805	0.015913	0.013074	-0.024624	-0.009754
b0059	hepA	b4058	uvrA	0.941868	0.94974	0.992206	0.941868	0.891608	0.89453	0.893709	0.895689	0.903624	0.941781	0.929252	0.050338	0.100598	0.0976763	0.0984966	0.096517	0.088582	0.050425	0.062954
b0760	modF	b1271	yciK	0.883252	0.848632	0.888034	0.848632	0.731884	0.749556	0.745274	0.80958	0.831869	0.802301	0.858147	0.039402	0.15615	0.138478	0.14276	0.078454	0.056165	0.085733	0.029887
b0421	ispA	b3360	pabA	0.976678	1.09707	1.07892	0.976678	1.07375	1.07148	1.07222	0.988403	0.981954	1.00473	1.00483	0.102244	0.005175	0.00743884	0.0067057	0.090519	0.096968	0.074192	0.074097
b3158	yhbU	b3147	lpoA	0.98135	0.734928	0.714896	0.734928	0.716278	0.721222	0.720059	0.818926	0.836188	0.771364	0.792212	-0.020032	-0.001382	-0.00632559	-0.00516309	-0.10403	-0.121292	-0.056468	-0.077316
b3972	murB	b2184	radD	1.10857	1.11338	1.1354	1.10857	1.22196	1.23427	1.22984	1.08156	1.05699	1.01819	1.08191	0.026832	-0.086552	-0.0988624	-0.0944355	0.053843	0.07841	0.117218	0.05349
b0252	yafZ	b2892	recJ	1.00775	0.86498	0.92531	0.86498	0.872729	0.871683	0.871971	0.897965	0.903089	0.924531	0.908769	0.06033	0.052581	0.0536273	0.0533394	0.027345	0.022221	0.000779	0.016541
b3043	ygiL	b4378	yjjV	0.966964	0.693316	0.711471	0.693316	0.66028	0.670412	0.668174	0.789792	0.811705	0.70599	0.751051	0.018155	0.051191	0.0410594	0.0432974	-0.078321	-0.100234	0.005481	-0.03958
b2627	abpB	b3362	yhfG	0.980763	0.76507	0.708451	0.76507	0.745833	0.750352	0.749254	0.832904	0.848218	0.8063	0.816367	-0.056619	-0.037382	-0.0419013	-0.0408028	-0.124453	-0.139767	-0.097849	-0.107916
b3163	nlpI	b4200	rpsF	0.986968	0.570805	0.582188	0.570805	0.557773	0.563366	0.562302	0.744386	0.771942	0.597494	0.663108	0.011383	0.024415	0.0188217	0.0198863	-0.162198	-0.189754	-0.015306	-0.08092
b1731	cedA	b4372	holD	1.15936	1.15403	1.06367	1.15403	1.31339	1.33794	1.32859	1.1338	1.09995	1.02148	1.1084	-0.090364	-0.249722	-0.274269	-0.26492	-0.070133	-0.036282	0.042188	-0.044732
b3972	murB	b3442	yhhZ	1.10857	1.10827	1.12815	1.10827	1.21685	1.2286	1.22439	1.07913	1.0549	1.0179	1.08141	0.019876	-0.088697	-0.100452	-0.0962391	0.049022	0.073245	0.110244	0.046739
b0132	yadD	b4312	fimB	0.974925	0.821225	1.06313	0.821225	0.79615	0.800633	0.799483	0.855874	0.868171	0.861584	0.857238	0.241905	0.26698	0.262497	0.263647	0.207256	0.194959	0.201546	0.205892
b0760	modF	b1843	yobB	0.883252	0.875108	0.965997	0.875108	0.75836	0.772941	0.769314	0.822191	0.842702	0.832226	0.874967	0.090889	0.207637	0.193056	0.196683	0.143806	0.123295	0.133771	0.09103
b3261	fis	b4200	rpsF	1.01543	0.570805	0.630819	0.570805	0.58623	0.57961	0.580904	0.727624	0.728195	0.567527	0.647795	0.060014	0.044589	0.0512093	0.0499148	-0.096805	-0.097376	0.063292	-0.016976
b2900	yqfB	b0711	ybgJ	0.987801	1.2328	1.02609	0.987801	1.2206	1.21777	1.21878	1.07656	1.0699	1.02658	1.03394	0.03829	-0.194514	-0.191674	-0.192687	-0.050471	-0.043804	-0.000484	-0.007845
b3383	yhfZ	b4349	hsdM	1.04872	1.01108	1.01919	1.01108	1.0598	1.06034	1.06017	0.987321	0.974949	1.0084	1.02129	0.008109	-0.040616	-0.0411558	-0.0409825	0.031867	0.044239	0.01079	-0.002105
b3014	yqhH	b3385	gph	0.98051	0.670797	0.726423	0.670797	0.651307	0.657723	0.656328	0.76389	0.768205	0.646103	0.723301	0.055626	0.075116	0.0686998	0.0700952	-0.037467	-0.041782	0.08032	0.003122
b0938	elfA	b1630	rsxD	0.962564	0.781211	0.856879	0.781211	0.743775	0.751966	0.749972	0.814957	0.820163	0.786062	0.818405	0.075668	0.113104	0.104913	0.106907	0.041922	0.036716	0.070817	0.038474
b0089	ftsW	b0442	ybaV	0.945021	0.993511	1.03123	0.945021	0.938532	0.938889	0.938785	0.922217	0.926468	0.984274	0.961536	0.08621	0.092699	0.0923422	0.0924464	0.109014	0.104763	0.046957	0.069695
b3387	dam	b1055	yceA	0.96252	1.28869	1.0589	0.96252	1.25121	1.24039	1.24431	1.09375	1.09008	1.02761	1.0176	0.096376	-0.192315	-0.181495	-0.185412	-0.034853	-0.031186	0.031289	0.041296
b0226	dinJ	b3649	rpoZ	0.993863	0.989265	0.95669	0.989265	0.983128	0.983194	0.983174	0.946001	0.942642	0.993491	0.979898	-0.032575	-0.026438	-0.0265039	-0.0264839	0.010689	0.014048	-0.036801	-0.023208
b0183	rnhB	b1271	yciK	0.997626	0.848632	0.920238	0.848632	0.846258	0.846617	0.846521	0.870748	0.869258	0.898547	0.887833	0.071606	0.07398	0.0736207	0.0737172	0.04949	0.05098	0.021691	0.032405
b2121	yehP	b3813	uvrD	0.981522	1.34034	1.02788	0.981522	1.32186	1.31558	1.31795	1.13229	1.12473	1.02849	1.01822	0.046358	-0.293984	-0.287695	-0.290071	-0.104408	-0.096847	-0.00061	0.009655
b0090	murG	b1335	ogt	1.0594	0.918744	0.956568	0.918744	0.978141	0.973315	0.974766	0.942298	0.929862	0.978859	0.976948	0.037824	-0.021573	-0.0167466	-0.0181976	0.01427	0.026706	-0.022291	-0.02038
b3182	dacB	b0712	ybgK	0.99006	1.24575	1.05531	0.99006	1.23581	1.23336	1.23424	1.08488	1.07763	1.02698	1.03449	0.065249	-0.180496	-0.178053	-0.178933	-0.029571	-0.022322	0.028331	0.020823
b3972	murB	b1176	minC	1.10857	0.971055	1	0.971055	1.07963	1.07649	1.07751	0.997333	0.976246	1.00683	1.04128	0.028945	-0.079628	-0.0764854	-0.0775069	0.002667	0.023754	-0.006834	-0.041281
b1731	cedA	b0398	sbcD	1.15936	0.906849	1.14087	0.906849	1.06621	1.05136	1.05611	0.989214	0.96126	0.996682	1.04419	0.234018	0.07466	0.0895044	0.084758	0.151653	0.179607	0.144185	0.096676
b0760	modF	b0454	atl	0.883252	0.813896	0.811574	0.813896	0.697148	0.718875	0.713795	0.790505	0.807617	0.769722	0.842242	-0.002322	0.114426	0.0926987	0.0977794	0.021069	0.003957	0.041852	-0.030668
b0086	murF	b1100	ycfH	1.02363	1.12629	1.04275	1.02363	1.14992	1.1529	1.15188	1.0372	1.02676	1.02221	1.0441	0.019124	-0.107165	-0.110149	-0.109128	0.005552	0.015991	0.020536	-0.00135
b0760	modF	b4526	ydaE	0.883252	0.891252	0.868393	0.883252	0.774504	0.7872	0.783993	0.833006	0.848764	0.875064	0.893514	-0.014859	0.093889	0.0811929	0.0843998	0.035387	0.019629	-0.006671	-0.025121
b4143	groL	b0015	dnaJ	1.11065	1.12579	1.05402	1.11065	1.23644	1.25036	1.2453	1.08346	1.05933	1.02509	1.09035	-0.056626	-0.182412	-0.19633	-0.191278	-0.029431	-0.005308	0.028931	-0.036325
b0247	ykfG	b0517	allD	0.976414	0.930069	0.89007	0.930069	0.906483	0.908132	0.907664	0.904148	0.90457	0.958868	0.937429	-0.039999	-0.016413	-0.0180624	-0.0175936	-0.014078	-0.0145	-0.068798	-0.047359
b0398	sbcD	b1728	ydjM	0.991938	0.889276	0.936263	0.889276	0.881214	0.882107	0.881859	0.890036	0.88873	0.93458	0.916232	0.046987	0.055049	0.0541563	0.0544042	0.046227	0.047533	0.001683	0.020031
b0760	modF	b1728	ydjM	0.883252	0.889276	0.899918	0.883252	0.772528	0.785455	0.782196	0.83192	0.847713	0.872691	0.892313	0.016666	0.12739	0.114463	0.117722	0.067998	0.052205	0.027227	0.007605
b3972	murB	b0228	rayT	1.10857	0.904247	1.09473	0.904247	1.01282	1.00242	1.00562	0.960628	0.94071	0.984828	1.00416	0.190487	0.081914	0.0923102	0.0891091	0.134106	0.154024	0.109906	0.090572
b4044	dinF	b1238	tdk	0.984683	1.32983	0.960378	0.984683	1.31451	1.30946	1.31136	1.1282	1.12033	1.0284	1.02167	-0.024305	-0.354134	-0.349082	-0.350984	-0.167824	-0.159949	-0.068021	-0.06129
b0760	modF	b3281	aroE	0.883252	0.827383	0.8301	0.827383	0.710635	0.730788	0.726009	0.797915	0.814791	0.78937	0.851756	0.002717	0.119465	0.0993123	0.104091	0.032185	0.015309	0.04073	-0.021656
b4170	mutL	b3385	gph	0.995354	0.670797	0.733849	0.670797	0.666151	0.66768	0.667343	0.771827	0.773807	0.656243	0.728527	0.063052	0.067698	0.0661685	0.0665057	-0.037978	-0.039958	0.077606	0.005322
b0393	rdgC	b0393	rdgC	0.988747	1.21979	0.91283	0.988747	1.20854	1.20607	1.20694	1.06992	1.06333	1.02617	1.03464	-0.075917	-0.295712	-0.293239	-0.294115	-0.157091	-0.150503	-0.113337	-0.121807
b0090	murG	b1360	ydaV	1.0594	0.953236	1.00304	0.953236	1.01263	1.00986	1.01071	0.961249	0.948209	0.993577	0.998181	0.049808	-0.009589	-0.00681136	-0.0076706	0.041795	0.054835	0.009467	0.004863
b0229	lfhA	b0760	modF	0.980701	0.951069	0.975392	0.951069	0.93177	0.932714	0.93244	0.917978	0.917358	0.973004	0.952329	0.024323	0.043622	0.0426777	0.0429519	0.057414	0.058034	0.002388	0.023063
b1432	ydcM	b3937	yiiX	1.0252	0.963047	1.02788	0.963047	0.988245	0.987314	0.987597	0.948352	0.940522	0.990128	0.982402	0.064837	0.039639	0.0405701	0.0402872	0.079532	0.087362	0.037756	0.045482
b1731	cedA	b1100	ycfH	1.15936	1.12629	1.09679	1.12629	1.28565	1.30577	1.29824	1.10978	1.07798	1.0262	1.11206	-0.029498	-0.188856	-0.208981	-0.201446	-0.012985	0.018809	0.070593	-0.015273
b3972	murB	b3584	yiaT	1.10857	1.02196	1.0732	1.02196	1.13053	1.13291	1.13211	1.0253	1.00332	1.01617	1.0631	0.051248	-0.057325	-0.0597089	-0.0589039	0.047906	0.069884	0.057035	0.010103
b4142	groS	b3386	rpe	0.999013	0.649508	0.650381	0.649508	0.648521	0.648867	0.648792	0.762088	0.763864	0.633049	0.710357	0.000873	0.00186	0.00151406	0.00158851	-0.111707	-0.113483	0.017332	-0.059976
b0093	ftsQ	b3267	yhdV	1.06472	0.939229	0.968694	0.939229	1.00395	1.00002	1.00122	0.9564	0.942768	0.989353	0.993497	0.029465	-0.035256	-0.0313228	-0.0325305	0.012294	0.025926	-0.020659	-0.024803
b3972	murB	b3649	rpoZ	1.10857	0.989265	1.04476	0.989265	1.09784	1.09667	1.09706	1.00734	0.985932	1.01074	1.04975	0.05549	-0.053083	-0.0519175	-0.0523017	0.037417	0.058823	0.034018	-0.004999
b0089	ftsW	b3937	yiiX	0.945021	0.963047	1.03702	0.945021	0.908068	0.9101	0.909521	0.90548	0.910264	0.968608	0.945715	0.091994	0.128947	0.126915	0.127494	0.131535	0.126751	0.068407	0.0913
b0760	modF	b2124	yehS	0.883252	0.900543	0.805797	0.883252	0.783795	0.795406	0.792448	0.83811	0.853706	0.885926	0.899071	-0.077455	0.022002	0.0103906	0.0133493	-0.032313	-0.047909	-0.080129	-0.093274
b0551	ybcQ	b3385	gph	0.993158	0.670797	0.702404	0.670797	0.663955	0.666207	0.665712	0.770653	0.772978	0.65472	0.727638	0.031607	0.038449	0.0361966	0.0366922	-0.068249	-0.070574	0.047684	-0.025234
b0088	murD	b2892	recJ	1.04545	0.86498	0.928652	0.86498	0.910433	0.904296	0.906037	0.905303	0.896002	0.939002	0.929125	0.063672	0.018219	0.0243561	0.0226155	0.023349	0.03265	-0.01035	-0.000473
b0090	murG	b0014	dnaK	1.0594	1.0606	0.954538	1.0594	1.11999	1.12359	1.12239	1.02023	1.00532	1.01768	1.04703	-0.104859	-0.165456	-0.169055	-0.167848	-0.065696	-0.050778	-0.063141	-0.092492
b0147	thpR	b2820	recB	0.968774	0.838298	0.824116	0.838298	0.807072	0.812121	0.810811	0.849642	0.852872	0.86825	0.867859	-0.014182	0.017044	0.0119947	0.0133049	-0.025526	-0.028756	-0.044134	-0.043743
b1731	cedA	b1343	dbpA	1.15936	0.767086	1.08851	0.767086	0.926444	0.889327	0.899765	0.912426	0.886918	0.906906	0.954811	0.321421	0.162063	0.19918	0.188742	0.176081	0.201589	0.181601	0.133696
b0890	ftsK	b3381	yhfX	1.06262	1.15576	0.979208	1.06262	1.21838	1.22813	1.22464	1.07424	1.05715	1.02525	1.06922	-0.083409	-0.23917	-0.248923	-0.245428	-0.095032	-0.077942	-0.046041	-0.090007
b3972	murB	b0015	dnaJ	1.10857	1.12579	1.01681	1.10857	1.23436	1.24802	1.24307	1.08234	1.05855	1.02504	1.08931	-0.091765	-0.217551	-0.231208	-0.226257	-0.065536	-0.041741	-0.008232	-0.072505
b3972	murB	b2928	yggC	1.10857	1.10827	1.15355	1.10827	1.21684	1.22859	1.22438	1.07272	1.04923	1.02414	1.08661	0.045289	-0.063284	-0.0750387	-0.0708257	0.080836	0.104324	0.129419	0.066949
b0760	modF	b1061	dinI	0.883252	1.2108	0.869629	0.883252	1.09405	1.06944	1.07743	1.00857	1.01874	1.02272	0.989403	-0.013623	-0.224424	-0.199813	-0.207798	-0.138941	-0.149107	-0.153093	-0.119774
b0147	thpR	b0015	dnaJ	0.968774	1.12579	0.981032	0.968774	1.09456	1.09063	1.09192	1.00759	1.00579	1.01941	1.01645	0.012258	-0.113528	-0.1096	-0.11089	-0.02656	-0.024759	-0.038378	-0.035421
b4143	groL	b2002	yeeS	1.11065	1.11879	1.07182	1.11065	1.22944	1.24259	1.23784	1.07961	1.05561	1.02476	1.08936	-0.038829	-0.157619	-0.170763	-0.166013	-0.00779	0.01621	0.047065	-0.017542
b4143	groL	b0547	ybcN	1.11065	1.1165	1.05166	1.11065	1.22715	1.24004	1.23539	1.07835	1.05439	1.02464	1.08902	-0.058989	-0.175486	-0.188377	-0.183725	-0.02669	-0.00273	0.027021	-0.037356
b0090	murG	b3095	yqjA	1.0594	1.09269	1.14218	1.0594	1.15209	1.15759	1.1557	1.03787	1.02239	1.02107	1.05632	0.08278	-0.00991	-0.0154155	-0.0135265	0.104311	0.11979	0.121106	0.085858
b0089	ftsW	b2823	ppdC	0.945021	0.990092	0.992453	0.945021	0.935113	0.935658	0.935499	0.920339	0.924649	0.982718	0.959862	0.047432	0.05734	0.0567953	0.0569539	0.072114	0.067804	0.009735	0.032591
b0634	mrdB	b1628	rsxB	0.99211	0.898126	0.976428	0.898126	0.890236	0.89104	0.890815	0.89499	0.893502	0.941922	0.922689	0.078302	0.086192	0.0853882	0.0856133	0.081438	0.082926	0.034506	0.053739
b3023	ygiV	b0543	emrE	0.985028	0.782894	0.790164	0.782894	0.767922	0.771173	0.770364	0.827894	0.829536	0.806349	0.82693	0.00727	0.022242	0.0189915	0.0198	-0.03773	-0.039372	-0.016185	-0.036766
b3972	murB	b1576	ydfD	1.10857	1.10603	1.00554	1.10603	1.21461	1.22612	1.222	1.07149	1.04804	1.02401	1.08621	-0.100494	-0.209067	-0.220579	-0.216459	-0.065953	-0.042503	-0.018468	-0.080672
b1184	umuC	b4200	rpsF	0.978842	0.570805	0.547074	0.570805	0.549647	0.558728	0.557013	0.708062	0.714389	0.553775	0.633511	-0.023731	-0.002573	-0.0116539	-0.00993905	-0.160988	-0.167315	-0.006701	-0.086437
b0090	murG	b1184	umuC	1.0594	1.00614	0.967994	1.00614	1.06554	1.0659	1.06579	0.990316	0.976351	1.00861	1.02563	-0.038149	-0.097546	-0.0979109	-0.0977932	-0.022322	-0.008357	-0.040615	-0.057636
b0088	murD	b1963	yedR	1.04545	1.03657	0.978712	1.03657	1.08203	1.08369	1.08315	0.999579	0.987275	1.01301	1.03014	-0.057862	-0.103315	-0.104977	-0.104435	-0.020867	-0.008563	-0.034298	-0.051429
b0148	hrpB	b2109	yehB	0.995036	0.759035	0.93677	0.759035	0.754071	0.755267	0.754975	0.820137	0.820622	0.779946	0.809811	0.177735	0.182699	0.181503	0.181795	0.116633	0.116148	0.156824	0.126959
b0490	fetA	b1765	ydjA	0.979961	1.16778	0.995845	0.979961	1.14774	1.14438	1.14552	1.03665	1.03235	1.02343	1.02792	0.015884	-0.151895	-0.148533	-0.149678	-0.0408	-0.036504	-0.027588	-0.03208
b0760	modF	b0267	yagA	0.883252	0.879907	0.958434	0.879907	0.763159	0.77718	0.773676	0.826773	0.842729	0.861153	0.886537	0.078527	0.195275	0.181254	0.184758	0.131661	0.115705	0.097281	0.071897
b4143	groL	b3361	fic	1.11065	1.02248	1.04528	1.02248	1.13313	1.13562	1.13478	1.0267	1.00439	1.0164	1.06457	0.022799	-0.087852	-0.0903397	-0.089498	0.018582	0.040896	0.028878	-0.019288
b4143	groL	b0547	ybcN	1.11065	1.1165	1.04989	1.11065	1.22715	1.24004	1.23539	1.07835	1.05439	1.02464	1.08902	-0.060757	-0.177254	-0.190145	-0.185493	-0.028458	-0.004498	0.025253	-0.039124
b0297	eaeH	b0442	ybaV	0.99361	0.993511	0.918209	0.993511	0.987121	0.987162	0.98715	0.948198	0.944804	0.994954	0.981953	-0.075302	-0.068912	-0.0689535	-0.0689409	-0.029989	-0.026595	-0.076745	-0.063744
b0081	mraZ	b1055	yceA	0.974165	1.28869	1.05797	0.974165	1.26286	1.2554	1.25812	1.09998	1.09448	1.02773	1.02303	0.083805	-0.204886	-0.197428	-0.200151	-0.042006	-0.036506	0.030242	0.034941
b0714	nei	b0712	ybgK	0.980436	1.24575	0.989623	0.980436	1.22618	1.22137	1.22309	1.07973	1.074	1.02683	1.02983	0.009187	-0.236558	-0.23175	-0.23347	-0.090111	-0.084376	-0.037211	-0.040207
b0183	rnhB	b0228	rayT	0.997626	0.904247	0.930964	0.904247	0.901873	0.9021	0.902036	0.901303	0.89884	0.948969	0.929674	0.026717	0.029091	0.0288637	0.028928	0.029661	0.032124	-0.018005	0.00129
b0398	sbcD	b3095	yqjA	0.991938	1.09269	0.927094	0.991938	1.08463	1.08388	1.08412	1.00179	0.996928	1.01701	1.01989	-0.064844	-0.157534	-0.156787	-0.157031	-0.0747	-0.069834	-0.089915	-0.092794
b2698	recX	b0711	ybgJ	0.985106	1.2328	0.968169	0.985106	1.21791	1.21444	1.21568	1.07512	1.06888	1.02653	1.03263	-0.016937	-0.249741	-0.246274	-0.247508	-0.106952	-0.100709	-0.05836	-0.064457

## Sheet: Positive_test_data
Table S2. List of training (336; Sheet 1), and test (400 interacting, Sheet 2; 400 non-interacting, Sheet 3) gene pairs and their predicted GI (ε) scores based on observed and expected mutant fitness.
Bnum1	Gene1	Bnum2	Gene2	Observed Actual Fitness			Expected Mutant Fitness								GI score (ε; Observed-Expected)
				Wx	Wy	Wxy	Min	Add	Multi	Log	LR	SVR	NN	GP	εMin	εAdd	εMulti	εLog	εLR	εSVR	εNN	εGP
b1350	recE	b0014	dnaK	0.966743	1.0606	0.0851529	0.966743	1.02734	1.02533	1.02596	0.967005	0.962135	1.02367	0.995442	-0.881591	-0.942187	-0.940177	-0.940807	-0.881852	-0.876982	-0.938516	-0.910289
b3865	yihA	b0014	dnaK	0.956731	1.0606	0	0.956731	1.01733	1.01471	1.01552	0.961218	0.957059	1.02261	0.99127	-0.956731	-1.01733	-1.01471	-1.01552	-0.961218	-0.957059	-1.02261	-0.99127
b1860	ruvB	b0015	dnaJ	0.937562	1.12579	0	0.937562	1.06335	1.05549	1.05801	0.984523	0.977864	1.03029	0.999798	-0.937562	-1.06335	-1.05549	-1.05801	-0.984523	-0.977864	-1.03029	-0.999798
b0548	ninE	b0015	dnaJ	0.982621	1.12579	0	0.982621	1.10841	1.10622	1.10695	1.01057	1.00071	1.03295	1.01886	-0.982621	-1.10841	-1.10622	-1.10695	-1.01057	-1.00071	-1.03295	-1.01886
b4312	fimB	b0059	hepA	0.983829	0.954317	0.277361	0.954317	0.938146	0.938885	0.938669	0.920821	0.921033	0.998043	0.954904	-0.676955	-0.660785	-0.661524	-0.661308	-0.64346	-0.643672	-0.720682	-0.677543
b0442	ybaV	b0178	skp	0.966497	0.94909	0.464845	0.94909	0.915588	0.917293	0.916805	0.908046	0.909798	0.991583	0.94438	-0.484245	-0.450743	-0.452448	-0.45196	-0.443201	-0.444953	-0.526738	-0.479535
b2827	thyA	b0178	skp	0.988639	0.94909	0	0.94909	0.937729	0.938307	0.938139	0.920844	0.921024	0.997126	0.954136	-0.94909	-0.937729	-0.938307	-0.938139	-0.920844	-0.921024	-0.997126	-0.954136
b3933	ftsN	b0178	skp	0.948462	0.94909	0.00465299	0.948462	0.897552	0.900176	0.899435	0.897622	0.900655	0.986625	0.937845	-0.943809	-0.892899	-0.895523	-0.894782	-0.892969	-0.896002	-0.981972	-0.933192
b4526	ydaE	b0213	yafS	1.0052	0.933783	0.339891	0.933783	0.93898	0.938636	0.938736	0.922341	0.922251	0.994955	0.953392	-0.593892	-0.599089	-0.598745	-0.598845	-0.58245	-0.58236	-0.655064	-0.613501
b3701	dnaN	b0214	rnhA	0.977777	1.18716	0.160243	0.977777	1.16494	1.16078	1.16221	1.04014	1.02699	1.03684	1.02327	-0.817534	-1.0047	-1.00054	-1.00197	-0.879897	-0.866747	-0.876601	-0.863025
b3066	dnaG	b0214	rnhA	0.973921	1.18716	0.359884	0.973921	1.16108	1.1562	1.15788	1.03791	1.02503	1.03673	1.02156	-0.614037	-0.801196	-0.796316	-0.797996	-0.678027	-0.665151	-0.676843	-0.661675
b4441	glmY	b0215	dnaQ	0.994726	0.817702	0	0.817702	0.812429	0.81339	0.81314	0.85506	0.862589	0.914666	0.862373	-0.817702	-0.812429	-0.81339	-0.81314	-0.85506	-0.862589	-0.914666	-0.862373
b0912	ihfB	b0262	afuC	0.957642	1.15036	0.25505	0.957642	1.108	1.10164	1.10374	1.00909	0.999552	1.03374	1.01149	-0.702592	-0.85295	-0.84659	-0.84869	-0.754043	-0.744502	-0.778691	-0.756441
b2827	thyA	b0285	paoB	0.988639	1.03734	0	0.988639	1.02597	1.02555	1.02568	0.967391	0.962343	1.02186	0.997138	-0.988639	-1.02597	-1.02555	-1.02568	-0.967391	-0.962343	-1.02186	-0.997138
b4441	glmY	b0375	yaiV	0.994726	1.17984	0.454578	0.994726	1.17457	1.17362	1.17395	1.04608	1.03216	1.03698	1.03062	-0.540148	-0.719992	-0.719042	-0.719372	-0.591498	-0.577578	-0.582406	-0.576045
b2699	recA	b0375	yaiV	0.925962	1.17984	0.121428	0.925962	1.1058	1.09249	1.09687	1.00633	0.997294	1.03453	1.00146	-0.804535	-0.984372	-0.971062	-0.975442	-0.884902	-0.875866	-0.913102	-0.880036
b2576	srmB	b0398	sbcD	0.962051	0.906849	0	0.906849	0.868901	0.872436	0.871463	0.883196	0.887766	0.968121	0.916138	-0.906849	-0.868901	-0.872436	-0.871463	-0.883196	-0.887766	-0.968121	-0.916138
b1843	yobB	b0398	sbcD	0.978856	0.906849	0	0.906849	0.885705	0.887675	0.887125	0.892909	0.896285	0.974078	0.922824	-0.906849	-0.885705	-0.887675	-0.887125	-0.892909	-0.896285	-0.974078	-0.922824
b0712	ybgK	b0422	xseB	0.977519	1.01763	0.0153102	0.977519	0.995152	0.994755	0.994877	0.950571	0.94748	1.0163	0.983939	-0.962208	-0.979842	-0.979445	-0.979567	-0.935261	-0.93217	-1.00099	-0.968629
b0789	clsB	b0422	xseB	0.952414	1.01763	0	0.952414	0.970047	0.969208	0.969459	0.93606	0.934753	1.01251	0.973526	-0.952414	-0.970047	-0.969208	-0.969459	-0.93606	-0.934753	-1.01251	-0.973526
b0912	ihfB	b0422	xseB	0.957642	1.01763	0.254964	0.957642	0.975276	0.974529	0.974753	0.939082	0.937403	1.01334	0.975543	-0.702678	-0.720312	-0.719565	-0.719789	-0.684118	-0.682439	-0.758376	-0.720579
b1916	sdiA	b0437	clpP	0.946157	0.730005	1.93883	0.730005	0.676162	0.690699	0.687408	0.780729	0.796903	0.780574	0.769938	1.20883	1.26267	1.24814	1.25143	1.15811	1.14193	1.15826	1.1689
b0088	murD	b0438	clpX	1.04545	0.912864	0.34479	0.912864	0.958317	0.954357	0.955529	0.934575	0.932865	0.996275	0.965301	-0.568074	-0.613527	-0.609567	-0.610739	-0.589785	-0.588075	-0.651485	-0.620511
b1848	yebG	b0438	clpX	0.967585	0.912864	0	0.912864	0.880449	0.883274	0.882489	0.889567	0.893388	0.97365	0.922214	-0.912864	-0.880449	-0.883274	-0.882489	-0.889567	-0.893388	-0.97365	-0.922214
b1633	nth	b0438	clpX	0.92722	0.912864	0.00431452	0.912864	0.840084	0.846426	0.844724	0.866236	0.872923	0.958534	0.910195	-0.908549	-0.835769	-0.842111	-0.840409	-0.861921	-0.868608	-0.954219	-0.90588
b0712	ybgK	b0440	hupB	0.977519	0.761323	0	0.761323	0.738842	0.744207	0.742912	0.815376	0.827467	0.843089	0.805808	-0.761323	-0.738842	-0.744207	-0.742912	-0.815376	-0.827467	-0.843089	-0.805808
b0083	ftsL	b0440	hupB	0.977665	0.761323	0.00266513	0.761323	0.738988	0.744319	0.743032	0.81546	0.827541	0.843194	0.805863	-0.758658	-0.736323	-0.741654	-0.740367	-0.812795	-0.824876	-0.840529	-0.803198
b2831	mutH	b0440	hupB	0.976492	0.761323	0	0.761323	0.737815	0.743426	0.742073	0.814782	0.826946	0.842351	0.805427	-0.761323	-0.737815	-0.743426	-0.742073	-0.814782	-0.826946	-0.842351	-0.805427
b3281	aroE	b0442	ybaV	0.937407	0.993511	0	0.937407	0.930917	0.931324	0.931206	0.914662	0.915849	1.00225	0.95751	-0.937407	-0.930917	-0.931324	-0.931206	-0.914662	-0.915849	-1.00225	-0.95751
b0442	ybaV	b0442	ybaV	0.966497	0.993511	0	0.966497	0.960008	0.960225	0.960161	0.931477	0.930598	1.00801	0.968141	-0.966497	-0.960008	-0.960225	-0.960161	-0.931477	-0.930598	-1.00801	-0.968141
b3549	tag	b0467	priC	0.949952	0.800392	0.264054	0.800392	0.750344	0.760334	0.757881	0.820049	0.831784	0.869212	0.831642	-0.536338	-0.48629	-0.49628	-0.493827	-0.555995	-0.56773	-0.605158	-0.567588
b3933	ftsN	b0543	emrE	0.948462	0.782894	0	0.782894	0.731355	0.742545	0.739851	0.809959	0.822835	0.848006	0.816568	-0.782894	-0.731355	-0.742545	-0.739851	-0.809959	-0.822835	-0.848006	-0.816568
b3009	yghB	b0543	emrE	0.968356	0.782894	0	0.782894	0.75125	0.75812	0.756436	0.821458	0.832922	0.861904	0.821651	-0.782894	-0.75125	-0.75812	-0.756436	-0.821458	-0.832922	-0.861904	-0.821651
b3009	yghB	b0544	ybcK	0.968356	1.00762	0	0.968356	0.975976	0.975735	0.975807	0.939993	0.938146	1.01239	0.97552	-0.968356	-0.975976	-0.975735	-0.975807	-0.939993	-0.938146	-1.01239	-0.97552
b1808	yoaA	b0544	ybcK	0.956501	1.00762	0.0959596	0.956501	0.964121	0.963789	0.963888	0.933141	0.932136	1.01041	0.970727	-0.860541	-0.868161	-0.867829	-0.867928	-0.837181	-0.836176	-0.914451	-0.874767
b4259	holC	b0547	ybcN	0.946225	1.1165	0	0.946225	1.06272	1.05646	1.05847	0.98463	0.977907	1.02983	1.00149	-0.946225	-1.06272	-1.05646	-1.05847	-0.98463	-0.977907	-1.02983	-1.00149
b0760	modF	b0548	ninE	0.883252	1.03451	0	0.883252	0.91776	0.913731	0.914883	0.904985	0.90759	1.00516	0.95999	-0.883252	-0.91776	-0.913731	-0.914883	-0.904985	-0.90759	-1.00516	-0.95999
b3282	tsaC	b0550	rusA	0.973862	0.939971	0	0.939971	0.913832	0.915401	0.914953	0.907493	0.909262	0.989481	0.941969	-0.939971	-0.913832	-0.915401	-0.914953	-0.907493	-0.909262	-0.989481	-0.941969
b4201	priB	b0551	ybcQ	1.0262	0.890186	0.246819	0.890186	0.916388	0.913511	0.914333	0.911486	0.912487	0.980498	0.936949	-0.643367	-0.669569	-0.666692	-0.667514	-0.664667	-0.665668	-0.733679	-0.69013
b1844	exoX	b0681	chiP	0.923769	1.1935	0	0.923769	1.11727	1.10251	1.10741	1.01226	1.00258	1.03537	1.00123	-0.923769	-1.11727	-1.10251	-1.10741	-1.01226	-1.00258	-1.03537	-1.00123
b1114	mfd	b0687	seqA	0.943209	0.952733	0.257586	0.943209	0.895942	0.898626	0.89787	0.896507	0.899697	0.986859	0.938247	-0.685624	-0.638356	-0.64104	-0.640284	-0.638921	-0.642111	-0.729273	-0.680661
b3262	yhdJ	b0687	seqA	0.924584	0.952733	0	0.924584	0.877317	0.880881	0.879893	0.885741	0.890255	0.981312	0.933126	-0.924584	-0.877317	-0.880881	-0.879893	-0.885741	-0.890255	-0.981312	-0.933126
b3066	dnaG	b0687	seqA	0.973921	0.952733	0.000647576	0.952733	0.926654	0.927886	0.92753	0.914259	0.915268	0.99503	0.949563	-0.952085	-0.926006	-0.927238	-0.926882	-0.913611	-0.91462	-0.994382	-0.948915
b0374	yaiU	b0711	ybgJ	1.0068	1.2328	0.445244	1.0068	1.2396	1.24118	1.24061	1.08099	1.06307	1.03922	1.03618	-0.561551	-0.794356	-0.795936	-0.795366	-0.635744	-0.61783	-0.593976	-0.590941
b3262	yhdJ	b0789	clsB	0.924584	1.10289	0	0.924584	1.02747	1.01971	1.02213	0.964944	0.960564	1.02636	0.990599	-0.924584	-1.02747	-1.01971	-1.02213	-0.964944	-0.960564	-1.02636	-0.990599
b4143	groL	b0797	rhlE	1.11065	0.671831	1.06124	0.671831	0.782482	0.74617	0.755017	0.845123	0.853059	0.831486	0.836328	0.389408	0.278757	0.315069	0.306222	0.216116	0.20818	0.229753	0.224911
b4143	groL	b3385	gph	1.11065	0.670797	1.04144	0.670797	0.781448	0.745021	0.753885	0.844577	0.852574	0.830221	0.835443	0.370642	0.259991	0.296418	0.287554	0.196862	0.188865	0.211218	0.205996
b3972	murB	b0797	rhlE	1.10857	0.671831	1.21887	0.671831	0.780404	0.744774	0.75344	0.843922	0.852005	0.829961	0.833764	0.547044	0.438471	0.474101	0.465435	0.374953	0.36687	0.388914	0.385111
b4201	priB	b0797	rhlE	1.0262	0.671831	0.270745	0.671831	0.698033	0.689435	0.691386	0.796311	0.810245	0.767644	0.749757	-0.401086	-0.427288	-0.41869	-0.420641	-0.525566	-0.5395	-0.496899	-0.479012
b3281	aroE	b0839	dacC	0.937407	0.942571	0	0.937407	0.879977	0.883572	0.882573	0.887793	0.891997	0.980025	0.930719	-0.937407	-0.879977	-0.883572	-0.882573	-0.887793	-0.891997	-0.980025	-0.930719
b4363	yjjB	b0876	ybjD	0.960644	1.02303	0.00131941	0.960644	0.983673	0.982767	0.983041	0.943663	0.941452	1.01516	0.979002	-0.959325	-0.982354	-0.981448	-0.981722	-0.942344	-0.940133	-1.01384	-0.977683
b0876	ybjD	b0876	ybjD	0.984632	1.02303	0.122198	0.984632	1.00766	1.00731	1.00742	0.957528	0.953613	1.01849	0.989507	-0.862434	-0.885462	-0.885112	-0.885222	-0.83533	-0.831415	-0.896291	-0.867309
b4201	priB	b0910	cmk	1.0262	0.968271	0.203992	0.968271	0.994473	0.993642	0.993895	0.952673	0.949049	1.01111	0.985542	-0.764278	-0.790481	-0.78965	-0.789903	-0.748681	-0.745057	-0.807122	-0.78155
b1960	vsr	b0912	ihfB	0.968328	0.960913	0.306504	0.960913	0.929241	0.930479	0.93012	0.915341	0.916262	0.996981	0.951881	-0.654409	-0.622737	-0.623975	-0.623616	-0.608837	-0.609758	-0.690477	-0.645377
b0374	yaiU	b0912	ihfB	1.0068	0.960913	0	0.960913	0.967709	0.967443	0.967522	0.937575	0.935765	1.00534	0.97031	-0.960913	-0.967709	-0.967443	-0.967522	-0.937575	-0.935765	-1.00534	-0.97031
b0634	mrdB	b0958	sulA	0.99211	1.08067	0	0.99211	1.07278	1.07214	1.07235	0.992254	0.984394	1.02884	1.01313	-0.99211	-1.07278	-1.07214	-1.07235	-0.992254	-0.984394	-1.02884	-1.01313
b3463	ftsE	b0958	sulA	0.962822	1.08067	0	0.962822	1.04349	1.04049	1.04144	0.975325	0.969545	1.02647	0.999839	-0.962822	-1.04349	-1.04049	-1.04144	-0.975325	-0.969545	-1.02647	-0.999839
b4274	yjgW	b0958	sulA	0.960187	1.08067	0.122054	0.960187	1.04086	1.03764	1.03866	0.973802	0.968209	1.02624	0.998732	-0.838133	-0.918806	-0.915586	-0.916606	-0.851748	-0.846155	-0.904184	-0.876678
b0981	etk	b0981	etk	1.00651	0.810967	0	0.810967	0.817475	0.816244	0.816565	0.858317	0.865409	0.914977	0.863074	-0.810967	-0.817475	-0.816244	-0.816565	-0.858317	-0.865409	-0.914977	-0.863074
b0760	modF	b1055	yceA	0.883252	1.28869	1.38731	0.883252	1.17194	1.13824	1.14972	1.03906	1.02661	1.03867	0.981937	0.504054	0.215366	0.249066	0.237586	0.348248	0.360698	0.348635	0.405369
b2819	recD	b1055	yceA	0.938708	1.28869	1.27431	0.938708	1.2274	1.2097	1.216	1.07111	1.05472	1.03961	1.00227	0.335597	0.0469063	0.0646008	0.0583064	0.203193	0.219582	0.2347	0.272039
b1059	solA	b1055	yceA	0.967288	1.28869	0.0210401	0.967288	1.25598	1.24654	1.24997	1.08763	1.06921	1.03998	1.01383	-0.946248	-1.23494	-1.2255	-1.22893	-1.06659	-1.04817	-1.01894	-0.992788
b1545	pinQ	b1059	solA	0.935733	1.01942	0.000665133	0.935733	0.955148	0.953901	0.95427	0.927358	0.92713	1.01022	0.968361	-0.935068	-0.954483	-0.953236	-0.953605	-0.926693	-0.926465	-1.00955	-0.967696
b0760	modF	b1065	mdtH	0.883252	0.995046	0	0.883252	0.878298	0.878876	0.878716	0.88417	0.889113	0.989799	0.945335	-0.883252	-0.878298	-0.878876	-0.878716	-0.88417	-0.889113	-0.989799	-0.945335
b2954	rdgB	b1114	mfd	0.976373	0.876457	0.00149111	0.876457	0.85283	0.855749	0.854958	0.875443	0.880796	0.953751	0.900273	-0.874966	-0.851339	-0.854258	-0.853467	-0.873952	-0.879305	-0.95226	-0.898782
b4451	ryhB	b1114	mfd	0.909768	0.876457	0.00513137	0.876457	0.786224	0.797372	0.794525	0.836944	0.847028	0.921756	0.883709	-0.871325	-0.781093	-0.792241	-0.789394	-0.831813	-0.841897	-0.916625	-0.878578
b1459	yncM	b1115	ycfT	0.96803	0.868895	0.00762081	0.868895	0.836925	0.841116	0.839997	0.866632	0.873025	0.944494	0.891399	-0.861274	-0.829304	-0.833495	-0.832376	-0.859011	-0.865404	-0.936873	-0.883778
b0712	ybgK	b1159	mcrA	0.977519	0.93235	0.299963	0.93235	0.909869	0.91139	0.910956	0.905587	0.907548	0.986957	0.93885	-0.632388	-0.609906	-0.611427	-0.610993	-0.605624	-0.607585	-0.686994	-0.638887
b0632	dacA	b1238	tdk	0.927222	1.32983	1.24098	0.927222	1.25705	1.23305	1.24171	1.08617	1.06816	1.0403	0.991738	0.313759	-0.0160681	0.00793192	-0.000728083	0.15481	0.17282	0.200679	0.249244
b0632	dacA	b1238	tdk	0.927222	1.32983	1.42172	0.927222	1.25705	1.23305	1.24171	1.08617	1.06816	1.0403	0.991738	0.494495	0.164667	0.188667	0.180007	0.335545	0.353555	0.381414	0.429979
b0760	modF	b1238	tdk	0.883252	1.32983	1.20625	0.883252	1.21308	1.17457	1.18801	1.06076	1.04587	1.03979	0.97612	0.323001	-0.00682724	0.0316828	0.0182428	0.145496	0.160383	0.166467	0.230133
b1633	nth	b1238	tdk	0.92722	1.32983	1.44946	0.92722	1.25705	1.23304	1.24171	1.08617	1.06816	1.0403	0.991738	0.522243	0.192413	0.216423	0.207753	0.363292	0.381302	0.40916	0.457725
b4000	hupA	b1238	tdk	0.916472	1.32983	1.20439	0.916472	1.2463	1.21875	1.22862	1.07996	1.06271	1.04019	0.987753	0.287917	-0.0419108	-0.0143608	-0.0242308	0.124431	0.141677	0.164201	0.216636
b0132	yadD	b3178	ftsH	0.946135	1.31274	1.31229	0.946135	1.25888	1.24203	1.24814	1.08809	1.06975	1.0402	1.00182	0.36615	0.0534052	0.0702511	0.0641413	0.224192	0.242533	0.272084	0.310466
b4451	ryhB	b1238	tdk	0.909768	1.32983	1.47385	0.909768	1.2396	1.20984	1.22044	1.07608	1.05931	1.04011	0.98532	0.564079	0.234247	0.264007	0.253407	0.397764	0.414534	0.433734	0.488527
b4469	ygiQ	b1238	tdk	0.920237	1.32983	1.22009	0.920237	1.25007	1.22376	1.23321	1.08214	1.06462	1.04023	0.989138	0.299849	-0.0299842	-0.00367422	-0.0131242	0.137951	0.155465	0.179857	0.230948
b1239	ychG	b1238	tdk	0.993087	1.32983	0.00479249	0.993087	1.32292	1.32064	1.3215	1.12424	1.10155	1.04087	1.01791	-0.988294	-1.31813	-1.31585	-1.31671	-1.11945	-1.09676	-1.03608	-1.01312
b2650	ypjC	b1266	yciV	0.986936	0.901271	0	0.901271	0.888206	0.889496	0.889136	0.894637	0.897769	0.973661	0.922676	-0.901271	-0.888206	-0.889496	-0.889136	-0.894637	-0.897769	-0.973661	-0.922676
b4259	holC	b1332	ynaJ	0.946225	1.10875	0	0.946225	1.05498	1.04913	1.05099	0.980545	0.97428	1.02891	0.999923	-0.946225	-1.05498	-1.04913	-1.05099	-0.980545	-0.97428	-1.02891	-0.999923
b3390	aroK	b1351	racC	0.983533	0.842637	0.000517401	0.842637	0.82617	0.828761	0.828078	0.861743	0.86859	0.930842	0.877424	-0.84212	-0.825653	-0.828244	-0.827561	-0.861226	-0.868073	-0.930325	-0.876907
b0681	chiP	b1351	racC	0.970921	0.842637	0.000303274	0.842637	0.813558	0.818134	0.81694	0.854453	0.862196	0.924311	0.872284	-0.842334	-0.813255	-0.817831	-0.816637	-0.85415	-0.861893	-0.924008	-0.871981
b1359	ydaU	b1359	ydaU	0.980952	0.815623	0	0.815623	0.796575	0.800087	0.799187	0.846002	0.854633	0.90479	0.854267	-0.815623	-0.796575	-0.800087	-0.799187	-0.846002	-0.854633	-0.90479	-0.854267
b1361	ydaW	b1359	ydaU	0.999397	0.815623	0.342988	0.815623	0.81502	0.815131	0.815102	0.856663	0.863984	0.915337	0.863054	-0.472634	-0.472032	-0.472143	-0.472114	-0.513675	-0.520996	-0.572349	-0.520066
b1546	tfaQ	b1372	stfR	0.994448	0.893036	0.0594955	0.893036	0.887484	0.888078	0.887912	0.894635	0.897722	0.971498	0.920595	-0.833541	-0.827988	-0.828582	-0.828416	-0.835139	-0.838226	-0.912002	-0.861099
b4203	rplI	b1372	stfR	0.917563	0.893036	0.00124536	0.893036	0.810599	0.819417	0.817113	0.850195	0.858743	0.939703	0.895689	-0.891791	-0.809354	-0.818172	-0.815868	-0.84895	-0.857498	-0.938458	-0.894444
b3262	yhdJ	b1428	ydcK	0.924584	0.98868	0.20826	0.924584	0.913264	0.914118	0.913874	0.904703	0.907087	0.997579	0.95144	-0.716324	-0.705004	-0.705858	-0.705614	-0.696443	-0.698827	-0.789319	-0.74318
b1432	ydcM	b1428	ydcK	1.0252	0.98868	0.352186	0.98868	1.01388	1.01359	1.01368	0.962859	0.958096	1.01622	0.995392	-0.636494	-0.661694	-0.661404	-0.661494	-0.610673	-0.60591	-0.664037	-0.643206
b4451	ryhB	b1441	ydcT	0.909768	1.03821	0	0.909768	0.947982	0.944534	0.945546	0.922266	0.922769	1.01113	0.96766	-0.909768	-0.947982	-0.944534	-0.945546	-0.922266	-0.922769	-1.01113	-0.96766
b3262	yhdJ	b1510	ydeK	0.924584	1.18159	0	0.924584	1.10617	1.09248	1.09699	1.00646	0.997413	1.03459	1.00104	-0.924584	-1.10617	-1.09248	-1.09699	-1.00646	-0.997413	-1.03459	-1.00104
b1350	recE	b1568	ydfX	0.966743	1.02476	0.24912	0.966743	0.991505	0.990681	0.990932	0.948103	0.945355	1.01646	0.982234	-0.717623	-0.742385	-0.741561	-0.741812	-0.698983	-0.696235	-0.767339	-0.733114
b1808	yoaA	b1626	ydgK	0.956501	1.01245	0	0.956501	0.968953	0.968411	0.968573	0.93569	0.934399	1.01177	0.972865	-0.956501	-0.968953	-0.968411	-0.968573	-0.93569	-0.934399	-1.01177	-0.972865
b4441	glmY	b1627	rsxA	0.994726	0.82145	0	0.82145	0.816177	0.817118	0.816872	0.857037	0.864344	0.918121	0.865493	-0.82145	-0.816177	-0.817118	-0.816872	-0.857037	-0.864344	-0.918121	-0.865493
b3362	yhfG	b1630	rsxD	0.959706	0.781211	0.0769332	0.781211	0.740916	0.749732	0.747592	0.81557	0.827748	0.853959	0.817661	-0.704277	-0.663983	-0.672799	-0.670659	-0.738637	-0.750815	-0.777026	-0.740728
b1626	ydgK	b1633	nth	0.97668	1.06431	0.196697	0.97668	1.04099	1.03949	1.03996	0.974706	0.968911	1.02525	1.00102	-0.779984	-0.844293	-0.842793	-0.843263	-0.778009	-0.772214	-0.828557	-0.80432
b0789	clsB	b1652	rnt	0.952414	0.730684	0.243009	0.730684	0.683098	0.695914	0.692994	0.784704	0.800393	0.786227	0.77144	-0.487676	-0.440089	-0.452905	-0.449985	-0.541695	-0.557384	-0.543218	-0.528431
b3706	mnmE	b1656	sodB	0.99711	0.915236	0.00160975	0.915236	0.912346	0.912591	0.912521	0.907884	0.909467	0.984361	0.937168	-0.913627	-0.910736	-0.910981	-0.910911	-0.906274	-0.907857	-0.982751	-0.935558
b2160	yeiI	b1656	sodB	1.01019	0.915236	0.0210179	0.915236	0.925427	0.924564	0.924813	0.915445	0.916099	0.98813	0.944299	-0.894219	-0.904409	-0.903546	-0.903795	-0.894427	-0.895081	-0.967112	-0.923281
b0181	lpxA	b1656	sodB	0.984594	0.915236	0.000688833	0.915236	0.89983	0.901136	0.900767	0.900649	0.903121	0.98054	0.931025	-0.914548	-0.899141	-0.900447	-0.900078	-0.89996	-0.902432	-0.979851	-0.930336
b0374	yaiU	b1712	ihfA	1.0068	0.814593	0	0.814593	0.821388	0.820128	0.820458	0.860396	0.867252	0.918472	0.866292	-0.814593	-0.821388	-0.820128	-0.820458	-0.860396	-0.867252	-0.918472	-0.866292
b3996	nudC	b1712	ihfA	0.962521	0.814593	0	0.814593	0.777114	0.784063	0.782312	0.834805	0.844806	0.892635	0.846726	-0.814593	-0.777114	-0.784063	-0.782312	-0.834805	-0.844806	-0.892635	-0.846726
b1755	ynjC	b1728	ydjM	0.981759	0.889276	0.00517404	0.889276	0.871035	0.873055	0.872499	0.885318	0.889529	0.964535	0.91188	-0.884102	-0.865861	-0.867881	-0.867325	-0.880144	-0.884355	-0.959361	-0.906706
b1545	pinQ	b1758	ynjF	0.935733	1.10552	0.0444092	0.935733	1.04126	1.03448	1.03661	0.972778	0.967449	1.02768	0.995204	-0.891324	-0.996851	-0.990071	-0.992201	-0.928369	-0.92304	-0.983267	-0.950795
b3281	aroE	b1759	nudG	0.937407	0.890938	0	0.890938	0.828344	0.835171	0.833359	0.860558	0.867821	0.947269	0.898031	-0.890938	-0.828344	-0.835171	-0.833359	-0.860558	-0.867821	-0.947269	-0.898031
b1758	ynjF	b1759	nudG	0.985481	0.890938	0.0082359	0.890938	0.876419	0.878002	0.877564	0.888346	0.892194	0.966981	0.914755	-0.882702	-0.868183	-0.869766	-0.869328	-0.88011	-0.883958	-0.958745	-0.906519
b2827	thyA	b1844	exoX	0.988639	0.870078	0.393121	0.870078	0.858716	0.860192	0.859791	0.879168	0.884027	0.954443	0.900999	-0.476956	-0.465595	-0.467071	-0.46667	-0.486047	-0.490906	-0.561322	-0.507878
b4331	kptA	b1848	yebG	0.991258	0.561404	0.977582	0.561404	0.552661	0.556496	0.555773	0.717866	0.740823	0.622142	0.628182	0.416178	0.424921	0.421086	0.421809	0.259716	0.236759	0.35544	0.3494
b3645	dinD	b1848	yebG	0.983493	0.561404	0.916215	0.561404	0.544897	0.552136	0.550783	0.713378	0.736886	0.61826	0.625326	0.354811	0.371318	0.364079	0.365432	0.202837	0.179329	0.297955	0.290889
b0190	yaeQ	b1848	yebG	0.962066	0.561404	0.914698	0.561404	0.52347	0.540107	0.537062	0.700993	0.726023	0.608077	0.620746	0.353295	0.391228	0.374591	0.377636	0.213705	0.188675	0.306621	0.293952
b1759	nudG	b1848	yebG	0.987171	0.561404	0.903971	0.561404	0.548575	0.554202	0.553146	0.715504	0.738751	0.620086	0.6266	0.342567	0.355396	0.349769	0.350825	0.188467	0.16522	0.283885	0.277371
b4378	yjjV	b1848	yebG	0.989324	0.561404	1.06186	0.561404	0.550727	0.55541	0.55453	0.716748	0.739842	0.621165	0.627411	0.500457	0.511134	0.506451	0.507331	0.345113	0.322019	0.440696	0.43445
b4389	radA	b1848	yebG	0.996954	0.561404	0.953434	0.561404	0.558357	0.559694	0.55944	0.721159	0.74371	0.625054	0.63068	0.392031	0.395077	0.39374	0.393994	0.232275	0.209724	0.32838	0.322754
b1352	kilR	b1848	yebG	1.00634	0.561404	1.051	0.561404	0.567745	0.564964	0.565495	0.726585	0.74847	0.629975	0.635537	0.489592	0.483251	0.486032	0.485501	0.324411	0.302526	0.421021	0.415459
b3023	ygiV	b1848	yebG	0.985028	0.561404	0.939619	0.561404	0.546432	0.552998	0.551769	0.714266	0.737664	0.619019	0.625841	0.378216	0.393187	0.386621	0.38785	0.225353	0.201955	0.3206	0.313778
b4372	holD	b1848	yebG	0.980126	0.561404	0.943082	0.561404	0.541529	0.550246	0.548622	0.711432	0.735179	0.616608	0.624286	0.381679	0.401553	0.392836	0.39446	0.23165	0.207903	0.326474	0.318796
b0634	mrdB	b1848	yebG	0.99211	0.561404	1.06376	0.561404	0.553513	0.556974	0.556322	0.718359	0.741254	0.622574	0.628534	0.502352	0.510243	0.506782	0.507434	0.345397	0.322502	0.441182	0.435222
b2124	yehS	b1848	yebG	0.971378	0.561404	1.01809	0.561404	0.532781	0.545335	0.543016	0.706375	0.730744	0.612407	0.622143	0.456689	0.485312	0.472758	0.475077	0.311718	0.287349	0.405686	0.39595
b2930	yggF	b1848	yebG	0.962851	0.561404	0.977906	0.561404	0.524254	0.540548	0.537563	0.701447	0.726421	0.608436	0.620829	0.416503	0.453652	0.437358	0.440343	0.276459	0.251485	0.36947	0.357077
b1610	tus	b1848	yebG	0.985	0.561404	1.08739	0.561404	0.546403	0.552982	0.551751	0.714249	0.73765	0.619005	0.625831	0.525983	0.540984	0.534405	0.535636	0.373138	0.349737	0.468382	0.461556
b2698	recX	b1848	yebG	0.985106	0.561404	0.981152	0.561404	0.54651	0.553042	0.551819	0.714311	0.737704	0.619058	0.625867	0.419748	0.434642	0.42811	0.429333	0.266841	0.243448	0.362094	0.355285
b1963	yedR	b1848	yebG	0.991343	0.561404	0.931474	0.561404	0.552747	0.556544	0.555828	0.717916	0.740866	0.622185	0.628217	0.370071	0.378727	0.37493	0.375646	0.213558	0.190608	0.309289	0.303257
b0422	xseB	b1848	yebG	0.993677	0.561404	1.04739	0.561404	0.555081	0.557854	0.55733	0.719265	0.742049	0.623372	0.629202	0.485988	0.492311	0.489538	0.490062	0.328127	0.305343	0.42402	0.41819
b2565	recO	b1848	yebG	0.988384	0.561404	0.904355	0.561404	0.549787	0.554882	0.553925	0.716205	0.739365	0.620693	0.627051	0.342951	0.354568	0.349473	0.35043	0.18815	0.16499	0.283662	0.277304
b0258	ykfC	b1848	yebG	0.998515	0.561404	0.964209	0.561404	0.559919	0.56057	0.560447	0.722061	0.744502	0.625862	0.631425	0.402806	0.40429	0.403639	0.403762	0.242148	0.219707	0.338347	0.332784
b3638	yicR	b1848	yebG	0.980995	0.561404	0.941547	0.561404	0.542398	0.550734	0.549179	0.711934	0.735619	0.617033	0.624543	0.380144	0.399149	0.390813	0.392368	0.229613	0.205928	0.324514	0.317004
b0088	murD	b1848	yebG	1.04545	0.561404	1	0.561404	0.606857	0.586921	0.590872	0.749192	0.768299	0.65207	0.66527	0.438596	0.393143	0.413079	0.409128	0.250808	0.231701	0.34793	0.33473
b4313	fimE	b1848	yebG	0.989876	0.561404	1.04051	0.561404	0.55128	0.55572	0.554885	0.717068	0.740122	0.621443	0.627627	0.479108	0.489231	0.484791	0.485626	0.323443	0.300389	0.419068	0.412884
b3701	dnaN	b1848	yebG	0.977777	0.561404	1.07913	0.561404	0.539181	0.548928	0.547115	0.710074	0.733988	0.615468	0.623631	0.517728	0.539951	0.530204	0.532017	0.369058	0.345144	0.463664	0.455501
b2236	yfaE	b1848	yebG	0.969391	0.561404	0.884439	0.561404	0.530795	0.54422	0.541744	0.705227	0.729737	0.611471	0.621768	0.323036	0.353644	0.340219	0.342695	0.179212	0.154702	0.272968	0.262671
b0180	fabZ	b1848	yebG	0.972737	0.561404	0.963206	0.561404	0.53414	0.546098	0.543886	0.707161	0.731433	0.613051	0.622423	0.401802	0.429066	0.417108	0.41932	0.256045	0.231773	0.350155	0.340783
b1631	rsxG	b1848	yebG	0.987213	0.561404	0.912055	0.561404	0.548616	0.554225	0.553172	0.715528	0.738772	0.620107	0.626615	0.350651	0.363439	0.35783	0.358883	0.196527	0.173283	0.291948	0.28544
b0634	mrdB	b1848	yebG	0.99211	0.561404	1.04587	0.561404	0.553513	0.556974	0.556322	0.718359	0.741254	0.622574	0.628534	0.484466	0.492357	0.488896	0.489548	0.327511	0.304616	0.423296	0.417336
b0799	dinG	b1848	yebG	0.997029	0.561404	0.930823	0.561404	0.558433	0.559736	0.559489	0.721202	0.743749	0.625093	0.630716	0.369419	0.37239	0.371087	0.371334	0.209621	0.187074	0.30573	0.300107
b0297	eaeH	b1848	yebG	0.99361	0.561404	0.966814	0.561404	0.555013	0.557816	0.557287	0.719226	0.742015	0.623338	0.629172	0.40541	0.411801	0.408998	0.409527	0.247588	0.224799	0.343476	0.337642
b1756	ynjD	b1848	yebG	0.974681	0.561404	1.02892	0.561404	0.536085	0.54719	0.545131	0.708285	0.732419	0.613979	0.622857	0.467514	0.492833	0.481728	0.483787	0.320633	0.296499	0.414939	0.406061
b1087	yceF	b1848	yebG	0.995096	0.561404	0.926805	0.561404	0.5565	0.558651	0.558244	0.720085	0.742768	0.624098	0.629828	0.365401	0.370305	0.368154	0.368561	0.20672	0.184037	0.302707	0.296977
b3158	yhbU	b1848	yebG	0.98135	0.561404	0.916182	0.561404	0.542754	0.550934	0.549407	0.71214	0.735799	0.617206	0.62465	0.354778	0.373428	0.365248	0.366775	0.204042	0.180383	0.298976	0.291532
b1352	kilR	b1848	yebG	1.00634	0.561404	1.0574	0.561404	0.567745	0.564964	0.565495	0.726585	0.74847	0.629975	0.635537	0.495998	0.489657	0.492438	0.491907	0.330817	0.308932	0.427427	0.421865
b2170	setB	b1848	yebG	0.991896	0.561404	1.05386	0.561404	0.5533	0.556854	0.556184	0.718235	0.741146	0.622465	0.628445	0.492452	0.500555	0.497001	0.497671	0.33562	0.312709	0.43139	0.42541
b2412	zipA	b1848	yebG	1.07748	0.561404	1.00007	0.561404	0.638879	0.604899	0.611827	0.767701	0.784533	0.671999	0.699787	0.438665	0.361189	0.395169	0.388241	0.232367	0.215535	0.328069	0.300281
b0422	xseB	b1848	yebG	0.993677	0.561404	1.06912	0.561404	0.555081	0.557854	0.55733	0.719265	0.742049	0.623372	0.629202	0.50772	0.514043	0.51127	0.511794	0.349859	0.327075	0.445752	0.439922
b3652	recG	b1848	yebG	0.973705	0.561404	0.998674	0.561404	0.535109	0.546642	0.544506	0.707721	0.731924	0.613512	0.622634	0.43727	0.463565	0.452032	0.454168	0.290953	0.26675	0.385162	0.37604
b2467	nudK	b1848	yebG	0.977258	0.561404	0.994983	0.561404	0.538661	0.548636	0.546782	0.709774	0.733725	0.615217	0.623494	0.433579	0.456322	0.446347	0.448201	0.285209	0.261258	0.379766	0.371489
b0132	yadD	b1848	yebG	0.974925	0.561404	0.983861	0.561404	0.536329	0.547327	0.545288	0.708426	0.732542	0.614095	0.622914	0.422458	0.447532	0.436534	0.438573	0.275435	0.251319	0.369766	0.360947
b2271	yfbL	b1848	yebG	0.98423	0.561404	1.00308	0.561404	0.545634	0.55255	0.551256	0.713804	0.73726	0.618624	0.62557	0.441675	0.457445	0.450529	0.451823	0.289275	0.265819	0.384455	0.377509
b1365	ynaK	b1848	yebG	0.988486	0.561404	1.04294	0.561404	0.54989	0.55494	0.553991	0.716264	0.739417	0.620744	0.62709	0.481541	0.493055	0.488005	0.488954	0.326681	0.303528	0.422201	0.415855
b2892	recJ	b1848	yebG	0.986632	0.561404	1.01668	0.561404	0.548035	0.553899	0.552799	0.715192	0.738477	0.619817	0.626404	0.455275	0.468643	0.462779	0.463879	0.301486	0.278201	0.396861	0.390274
b0397	sbcC	b1848	yebG	0.993285	0.561404	0.907001	0.561404	0.554689	0.557634	0.557078	0.719038	0.74185	0.623172	0.629032	0.345597	0.352312	0.349367	0.349923	0.187963	0.165151	0.283829	0.277969
b1374	pinR	b1848	yebG	0.995386	0.561404	0.996931	0.561404	0.556789	0.558813	0.55843	0.720252	0.742915	0.624247	0.629959	0.435528	0.440142	0.438118	0.438501	0.276679	0.254016	0.372684	0.366972
b3189	murA	b1848	yebG	0.969584	0.561404	0.950899	0.561404	0.530987	0.544328	0.541867	0.705339	0.729834	0.611562	0.621803	0.389495	0.419912	0.406571	0.409032	0.24556	0.221065	0.339337	0.329096
b0634	mrdB	b1848	yebG	0.99211	0.561404	0.943437	0.561404	0.553513	0.556974	0.556322	0.718359	0.741254	0.622574	0.628534	0.382033	0.389924	0.386463	0.387115	0.225078	0.202183	0.320863	0.314903
b1065	mdtH	b1848	yebG	0.970324	0.561404	0.886587	0.561404	0.531727	0.544743	0.542341	0.705766	0.730209	0.61191	0.621939	0.325184	0.35486	0.341844	0.344246	0.180821	0.156378	0.274677	0.264648
b1460	ydcC	b1848	yebG	0.982487	0.561404	0.894174	0.561404	0.543891	0.551572	0.550137	0.712797	0.736376	0.617765	0.625003	0.33277	0.350283	0.342602	0.344037	0.181377	0.157798	0.276409	0.269171
b4532	hicA	b1848	yebG	0.973431	0.561404	0.956641	0.561404	0.534834	0.546488	0.54433	0.707562	0.731785	0.613382	0.622573	0.395237	0.421807	0.410153	0.412311	0.249079	0.224856	0.343259	0.334068
b4378	yjjV	b1848	yebG	0.989324	0.561404	1.05556	0.561404	0.550727	0.55541	0.55453	0.716748	0.739842	0.621165	0.627411	0.494159	0.504836	0.500153	0.501033	0.338815	0.315721	0.434398	0.428152
b3162	deaD	b1848	yebG	0.986649	0.561404	0.947717	0.561404	0.548053	0.553908	0.55281	0.715202	0.738486	0.619825	0.62641	0.386313	0.399664	0.393809	0.394907	0.232515	0.209231	0.327892	0.321307
b2002	yeeS	b1848	yebG	0.987206	0.561404	1.00541	0.561404	0.548609	0.554221	0.553168	0.715524	0.738768	0.620103	0.626612	0.444011	0.456806	0.451194	0.452247	0.289891	0.266647	0.385312	0.378803
b0148	hrpB	b1848	yebG	0.995036	0.561404	0.897872	0.561404	0.556439	0.558617	0.558205	0.72005	0.742738	0.624067	0.629801	0.336468	0.341433	0.339255	0.339667	0.177822	0.155134	0.273805	0.268071
b4465	yggP	b1848	yebG	0.985195	0.561404	0.926964	0.561404	0.546599	0.553092	0.551876	0.714362	0.737749	0.619102	0.625898	0.36556	0.380365	0.373872	0.375088	0.212602	0.189215	0.307862	0.301066
b2894	xerD	b1848	yebG	1.00921	0.561404	0.951062	0.561404	0.570617	0.566576	0.567351	0.728245	0.749926	0.63151	0.637205	0.389658	0.380445	0.384486	0.383711	0.222817	0.201136	0.319552	0.313857
b0132	yadD	b1848	yebG	0.974925	0.561404	0.964247	0.561404	0.536329	0.547327	0.545288	0.708426	0.732542	0.614095	0.622914	0.402843	0.427918	0.41692	0.418959	0.255821	0.231705	0.350152	0.341333
b4372	holD	b1848	yebG	0.980126	0.561404	0.916055	0.561404	0.541529	0.550246	0.548622	0.711432	0.735179	0.616608	0.624286	0.354652	0.374526	0.365809	0.367433	0.204623	0.180876	0.299447	0.291769
b3282	tsaC	b1848	yebG	0.973862	0.561404	0.89185	0.561404	0.535265	0.54673	0.544606	0.707811	0.732003	0.613587	0.622669	0.330446	0.356585	0.34512	0.347244	0.184039	0.159847	0.278263	0.269181
b3780	rhlB	b1848	yebG	0.975475	0.561404	0.936138	0.561404	0.536879	0.547635	0.54564	0.708744	0.732821	0.614359	0.623046	0.374734	0.399259	0.388503	0.390498	0.227394	0.203317	0.321779	0.313092
b2648	pinH	b1848	yebG	0.98182	0.561404	0.886406	0.561404	0.543223	0.551197	0.549709	0.712411	0.736038	0.617437	0.624794	0.325002	0.343183	0.335209	0.336697	0.173995	0.150368	0.268969	0.261612
b0226	dinJ	b1848	yebG	0.993863	0.561404	0.910536	0.561404	0.555267	0.557958	0.55745	0.719372	0.742143	0.623467	0.629283	0.349132	0.355269	0.352578	0.353086	0.191164	0.168393	0.287069	0.281253
b3385	gph	b1848	yebG	1.0073	0.561404	1.10952	0.561404	0.568699	0.565499	0.566111	0.727136	0.748953	0.630483	0.636082	0.548118	0.540822	0.544022	0.54341	0.382385	0.360568	0.479038	0.473439
b0396	araJ	b1848	yebG	0.987742	0.561404	0.895042	0.561404	0.549146	0.554522	0.553513	0.715834	0.73904	0.620371	0.62681	0.333639	0.345896	0.34052	0.341529	0.179208	0.156002	0.274671	0.268232
b3699	gyrB	b1848	yebG	0.982963	0.561404	0.890018	0.561404	0.544367	0.551839	0.550443	0.713072	0.736617	0.617999	0.625155	0.328615	0.345651	0.338179	0.339575	0.176946	0.153401	0.272019	0.264863
b2184	radD	b1848	yebG	0.980622	0.561404	0.904546	0.561404	0.542025	0.550525	0.54894	0.711719	0.73543	0.61685	0.624432	0.343142	0.362521	0.354021	0.355606	0.192827	0.169116	0.287696	0.280114
b1961	dcm	b1848	yebG	0.979949	0.561404	0.891189	0.561404	0.541353	0.550147	0.548509	0.71133	0.735089	0.616522	0.624235	0.329785	0.349836	0.341042	0.34268	0.179859	0.1561	0.274667	0.266954
b3068	mug	b1848	yebG	0.988112	0.561404	0.922411	0.561404	0.549516	0.55473	0.553751	0.716048	0.739228	0.620557	0.626949	0.361007	0.372895	0.367681	0.36866	0.206363	0.183183	0.301854	0.295462
b3023	ygiV	b1848	yebG	0.985028	0.561404	0.928606	0.561404	0.546432	0.552998	0.551769	0.714266	0.737664	0.619019	0.625841	0.367202	0.382174	0.375608	0.376837	0.21434	0.190942	0.309587	0.302765
b4331	kptA	b1848	yebG	0.991258	0.561404	0.947855	0.561404	0.552661	0.556496	0.555773	0.717866	0.740823	0.622142	0.628182	0.386451	0.395194	0.391359	0.392082	0.229989	0.207032	0.325713	0.319673
b0622	pagP	b1848	yebG	0.976221	0.561404	0.910944	0.561404	0.537624	0.548054	0.546118	0.709175	0.733199	0.614717	0.623229	0.34954	0.37332	0.36289	0.364826	0.201769	0.177745	0.296227	0.287715
b2184	radD	b1848	yebG	0.980622	0.561404	0.898599	0.561404	0.542025	0.550525	0.54894	0.711719	0.73543	0.61685	0.624432	0.337195	0.356574	0.348074	0.349659	0.18688	0.163169	0.281749	0.274167
b0714	nei	b1848	yebG	0.980436	0.561404	0.947107	0.561404	0.54184	0.55042	0.548821	0.711611	0.735336	0.61676	0.624377	0.385704	0.405267	0.396687	0.398286	0.235496	0.211771	0.330347	0.32273
b3248	yhdE	b1848	yebG	0.992278	0.561404	1.08312	0.561404	0.553682	0.557069	0.55643	0.718456	0.74134	0.622659	0.628605	0.521713	0.529434	0.526047	0.526686	0.36466	0.341776	0.460457	0.454511
b0547	ybcN	b1848	yebG	0.979004	0.561404	0.924329	0.561404	0.540408	0.549616	0.547902	0.710784	0.73461	0.616062	0.623966	0.362925	0.383921	0.374713	0.376427	0.213545	0.189719	0.308267	0.300363
b2648	pinH	b1848	yebG	0.98182	0.561404	1.0324	0.561404	0.543223	0.551197	0.549709	0.712411	0.736038	0.617437	0.624794	0.471	0.48918	0.481206	0.482694	0.319992	0.296365	0.414966	0.407609
b2961	mutY	b1848	yebG	0.978816	0.561404	1.00561	0.561404	0.54022	0.549511	0.547782	0.710675	0.734515	0.615971	0.623914	0.444206	0.46539	0.456099	0.457828	0.294935	0.271095	0.389639	0.381696
b0060	polB	b1848	yebG	0.996417	0.561404	0.988493	0.561404	0.557821	0.559392	0.559095	0.720848	0.743438	0.624777	0.63043	0.427089	0.430672	0.429101	0.429398	0.267645	0.245055	0.363716	0.358063
b1350	recE	b1848	yebG	0.966743	0.561404	0.870594	0.561404	0.528147	0.542733	0.540051	0.703697	0.728394	0.610234	0.621334	0.30919	0.342447	0.327861	0.330543	0.166897	0.1422	0.26036	0.24926
b2159	nfo	b1848	yebG	0.987379	0.561404	0.914374	0.561404	0.548783	0.554318	0.553279	0.715624	0.738856	0.62019	0.626676	0.352971	0.365591	0.360056	0.361095	0.19875	0.175518	0.294184	0.287698
b3908	sodA	b1848	yebG	0.991124	0.561404	0.928551	0.561404	0.552528	0.556421	0.555687	0.717789	0.740755	0.622074	0.628127	0.367148	0.376023	0.37213	0.372864	0.210762	0.187796	0.306477	0.300424
b0215	dnaQ	b1848	yebG	0.989876	0.561404	0.925848	0.561404	0.551279	0.55572	0.554884	0.717067	0.740122	0.621443	0.627627	0.364445	0.374569	0.370128	0.370964	0.208781	0.185726	0.304405	0.298221
b0714	nei	b1848	yebG	0.980436	0.561404	0.966754	0.561404	0.54184	0.55042	0.548821	0.711611	0.735336	0.61676	0.624377	0.40535	0.424914	0.416334	0.417933	0.255143	0.231418	0.349994	0.342377
b2395	pdeA	b1848	yebG	0.943898	0.561404	0	0.561404	0.505302	0.529908	0.525485	0.690492	0.716812	0.600045	0.62061	-0.561404	-0.505302	-0.529908	-0.525485	-0.690492	-0.716812	-0.600045	-0.62061
b4062	soxS	b1861	ruvA	0.963168	0.817814	0.369955	0.817814	0.780982	0.787692	0.785994	0.836878	0.846642	0.896331	0.849583	-0.447858	-0.411027	-0.417737	-0.416039	-0.466923	-0.476687	-0.526376	-0.479628
b1763	topB	b1861	ruvA	0.950757	0.817814	0.303081	0.817814	0.768571	0.777542	0.775298	0.829704	0.84035	0.888642	0.846187	-0.514733	-0.46549	-0.474461	-0.472217	-0.526623	-0.537269	-0.585561	-0.543106
b3013	yqhG	b1861	ruvA	0.990808	0.817814	0	0.817814	0.808622	0.810296	0.809863	0.852854	0.860655	0.912569	0.860536	-0.817814	-0.808622	-0.810296	-0.809863	-0.852854	-0.860655	-0.912569	-0.860536
b4438	cyaR	b1861	ruvA	0.976804	0.817814	0	0.817814	0.794617	0.798843	0.797762	0.84476	0.853555	0.904498	0.854401	-0.817814	-0.794617	-0.798843	-0.797762	-0.84476	-0.853555	-0.904498	-0.854401
b4062	soxS	b1861	ruvA	0.963168	0.817814	0.402934	0.817814	0.780982	0.787692	0.785994	0.836878	0.846642	0.896331	0.849583	-0.41488	-0.378048	-0.384758	-0.38306	-0.433944	-0.443708	-0.493397	-0.446649
b0779	uvrB	b1863	ruvC	0.95374	0.799356	0.321666	0.799356	0.753096	0.762378	0.760094	0.821693	0.83322	0.870596	0.831634	-0.47769	-0.43143	-0.440712	-0.438428	-0.500027	-0.511554	-0.54893	-0.509968
b1844	exoX	b1863	ruvC	0.923769	0.799356	0	0.799356	0.723125	0.73842	0.734758	0.804369	0.818025	0.849948	0.827287	-0.799356	-0.723125	-0.73842	-0.734758	-0.804369	-0.818025	-0.849948	-0.827287
b1844	exoX	b1865	nudB	0.923769	0.95092	0.25619	0.923769	0.874689	0.87843	0.877395	0.884314	0.888993	0.980111	0.931936	-0.667579	-0.618499	-0.62224	-0.621205	-0.628124	-0.632803	-0.723921	-0.675746
b2412	zipA	b2009	sbmC	1.07748	0.902853	0.000902925	0.902853	0.980328	0.972802	0.975065	0.947804	0.944412	0.999846	0.983	-0.90195	-0.979425	-0.971899	-0.974162	-0.946901	-0.943509	-0.998943	-0.982097
b1844	exoX	b2009	sbmC	0.923769	0.902853	0	0.902853	0.826622	0.834028	0.832065	0.858961	0.866486	0.95003	0.903117	-0.902853	-0.826622	-0.834028	-0.832065	-0.858961	-0.866486	-0.95003	-0.903117
b2002	yeeS	b2009	sbmC	0.987206	0.902853	0.254274	0.902853	0.890059	0.891302	0.890954	0.895627	0.898647	0.974654	0.923894	-0.648579	-0.635785	-0.637028	-0.63668	-0.641353	-0.644373	-0.72038	-0.66962
b0687	seqA	b2011	sbcB	0.966719	0.882419	0	0.882419	0.849138	0.853051	0.851994	0.873008	0.878693	0.95387	0.900831	-0.882419	-0.849138	-0.853051	-0.851994	-0.873008	-0.878693	-0.95387	-0.900831
b0081	mraZ	b2011	sbcB	0.974165	0.882419	0.00400823	0.882419	0.856584	0.859622	0.858796	0.877312	0.882468	0.956984	0.903717	-0.87841	-0.852576	-0.855614	-0.854788	-0.873304	-0.87846	-0.952976	-0.899709
b1755	ynjC	b2011	sbcB	0.981759	0.882419	0.00234147	0.882419	0.864178	0.866323	0.865736	0.881701	0.886318	0.960068	0.906945	-0.880077	-0.861837	-0.863982	-0.863395	-0.87936	-0.883977	-0.957727	-0.904604
b1574	dicF	b2160	yeiI	0.969612	0.904111	0	0.904111	0.873723	0.876637	0.875832	0.886122	0.890317	0.969215	0.917131	-0.904111	-0.873723	-0.876637	-0.875832	-0.886122	-0.890317	-0.969215	-0.917131
b2547	yphE	b2213	ada	0.978713	0.837355	0.384867	0.837355	0.816068	0.81953	0.818625	0.85617	0.863673	0.923777	0.871135	-0.452488	-0.431201	-0.434663	-0.433758	-0.471303	-0.478806	-0.53891	-0.486268
b0549	ybcO	b2271	yfbL	0.980724	0.890149	0.408157	0.890149	0.870873	0.87299	0.872407	0.88518	0.889413	0.964695	0.912042	-0.481992	-0.462716	-0.464833	-0.46425	-0.477023	-0.481256	-0.556538	-0.503885
b4062	soxS	b2358	yfdO	0.963168	0.929747	0.0645699	0.929747	0.892916	0.895503	0.894776	0.895919	0.899054	0.9814	0.931392	-0.865177	-0.828346	-0.830933	-0.830206	-0.831349	-0.834484	-0.91683	-0.866822
b3009	yghB	b2576	srmB	0.968356	0.967862	0	0.967862	0.936218	0.937235	0.936938	0.919022	0.91953	0.999669	0.955724	-0.967862	-0.936218	-0.937235	-0.936938	-0.919022	-0.91953	-0.999669	-0.955724
b2113	mrp	b2676	nrdF	0.995321	1.01846	0.014036	0.995321	1.01378	1.0137	1.01372	0.961298	0.956894	1.01889	0.992774	-0.981285	-0.999744	-0.999664	-0.999684	-0.947262	-0.942858	-1.00485	-0.978738
b0015	dnaJ	b2758	casC	0.989485	0.895221	0.429652	0.895221	0.884706	0.885808	0.885501	0.892919	0.896229	0.97103	0.919679	-0.465569	-0.455054	-0.456156	-0.455849	-0.463267	-0.466577	-0.541378	-0.490027
b3863	polA	b2820	recB	0.986339	0.838298	0.236886	0.838298	0.824637	0.826846	0.826264	0.861076	0.867981	0.928582	0.875219	-0.601411	-0.587751	-0.58996	-0.589378	-0.62419	-0.631095	-0.691696	-0.638333
b3095	yqjA	b2830	rppH	0.939631	0.863956	0.219033	0.863956	0.803587	0.811799	0.80967	0.847612	0.856315	0.926534	0.879418	-0.644922	-0.584554	-0.592766	-0.590637	-0.628579	-0.637282	-0.707501	-0.660385
b2879	ssnA	b2879	ssnA	0.984847	0.717231	0.000549776	0.717231	0.702077	0.706362	0.705372	0.796354	0.810536	0.793872	0.768461	-0.716681	-0.701527	-0.705812	-0.704822	-0.795804	-0.809986	-0.793322	-0.767911
b2395	pdeA	b2900	yqfB	0.943898	1.05329	0	0.943898	0.997192	0.994202	0.995116	0.949948	0.947133	1.01972	0.98388	-0.943898	-0.997192	-0.994202	-0.995116	-0.949948	-0.947133	-1.01972	-0.98388
b2900	yqfB	b2900	yqfB	0.987801	1.05329	0.0482885	0.987801	1.04109	1.04044	1.04065	0.975324	0.969391	1.02456	1.00254	-0.939512	-0.992802	-0.992152	-0.992362	-0.927036	-0.921103	-0.976272	-0.954249
b0065	yabI	b2916	argP	0.991809	0.73649	0	0.73649	0.728298	0.730457	0.729944	0.810537	0.823084	0.823303	0.789308	-0.73649	-0.728298	-0.730457	-0.729944	-0.810537	-0.823084	-0.823303	-0.789308
b3009	yghB	b2928	yggC	0.968356	1.10827	0	0.968356	1.07662	1.0732	1.07431	0.99308	0.985272	1.0304	1.00903	-0.968356	-1.07662	-1.0732	-1.07431	-0.99308	-0.985272	-1.0304	-1.00903
b2893	dsbC	b2930	yggF	0.935336	0.987718	0	0.935336	0.923054	0.923848	0.923619	0.91041	0.912087	0.999684	0.954107	-0.935336	-0.923054	-0.923848	-0.923619	-0.91041	-0.912087	-0.999684	-0.954107
b0088	murD	b2945	endA	1.04545	0.885904	0	0.885904	0.931357	0.926171	0.92767	0.920355	0.920241	0.984201	0.947171	-0.885904	-0.931357	-0.926171	-0.92767	-0.920355	-0.920241	-0.984201	-0.947171
b0085	murE	b2962	yggX	1.19361	0.745	1.27969	0.745	0.938611	0.88924	0.90315	0.931669	0.929378	0.952975	0.991294	0.534692	0.341081	0.390452	0.376542	0.348023	0.350314	0.326717	0.288398
b2827	thyA	b2962	yggX	0.988639	0.745	0	0.745	0.733639	0.736536	0.735843	0.813194	0.825461	0.831424	0.795637	-0.745	-0.733639	-0.736536	-0.735843	-0.813194	-0.825461	-0.831424	-0.795637
b2893	dsbC	b2964	nupG	0.935336	0.783234	0	0.783234	0.718569	0.732586	0.729252	0.802551	0.81634	0.839003	0.814933	-0.783234	-0.718569	-0.732586	-0.729252	-0.802551	-0.81634	-0.839003	-0.814933
b0086	murF	b3033	yqiB	1.02363	1.12029	0.000878782	1.02363	1.14392	1.14676	1.14579	1.03137	1.01892	1.03446	1.03801	-1.02275	-1.14304	-1.14588	-1.14491	-1.03049	-1.01805	-1.03358	-1.03713
b4000	hupA	b3043	ygiL	0.916472	0.967027	0.124629	0.916472	0.883499	0.886253	0.885486	0.888592	0.892835	0.986021	0.938789	-0.791843	-0.75887	-0.761624	-0.760857	-0.763963	-0.768206	-0.861392	-0.81416
b2893	dsbC	b3043	ygiL	0.935336	0.967027	0.233091	0.935336	0.902363	0.904495	0.903891	0.899496	0.902399	0.991247	0.943677	-0.702245	-0.669272	-0.671404	-0.6708	-0.666405	-0.669308	-0.758156	-0.710586
b1343	dbpA	b3068	mug	0.986411	0.972735	0.0104809	0.972735	0.959146	0.959517	0.959407	0.932029	0.930966	1.0052	0.966372	-0.962254	-0.948665	-0.949036	-0.948926	-0.921548	-0.920485	-0.994719	-0.955891
b3652	recG	b3068	mug	0.973705	0.972735	0.00031882	0.972735	0.94644	0.947157	0.946946	0.924684	0.924524	1.0026	0.960604	-0.972416	-0.946121	-0.946838	-0.946627	-0.924365	-0.924205	-1.00229	-0.960285
b2212	alkB	b3068	mug	1.00567	0.972735	0.259214	0.972735	0.978409	0.978254	0.978301	0.943163	0.940732	1.00884	0.976168	-0.713521	-0.719195	-0.71904	-0.719087	-0.683949	-0.681518	-0.749623	-0.716954
b3189	murA	b3068	mug	0.969584	0.972735	0.0114081	0.969584	0.942319	0.943148	0.942905	0.922302	0.922435	1.00173	0.958855	-0.958176	-0.930911	-0.93174	-0.931497	-0.910894	-0.911027	-0.990318	-0.947447
b3163	nlpI	b3068	mug	0.986968	0.972735	0.0109154	0.972735	0.959703	0.960059	0.959953	0.932351	0.931248	1.00531	0.966637	-0.96182	-0.948788	-0.949144	-0.949038	-0.921436	-0.920333	-0.994396	-0.955722
b2236	yfaE	b3068	mug	0.969391	0.972735	0.342028	0.969391	0.942126	0.942961	0.942717	0.922191	0.922337	1.00168	0.958775	-0.627363	-0.600098	-0.600933	-0.600689	-0.580163	-0.580309	-0.659657	-0.616747
b2676	nrdF	b3068	mug	0.998076	0.972735	0.0400057	0.972735	0.970811	0.970864	0.970848	0.938771	0.93688	1.00744	0.972156	-0.932729	-0.930805	-0.930858	-0.930842	-0.898765	-0.896874	-0.967438	-0.93215
b3182	dacB	b3068	mug	0.99006	0.972735	0.0131369	0.972735	0.962795	0.963066	0.962985	0.934138	0.932816	1.00592	0.968131	-0.959598	-0.949658	-0.949929	-0.949848	-0.921001	-0.919679	-0.992779	-0.954994
b1531	marA	b3068	mug	0.987267	0.972735	0.0286258	0.972735	0.960002	0.960349	0.960246	0.932523	0.931399	1.00537	0.96678	-0.944109	-0.931376	-0.931723	-0.93162	-0.903897	-0.902773	-0.976743	-0.938154
b0147	thpR	b3068	mug	0.968774	0.972735	0.0106454	0.968774	0.941509	0.942361	0.942112	0.921834	0.922024	1.00155	0.958518	-0.958129	-0.930864	-0.931716	-0.931467	-0.911189	-0.911379	-0.990907	-0.947873
b2963	mltC	b3068	mug	0.948226	0.972735	0.303974	0.948226	0.920961	0.922372	0.921966	0.909957	0.911606	0.996885	0.950757	-0.644252	-0.616987	-0.618398	-0.617992	-0.605983	-0.607632	-0.692911	-0.646783
b3377	yhfT	b3068	mug	0.983431	0.972735	0.290118	0.972735	0.956166	0.956618	0.956484	0.930306	0.929455	1.00461	0.964968	-0.682617	-0.666048	-0.6665	-0.666366	-0.640188	-0.639337	-0.714488	-0.67485
b4171	miaA	b3068	mug	0.979915	0.972735	0.00274479	0.972735	0.95265	0.953198	0.953036	0.928274	0.927673	1.00389	0.963352	-0.96999	-0.949905	-0.950453	-0.950291	-0.925529	-0.924928	-1.00115	-0.960607
b0374	yaiU	b3147	lpoA	1.0068	0.734928	0.31217	0.734928	0.741723	0.739922	0.740355	0.818375	0.82995	0.832429	0.795778	-0.422758	-0.429553	-0.427752	-0.428185	-0.506205	-0.51778	-0.520259	-0.483608
b3009	yghB	b3149	diaA	0.968356	1.19138	0	0.968356	1.15974	1.15368	1.15576	1.03692	1.02419	1.03677	1.01929	-0.968356	-1.15974	-1.15368	-1.15576	-1.03692	-1.02419	-1.03677	-1.01929
b0442	ybaV	b3155	yhbQ	0.966497	1.00704	0	0.966497	0.973537	0.973301	0.973372	0.938613	0.936933	1.01193	0.974478	-0.966497	-0.973537	-0.973301	-0.973372	-0.938613	-0.936933	-1.01193	-0.974478
b3549	tag	b3158	yhbU	0.949952	1.03142	0.371361	0.949952	0.981373	0.9798	0.980275	0.94191	0.93996	1.01564	0.9782	-0.578591	-0.610012	-0.608439	-0.608914	-0.570549	-0.568599	-0.644284	-0.606839
b3385	gph	b3158	yhbU	1.0073	1.03142	0.487806	1.0073	1.03872	1.03895	1.03887	0.975055	0.969032	1.02282	1.00426	-0.519489	-0.550914	-0.551144	-0.551064	-0.487249	-0.481226	-0.535018	-0.516454
b0890	ftsK	b3163	nlpI	1.06262	0.861488	0.416047	0.861488	0.924105	0.915432	0.917917	0.917397	0.917511	0.976824	0.942886	-0.445441	-0.508058	-0.499385	-0.50187	-0.50135	-0.501464	-0.560777	-0.526839
b4347	symE	b3163	nlpI	0.964148	0.861488	0	0.861488	0.825636	0.830602	0.829289	0.860481	0.867589	0.936819	0.884451	-0.861488	-0.825636	-0.830602	-0.829289	-0.860481	-0.867589	-0.936819	-0.884451
b0490	fetA	b3163	nlpI	0.979961	0.861488	0.18671	0.861488	0.841449	0.844225	0.843481	0.869621	0.875606	0.944305	0.890566	-0.674778	-0.654739	-0.657515	-0.656771	-0.682911	-0.688896	-0.757595	-0.703856
b0789	clsB	b3163	nlpI	0.952414	0.861488	0.399448	0.861488	0.813902	0.820493	0.818769	0.853699	0.86164	0.930991	0.880778	-0.46204	-0.414454	-0.421045	-0.419321	-0.454251	-0.462192	-0.531543	-0.48133
b0779	uvrB	b3179	rlmE	0.95374	0.877964	0.000627436	0.877964	0.831704	0.837349	0.835848	0.863156	0.870027	0.944872	0.893269	-0.877336	-0.831077	-0.836722	-0.835221	-0.862529	-0.8694	-0.944245	-0.892642
b0981	etk	b3179	rlmE	1.00651	0.877964	0.0984421	0.877964	0.884471	0.883677	0.883898	0.893656	0.896779	0.96676	0.916175	-0.779522	-0.786029	-0.785235	-0.785456	-0.795214	-0.798337	-0.868318	-0.817733
b3145	yraK	b3179	rlmE	0.947897	0.877964	0.00554374	0.877964	0.825861	0.83222	0.830537	0.859779	0.867065	0.942167	0.891596	-0.87242	-0.820317	-0.826676	-0.824993	-0.854235	-0.861521	-0.936623	-0.886052
b1336	abgT	b3179	rlmE	0.990837	0.877964	0.327914	0.877964	0.868801	0.869919	0.869612	0.884598	0.888834	0.960727	0.907919	-0.55005	-0.540887	-0.542005	-0.541698	-0.556684	-0.56092	-0.632813	-0.580005
b1983	yeeN	b3182	dacB	0.919046	1.00888	0.152214	0.919046	0.927929	0.92721	0.927418	0.912158	0.913739	1.00376	0.958927	-0.766832	-0.775715	-0.774996	-0.775204	-0.759944	-0.761525	-0.85155	-0.806713
b3463	ftsE	b3248	yhdE	0.962822	0.966513	0.00077725	0.962822	0.929335	0.93058	0.930219	0.915112	0.916093	0.997883	0.952771	-0.962044	-0.928558	-0.929803	-0.929442	-0.914335	-0.915316	-0.997106	-0.951994
b4347	symE	b3261	fis	0.964148	0.948572	0.131831	0.948572	0.91272	0.914563	0.914036	0.906415	0.908365	0.99073	0.943154	-0.816741	-0.780889	-0.782732	-0.782205	-0.774584	-0.776534	-0.858899	-0.811323
b4201	priB	b3263	yhdU	1.0262	0.919396	0.384997	0.919396	0.945598	0.943486	0.944105	0.926893	0.926164	0.994214	0.956663	-0.534398	-0.560601	-0.558489	-0.559108	-0.541896	-0.541167	-0.609217	-0.571666
b4469	ygiQ	b3263	yhdU	0.920237	0.919396	0	0.919396	0.839633	0.846062	0.844338	0.865645	0.872441	0.960106	0.91286	-0.919396	-0.839633	-0.846062	-0.844338	-0.865645	-0.872441	-0.960106	-0.91286
b1459	yncM	b3280	yrdB	0.96803	1.08482	0.00189672	0.96803	1.05285	1.05013	1.051	0.980523	0.974127	1.0275	1.00321	-0.966133	-1.05095	-1.04823	-1.0491	-0.978626	-0.97223	-1.0256	-1.00131
b0374	yaiU	b3280	yrdB	1.0068	1.08482	0	1.0068	1.09161	1.09219	1.092	1.00293	0.993781	1.03036	1.02156	-1.0068	-1.09161	-1.09219	-1.092	-1.00293	-0.993781	-1.03036	-1.02156
b3281	aroE	b3376	yhfS	0.937407	1.18717	0.269368	0.937407	1.12458	1.11286	1.11677	1.01681	1.00653	1.03548	1.00627	-0.668039	-0.855212	-0.843492	-0.847402	-0.747444	-0.73716	-0.766115	-0.736898
b0015	dnaJ	b3376	yhfS	0.989485	1.18717	0.341744	0.989485	1.17666	1.17469	1.17537	1.04691	1.03293	1.03718	1.02856	-0.647741	-0.834916	-0.832946	-0.833626	-0.705169	-0.691187	-0.69544	-0.686812
b4000	hupA	b3380	yhfW	0.916472	0.970189	0	0.916472	0.886661	0.889151	0.888455	0.89026	0.894316	0.987526	0.940389	-0.916472	-0.886661	-0.889151	-0.888455	-0.89026	-0.894316	-0.987526	-0.940389
b3549	tag	b3380	yhfW	0.949952	0.970189	0.0276254	0.949952	0.920141	0.921633	0.921203	0.909612	0.911289	0.996281	0.950009	-0.922326	-0.892516	-0.894008	-0.893578	-0.881987	-0.883664	-0.968656	-0.922384
b2395	pdeA	b3380	yhfW	0.943898	0.970189	0.00170739	0.943898	0.914087	0.915759	0.915281	0.906112	0.90822	0.994798	0.94798	-0.94219	-0.91238	-0.914052	-0.913574	-0.904405	-0.906513	-0.993091	-0.946273
b0548	ninE	b3380	yhfW	0.982621	0.970189	0	0.970189	0.95281	0.953328	0.953175	0.928495	0.927852	1.00358	0.963222	-0.970189	-0.95281	-0.953328	-0.953175	-0.928495	-0.927852	-1.00358	-0.963222
b0712	ybgK	b3381	yhfX	0.977519	1.15576	0.102339	0.977519	1.13328	1.12978	1.13096	1.02343	1.01216	1.03501	1.02077	-0.87518	-1.03094	-1.02744	-1.02862	-0.92109	-0.909818	-0.932667	-0.918435
b3380	yhfW	b3381	yhfX	0.979485	1.15576	0.017169	0.979485	1.13525	1.13205	1.13313	1.02456	1.01315	1.03509	1.02166	-0.962316	-1.11808	-1.11488	-1.11596	-1.0074	-0.995985	-1.01792	-1.00449
b4274	yjgW	b3381	yhfX	0.960187	1.15576	0.352889	0.960187	1.11595	1.10975	1.11181	1.01341	1.00337	1.03427	1.01319	-0.607297	-0.763061	-0.756861	-0.758921	-0.660522	-0.650481	-0.681383	-0.660301
b3381	yhfX	b3381	yhfX	0.980161	1.15576	0.243759	0.980161	1.13592	1.13283	1.13388	1.02496	1.0135	1.03511	1.02197	-0.736402	-0.892161	-0.889071	-0.890121	-0.781197	-0.769738	-0.791353	-0.778208
b0093	ftsQ	b3386	rpe	1.06472	0.649508	1.02499	0.649508	0.714229	0.691545	0.696719	0.806801	0.819321	0.768653	0.763571	0.375481	0.31076	0.333444	0.32827	0.218188	0.205668	0.256336	0.261418
b0095	ftsZ	b3386	rpe	1.1458	0.649508	1.03139	0.649508	0.795304	0.744204	0.756657	0.853663	0.860424	0.829979	0.863377	0.38188	0.236085	0.287185	0.274732	0.177726	0.170965	0.20141	0.168012
b0491	fetB	b3397	nudE	0.98448	1.11588	0	0.98448	1.10036	1.09856	1.09915	1.00641	0.99701	1.03216	1.01788	-0.98448	-1.10036	-1.09856	-1.09915	-1.00641	-0.99701	-1.03216	-1.01788
b4451	ryhB	b3448	yhhA	0.909768	0.988807	0	0.909768	0.898575	0.899585	0.8993	0.896206	0.899634	0.994021	0.947779	-0.909768	-0.898575	-0.899585	-0.8993	-0.896206	-0.899634	-0.994021	-0.947779
b1545	pinQ	b3465	rsmD	0.935733	1.01444	0	0.935733	0.950169	0.949241	0.949514	0.924732	0.924799	1.00876	0.966292	-0.935733	-0.950169	-0.949241	-0.949514	-0.924732	-0.924799	-1.00876	-0.966292
b4362	dnaT	b3584	yiaT	0.963017	1.02196	0	0.963017	0.984973	0.984161	0.984407	0.944469	0.942152	1.01525	0.979523	-0.963017	-0.984973	-0.984161	-0.984407	-0.944469	-0.942152	-1.01525	-0.979523
b0085	murE	b3652	recG	1.19361	0.739157	1.16958	0.739157	0.932767	0.882265	0.896407	0.928587	0.926642	0.948733	0.987525	0.430422	0.236811	0.287313	0.273171	0.240991	0.242936	0.220845	0.182053
b4451	ryhB	b3652	recG	0.909768	0.739157	0	0.739157	0.648924	0.672461	0.66726	0.764523	0.782739	0.7644	0.778063	-0.739157	-0.648924	-0.672461	-0.66726	-0.764523	-0.782739	-0.7644	-0.778063
b0779	uvrB	b3652	recG	0.95374	0.739157	0.2407	0.739157	0.692897	0.704963	0.702183	0.78994	0.805032	0.798007	0.779267	-0.498456	-0.452197	-0.464263	-0.461483	-0.54924	-0.564332	-0.557307	-0.538567
b2650	ypjC	b3706	mnmE	0.986936	0.945877	0	0.945877	0.932813	0.93352	0.933314	0.918165	0.918656	0.995422	0.951414	-0.945877	-0.932813	-0.93352	-0.933314	-0.918165	-0.918656	-0.995422	-0.951414
b0442	ybaV	b3743	asnC	0.966497	0.951159	0	0.951159	0.917656	0.919293	0.918823	0.909138	0.910767	0.992485	0.945585	-0.951159	-0.917656	-0.919293	-0.918823	-0.909138	-0.910767	-0.992485	-0.945585
b3281	aroE	b3778	rep	0.937407	0.89058	0	0.89058	0.827987	0.834836	0.833019	0.86037	0.867654	0.947001	0.897787	-0.89058	-0.827987	-0.834836	-0.833019	-0.86037	-0.867654	-0.947001	-0.897787
b0632	dacA	b3813	uvrD	0.927222	1.34034	1.38376	0.927222	1.26756	1.2428	1.25179	1.09172	1.07309	1.04048	0.98988	0.456537	0.116199	0.140959	0.131969	0.292041	0.310674	0.343284	0.393879
b4348	hsdS	b1432	ydcM	0.944124	1.37305	1.30916	0.944124	1.31717	1.29633	1.30413	1.11874	1.09697	1.04102	0.989676	0.36504	-0.00800819	0.0128361	0.00503163	0.190426	0.212196	0.268142	0.319489
b0760	modF	b3813	uvrD	0.883252	1.34034	1.37995	0.883252	1.22359	1.18386	1.19781	1.0663	1.05079	1.04001	0.974361	0.496701	0.156363	0.196093	0.182143	0.313651	0.32916	0.339945	0.405592
b1349	recT	b3813	uvrD	0.934381	1.34034	1.38129	0.934381	1.27472	1.25239	1.26055	1.09586	1.07671	1.04054	0.992569	0.446909	0.10657	0.1289	0.12074	0.285435	0.304576	0.340749	0.388721
b1545	pinQ	b3813	uvrD	0.935733	1.34034	1.45115	0.935733	1.27607	1.2542	1.2622	1.09664	1.0774	1.04055	0.993081	0.515414	0.175077	0.196947	0.188947	0.35451	0.373747	0.410594	0.458066
b4362	dnaT	b1432	ydcM	0.944264	1.37305	1.20054	0.944264	1.31731	1.29652	1.30431	1.1188186571.097038657	1.04102	0.989728	0.256281	-0.116768	-0.0959753	-0.103761	0.081726	0.103506	0.159521	0.210817
b1633	nth	b3813	uvrD	0.92722	1.34034	1.44877	0.92722	1.26756	1.24279	1.25179	1.09172	1.07308	1.04048	0.98988	0.521551	0.181211	0.205981	0.196981	0.357055	0.375687	0.408296	0.458891
b3145	yraK	b3813	uvrD	0.947897	1.34034	1.24125	0.947897	1.28824	1.27051	1.27705	1.10367	1.08357	1.04066	0.99775	0.293352	-0.04699	-0.0292573	-0.0357975	0.137582	0.157683	0.200593	0.2435
b1860	ruvB	b3813	uvrD	0.937562	1.34034	1.48343	0.937562	1.2779	1.25665	1.26443	1.09769	1.07833	1.04057	0.993776	0.545871	0.205533	0.226783	0.219003	0.385739	0.405106	0.442864	0.489657
b2699	recA	b3813	uvrD	0.925962	1.34034	1.45153	0.925962	1.2663	1.24111	1.25025	1.09099	1.07245	1.04046	0.989411	0.525564	0.185226	0.210416	0.201276	0.360537	0.37908	0.411063	0.462115
b0436	tig	b2890	lysS	0.949142	1.36618	1.22864	0.949142	1.31533	1.2967	1.30368	1.11802	1.0963	1.04098	0.993046	0.279503	-0.0866817	-0.0680583	-0.0750307	0.110627	0.132347	0.187663	0.235599
b1114	mfd	b3813	uvrD	0.943209	1.34034	1.1767	0.943209	1.28355	1.26422	1.27133	1.10096	1.08119	1.04062	0.995938	0.233487	-0.106855	-0.0875264	-0.0946307	0.075739	0.095507	0.136079	0.180759
b2819	recD	b3813	uvrD	0.938708	1.34034	1.40302	0.938708	1.27905	1.25819	1.26583	1.09836	1.07891	1.04058	0.994213	0.464313	0.123971	0.144831	0.137191	0.304665	0.324113	0.362442	0.408808
b3095	yqjA	b3813	uvrD	0.939631	1.34034	1.46667	0.939631	1.27997	1.25943	1.26696	1.09889	1.07938	1.04059	0.994566	0.527042	0.186703	0.207243	0.199713	0.367783	0.387297	0.426086	0.472107
b2823	ppdC	b2890	lysS	0.971364	1.36618	1.30251	0.971364	1.33755	1.32706	1.33105	1.13086	1.10756	1.04112	1.00164	0.331145	-0.0350398	-0.0245538	-0.0285418	0.171646	0.194944	0.261392	0.300864
b3068	mug	b3813	uvrD	0.988112	1.34034	1.20028	0.988112	1.32845	1.32441	1.32594	1.12691	1.10396	1.04096	1.01381	0.212166	-0.128176	-0.12413	-0.125665	0.073366	0.096323	0.159322	0.18647
b4206	ytfB	b3813	uvrD	0.964906	1.34034	1.24825	0.964906	1.30525	1.2933	1.29776	1.1135	1.09219	1.04079	1.00444	0.283349	-0.0569927	-0.0450486	-0.049508	0.134756	0.156065	0.207463	0.243813
b3191	mlaB	b3813	uvrD	0.928878	1.34034	1.33822	0.928878	1.26922	1.24501	1.25382	1.09267	1.07392	1.04049	0.990499	0.409346	0.0690039	0.0932139	0.0844039	0.24555	0.2643	0.297733	0.347725
b3384	trpS	b3813	uvrD	0.979253	1.34034	1.2145	0.979253	1.31959	1.31253	1.3152	1.12179	1.09946	1.0409	1.01021	0.235245	-0.105097	-0.0980361	-0.100699	0.092707	0.115034	0.173602	0.204292
b3262	yhdJ	b3813	uvrD	0.924584	1.34034	1.38871	0.924584	1.26493	1.23926	1.24856	1.09019	1.07175	1.04045	0.9889	0.464126	0.12378	0.14945	0.14015	0.298518	0.316962	0.34826	0.39981
b0190	yaeQ	b3813	uvrD	0.962066	1.34034	1.25121	0.962066	1.30241	1.2895	1.29431	1.11186	1.09075	1.04077	1.00331	0.289143	-0.0511989	-0.0382884	-0.0430988	0.139352	0.160459	0.210439	0.247896
b4000	hupA	b3813	uvrD	0.916472	1.34034	1.35035	0.916472	1.25681	1.22839	1.23863	1.0855	1.06763	1.04037	0.985922	0.433876	0.0935381	0.121958	0.111718	0.264844	0.282713	0.309977	0.364426
b4203	rplI	b3813	uvrD	0.917563	1.34034	1.22941	0.917563	1.2579	1.22985	1.23997	1.08613	1.06819	1.04038	0.986319	0.311846	-0.0284918	-0.000441799	-0.0105618	0.143274	0.16122	0.189026	0.243089
b4451	ryhB	b3813	uvrD	0.909768	1.34034	1.26742	0.909768	1.25011	1.2194	1.23041	1.08163	1.06424	1.0403	0.983504	0.357654	0.0173117	0.0480217	0.0370117	0.185794	0.203186	0.227118	0.283918
b1574	dicF	b3813	uvrD	0.969612	1.34034	1.26634	0.969612	1.30995	1.29961	1.30349	1.11622	1.09458	1.04083	1.00632	0.296732	-0.0436101	-0.0332678	-0.037142	0.150125	0.171768	0.225517	0.260022
b4469	ygiQ	b3813	uvrD	0.920237	1.34034	1.34608	0.920237	1.26058	1.23343	1.24324	1.08768	1.06954	1.04041	0.987297	0.425848	0.0855048	0.112655	0.102845	0.258405	0.276541	0.305676	0.358788
b3248	yhdE	b2890	lysS	0.941797	1.36618	1.30779	0.941797	1.30798	1.28667	1.29461	1.11377	1.09258	1.04093	0.990267	0.365989	-0.000195716	0.0211172	0.0131801	0.194013	0.215211	0.266852	0.317519
b3281	aroE	b3937	yiiX	0.937407	0.963047	0	0.937407	0.900454	0.902767	0.902112	0.898594	0.901585	0.990025	0.942168	-0.937407	-0.900454	-0.902767	-0.902112	-0.898594	-0.901585	-0.990025	-0.942168
b4426	mcaS	b4058	uvrA	0.975989	0.94974	0	0.94974	0.92573	0.926937	0.926588	0.913876	0.914915	0.994303	0.948712	-0.94974	-0.92573	-0.926937	-0.926588	-0.913876	-0.914915	-0.994303	-0.948712
b0374	yaiU	b4062	soxS	1.0068	0.893473	0	0.893473	0.900269	0.899545	0.899749	0.902003	0.904187	0.975987	0.927509	-0.893473	-0.900269	-0.899545	-0.899749	-0.902003	-0.904187	-0.975987	-0.927509
b3933	ftsN	b4062	soxS	0.948462	0.893473	0.202627	0.893473	0.841935	0.847425	0.84595	0.868285	0.874613	0.95394	0.902644	-0.690846	-0.639308	-0.644798	-0.643323	-0.665658	-0.671986	-0.751313	-0.700017
b4438	cyaR	b4170	mutL	0.976804	0.897641	0.2547	0.897641	0.874445	0.87682	0.876164	0.886866	0.890933	0.967904	0.915617	-0.642941	-0.619745	-0.62212	-0.621464	-0.632166	-0.636233	-0.713204	-0.660917
b4062	soxS	b4171	miaA	0.963168	0.840801	0.00116063	0.840801	0.803969	0.809833	0.808315	0.849003	0.857406	0.918497	0.868126	-0.83964	-0.802808	-0.808672	-0.807154	-0.847842	-0.856245	-0.917336	-0.866965
b3191	mlaB	b4171	miaA	0.928878	0.840801	0	0.840801	0.769679	0.781001	0.778159	0.829183	0.840021	0.898767	0.860239	-0.840801	-0.769679	-0.781001	-0.778159	-0.829183	-0.840021	-0.898767	-0.860239
b3066	dnaG	b4172	hfq	0.973921	0.782747	0.0963995	0.782747	0.756668	0.762334	0.760938	0.824597	0.835674	0.865538	0.823423	-0.686347	-0.660268	-0.665934	-0.664538	-0.728197	-0.739274	-0.769138	-0.727023
b2230	yfaA	b4172	hfq	0.988735	0.782747	0.388928	0.782747	0.771482	0.773929	0.773319	0.833159	0.843185	0.875458	0.829502	-0.393819	-0.382554	-0.385001	-0.384391	-0.444231	-0.454257	-0.48653	-0.440574
b1552	cspI	b4174	hflK	0.960031	0.979518	0.0441587	0.960031	0.939548	0.940367	0.940128	0.920358	0.920767	1.0021	0.958571	-0.915872	-0.895389	-0.896208	-0.895969	-0.876199	-0.876608	-0.957942	-0.914412
b4469	ygiQ	b4175	hflC	0.920237	1.08729	0	0.920237	1.00753	1.00057	1.00271	0.954204	0.951056	1.02346	0.985499	-0.920237	-1.00753	-1.00057	-1.00271	-0.954204	-0.951056	-1.02346	-0.985499
b0065	yabI	b4200	rpsF	0.991809	0.570805	0.9863	0.570805	0.562614	0.56613	0.565457	0.723144	0.745504	0.630579	0.636592	0.415495	0.423686	0.42017	0.420843	0.263156	0.240796	0.355721	0.349708			#REF!
b1756	ynjD	b4200	rpsF	0.974681	0.570805	0.993516	0.570805	0.545487	0.556353	0.554309	0.713244	0.736821	0.621682	0.630956	0.422711	0.448029	0.437163	0.439207	0.280272	0.256695	0.371834	0.36256
b0085	murE	b4200	rpsF	1.19361	0.570805	1.0883	0.570805	0.764416	0.681319	0.700233	0.839787	0.847814	0.766925	0.871404	0.517491	0.32388	0.406977	0.388063	0.248509	0.240482	0.321371	0.216892
b3067	rpoD	b4200	rpsF	1.00409	0.570805	1.05987	0.570805	0.574893	0.573138	0.573478	0.730241	0.751729	0.637264	0.642507	0.489064	0.484976	0.486731	0.486391	0.329628	0.30814	0.422605	0.417362
b2823	ppdC	b4200	rpsF	0.988011	0.570805	0.89629	0.570805	0.558817	0.563962	0.562982	0.720949	0.743579	0.628564	0.635079	0.325485	0.337473	0.332328	0.333308	0.175341	0.152711	0.267726	0.261211
b0876	ybjD	b4200	rpsF	0.984632	0.570805	1.05123	0.570805	0.555437	0.562033	0.56078	0.718995	0.741865	0.62679	0.633858	0.480422	0.49579	0.489194	0.490447	0.332232	0.309362	0.424437	0.417369
b0398	sbcD	b4200	rpsF	0.991938	0.570805	0.969558	0.570805	0.562743	0.566203	0.565542	0.723218	0.74557	0.630649	0.636646	0.398753	0.406815	0.403355	0.404016	0.24634	0.223988	0.338909	0.332912
b2068	alkA	b4200	rpsF	0.993667	0.570805	1.07588	0.570805	0.564472	0.56719	0.56667	0.724218	0.746446	0.631575	0.637387	0.50507	0.511403	0.508685	0.509205	0.351657	0.329429	0.4443	0.438488
b3638	yicR	b4200	rpsF	0.980995	0.570805	0.94268	0.570805	0.5518	0.559957	0.558413	0.716893	0.740022	0.624903	0.632678	0.371875	0.39088	0.382723	0.384267	0.225787	0.202658	0.317777	0.310002
b3248	yhdE	b4200	rpsF	0.992278	0.570805	1.04142	0.570805	0.563083	0.566398	0.565764	0.723415	0.745742	0.63083	0.63679	0.470619	0.478342	0.475027	0.475661	0.31801	0.295683	0.410595	0.404635
b1599	mdtI	b4200	rpsF	0.979325	0.570805	0.96551	0.570805	0.550131	0.559004	0.557328	0.715928	0.739175	0.624045	0.632182	0.394705	0.415379	0.406506	0.408182	0.249582	0.226335	0.341465	0.333328
b0472	recR	b4200	rpsF	1.00263	0.570805	0.92817	0.570805	0.573431	0.572304	0.572522	0.729396	0.750988	0.636455	0.641722	0.357365	0.354739	0.355866	0.355648	0.198774	0.177182	0.291715	0.286448
b2863	ygeQ	b4200	rpsF	0.979894	0.570805	0.969728	0.570805	0.550699	0.559328	0.557697	0.716257	0.739463	0.624337	0.632347	0.398923	0.419029	0.4104	0.412031	0.253471	0.230265	0.345391	0.337381
b3178	ftsH	b4200	rpsF	0.97977	0.570805	0.946455	0.570805	0.550575	0.559258	0.557617	0.716185	0.739401	0.624273	0.632311	0.375649	0.39588	0.387197	0.388838	0.23027	0.207054	0.322182	0.314144
b4044	dinF	b4200	rpsF	0.984683	0.570805	0.938331	0.570805	0.555488	0.562062	0.560814	0.719025	0.741891	0.626817	0.633876	0.367526	0.382843	0.376269	0.377517	0.219306	0.19644	0.311514	0.304455
b2698	recX	b4200	rpsF	0.985106	0.570805	0.95936	0.570805	0.555911	0.562304	0.561089	0.71927	0.742106	0.627038	0.634022	0.388555	0.403449	0.397056	0.398271	0.24009	0.217254	0.332322	0.325338
b3807	cyaY	b4200	rpsF	0.983664	0.570805	1.07445	0.570805	0.55447	0.561481	0.560151	0.718436	0.741375	0.626286	0.633531	0.503641	0.519976	0.512965	0.514295	0.35601	0.333071	0.44816	0.440915
b2945	endA	b4200	rpsF	0.97914	0.570805	1.03942	0.570805	0.549945	0.558898	0.557207	0.715821	0.739081	0.62395	0.632129	0.468612	0.489472	0.480519	0.48221	0.323596	0.300336	0.415467	0.407288
b1219	ychN	b4200	rpsF	0.983425	0.570805	0.992118	0.570805	0.55423	0.561344	0.559994	0.718298	0.741253	0.626162	0.633451	0.421312	0.437888	0.430774	0.432124	0.27382	0.250865	0.365956	0.358667
b0285	paoB	b4200	rpsF	0.997043	0.570805	1.03901	0.570805	0.567848	0.569117	0.568874	0.726169	0.748158	0.633398	0.638923	0.468203	0.471161	0.469892	0.470135	0.31284	0.290851	0.405611	0.400086
b4313	fimE	b4200	rpsF	0.989876	0.570805	0.938229	0.570805	0.560681	0.565027	0.564197	0.722027	0.744524	0.629551	0.635803	0.367423	0.377548	0.373202	0.374032	0.216202	0.193705	0.308678	0.302426
b4351	mrr	b4200	rpsF	1.00148	0.570805	0.942483	0.570805	0.572287	0.571651	0.571774	0.728735	0.750408	0.635824	0.641122	0.371677	0.370196	0.370832	0.370709	0.213748	0.192075	0.306659	0.301361
b1532	marB	b4200	rpsF	0.981567	0.570805	0.947569	0.570805	0.552373	0.560284	0.558786	0.717224	0.740312	0.625199	0.632854	0.376764	0.395196	0.387285	0.388783	0.230345	0.207257	0.32237	0.314715
b2001	yeeR	b4200	rpsF	0.978443	0.570805	0.961258	0.570805	0.549248	0.5585	0.556754	0.715418	0.738728	0.623593	0.631932	0.390453	0.41201	0.402758	0.404504	0.24584	0.22253	0.337665	0.329326
b3462	ftsX	b4200	rpsF	0.991166	0.570805	0.947376	0.570805	0.561971	0.565763	0.565038	0.722772	0.745178	0.630237	0.636325	0.376571	0.385405	0.381613	0.382338	0.224604	0.202198	0.317139	0.311051
b2627	abpB	b4200	rpsF	0.980763	0.570805	0.890272	0.570805	0.551568	0.559825	0.558262	0.716759	0.739904	0.624784	0.632607	0.319467	0.338704	0.330447	0.33201	0.173513	0.150368	0.265488	0.257665
b0213	yafS	b4200	rpsF	0.987242	0.570805	1.02602	0.570805	0.558047	0.563523	0.562481	0.720504	0.743189	0.628158	0.63479	0.455217	0.467976	0.4625	0.463542	0.305519	0.282834	0.397865	0.391233
b0245	ykfI	b4200	rpsF	0.989701	0.570805	0.930496	0.570805	0.560507	0.564927	0.564083	0.721926	0.744436	0.629458	0.635734	0.359691	0.369989	0.365569	0.366413	0.20857	0.18606	0.301038	0.294762
b3389	aroB	b4200	rpsF	0.997395	0.570805	0.931641	0.570805	0.5682	0.569318	0.569103	0.726373	0.748336	0.633589	0.63909	0.360836	0.363441	0.362323	0.362538	0.205268	0.183305	0.298052	0.292551
b0890	ftsK	b4200	rpsF	1.06262	0.570805	1.01634	0.570805	0.633422	0.606547	0.612033	0.764071	0.781402	0.672522	0.69087	0.44553	0.382913	0.409788	0.404302	0.252264	0.234933	0.343813	0.325465
b0502	ylbG	b4200	rpsF	0.979414	0.570805	0.979954	0.570805	0.550219	0.559055	0.557385	0.715979	0.73922	0.62409	0.632208	0.409149	0.429735	0.420899	0.422569	0.263975	0.240734	0.355864	0.347746
b3935	priA	b4200	rpsF	0.979395	0.570805	1.04918	0.570805	0.5502	0.559044	0.557373	0.715968	0.73921	0.624081	0.632202	0.478376	0.498981	0.490137	0.491808	0.333213	0.309971	0.4251	0.416979
b3046	yqiG	b4200	rpsF	0.983069	0.570805	0.893121	0.570805	0.553875	0.561141	0.559763	0.718092	0.741073	0.625977	0.633334	0.322315	0.339246	0.33198	0.333358	0.175029	0.152048	0.267144	0.259787
b3047	yqiH	b4200	rpsF	0.986536	0.570805	0.933999	0.570805	0.557341	0.56312	0.562021	0.720096	0.742831	0.627787	0.634531	0.363194	0.376658	0.370879	0.371978	0.213903	0.191168	0.306212	0.299468
b0060	polB	b4200	rpsF	0.996417	0.570805	0.980176	0.570805	0.567222	0.56876	0.568465	0.725807	0.74784	0.633058	0.63863	0.40937	0.412954	0.411416	0.411711	0.254369	0.232336	0.347118	0.341546
b3378	yhfU	b4200	rpsF	0.986017	0.570805	0.997069	0.570805	0.556822	0.562824	0.561682	0.719796	0.742568	0.627515	0.634344	0.426263	0.440247	0.434245	0.435387	0.277273	0.254501	0.369554	0.362725
b1730	ydjO	b4200	rpsF	0.991745	0.570805	1.06709	0.570805	0.56255	0.566093	0.565416	0.723107	0.745472	0.630545	0.636565	0.496285	0.50454	0.500997	0.501674	0.343983	0.321618	0.436545	0.430525
b0876	ybjD	b4200	rpsF	0.984632	0.570805	0.924882	0.570805	0.555437	0.562033	0.56078	0.718995	0.741865	0.62679	0.633858	0.354077	0.369445	0.362849	0.364102	0.205887	0.183017	0.298092	0.291024
b4416	rybA	b4200	rpsF	0.981152	0.570805	1.00101	0.570805	0.551958	0.560047	0.558516	0.716984	0.740101	0.624985	0.632726	0.430205	0.449052	0.440963	0.442494	0.284026	0.260909	0.376025	0.368284
b0086	murF	b4200	rpsF	1.02363	0.570805	1.12958	0.570805	0.594431	0.584291	0.586289	0.741535	0.761635	0.648422	0.655073	0.558772	0.535146	0.545286	0.543288	0.388042	0.367942	0.481155	0.474504
b0252	yafZ	b4200	rpsF	1.00775	0.570805	1.05912	0.570805	0.578555	0.575229	0.575874	0.732358	0.753586	0.639307	0.64457	0.488312	0.480562	0.483888	0.483243	0.326759	0.305531	0.41981	0.414547
b3381	yhfX	b4200	rpsF	0.980161	0.570805	0.950054	0.570805	0.550967	0.559481	0.557871	0.716412	0.739599	0.624474	0.632427	0.379248	0.399087	0.390573	0.392183	0.233642	0.210455	0.32558	0.317627
b4142	groS	b4200	rpsF	0.999013	0.570805	0.947493	0.570805	0.569818	0.570242	0.57016	0.727308	0.749156	0.634471	0.639874	0.376688	0.377675	0.377251	0.377333	0.220185	0.198337	0.313022	0.307619
b2916	argP	b4200	rpsF	0.981396	0.570805	1.00146	0.570805	0.552201	0.560186	0.558674	0.717125	0.740225	0.625111	0.632801	0.430653	0.449257	0.441272	0.442784	0.284333	0.261233	0.376347	0.368657
b3743	asnC	b4200	rpsF	0.993282	0.570805	0.915871	0.570805	0.564088	0.566971	0.566419	0.723996	0.746251	0.631368	0.63722	0.345066	0.351783	0.3489	0.349452	0.191875	0.16962	0.284503	0.278651
b2912	fau	b4200	rpsF	0.98187	0.570805	0.927791	0.570805	0.552676	0.560457	0.558983	0.717399	0.740465	0.625356	0.632949	0.356986	0.375115	0.367334	0.368808	0.210392	0.187326	0.302435	0.294842
b2962	yggX	b4200	rpsF	0.981309	0.570805	0.9054	0.570805	0.552114	0.560136	0.558618	0.717075	0.740181	0.625066	0.632774	0.334594	0.353286	0.345264	0.346782	0.188325	0.165219	0.280334	0.272626
b2271	yfbL	b4200	rpsF	0.98423	0.570805	0.921483	0.570805	0.555035	0.561804	0.560519	0.718763	0.741662	0.626581	0.633721	0.350678	0.366448	0.359679	0.360964	0.20272	0.179821	0.294902	0.287762
b3807	cyaY	b4200	rpsF	0.983664	0.570805	1.00003	0.570805	0.55447	0.561481	0.560151	0.718436	0.741375	0.626286	0.633531	0.429224	0.445559	0.438548	0.439878	0.281593	0.258654	0.373743	0.366498
b0233	yafO	b4200	rpsF	0.996024	0.570805	1.01526	0.570805	0.566829	0.568536	0.568208	0.72558	0.747641	0.632846	0.638447	0.444457	0.448434	0.446727	0.447055	0.289683	0.267622	0.382417	0.376816
b0548	ninE	b4200	rpsF	0.982621	0.570805	0.945374	0.570805	0.553427	0.560885	0.559472	0.717833	0.740846	0.625745	0.633189	0.374568	0.391947	0.384489	0.385902	0.227541	0.204528	0.319629	0.312185
b2827	thyA	b4200	rpsF	0.988639	0.570805	0.913173	0.570805	0.559444	0.56432	0.563391	0.721312	0.743897	0.628895	0.635318	0.342368	0.353729	0.348853	0.349782	0.191861	0.169276	0.284278	0.277855
b2467	nudK	b4200	rpsF	0.977258	0.570805	0.999106	0.570805	0.548063	0.557824	0.555983	0.714733	0.738127	0.622988	0.631608	0.428301	0.451043	0.441282	0.443123	0.284373	0.260979	0.376118	0.367498
b0560	nohB	b4200	rpsF	0.984996	0.570805	0.932122	0.570805	0.555801	0.562241	0.561017	0.719206	0.74205	0.62698	0.633984	0.361316	0.376321	0.369881	0.371105	0.212916	0.190072	0.305142	0.298138
b1060	bssS	b4200	rpsF	0.980768	0.570805	1.02526	0.570805	0.551573	0.559827	0.558266	0.716762	0.739907	0.624787	0.632609	0.454454	0.473686	0.465432	0.466993	0.308497	0.285352	0.400472	0.39265
b0467	priC	b4200	rpsF	0.981154	0.570805	1.00029	0.570805	0.55196	0.560048	0.558517	0.716985	0.740102	0.624986	0.632727	0.429482	0.448328	0.44024	0.441771	0.283303	0.260186	0.375302	0.367561
b3638	yicR	b4200	rpsF	0.980995	0.570805	0.890641	0.570805	0.5518	0.559957	0.558413	0.716893	0.740022	0.624903	0.632678	0.319836	0.338841	0.330684	0.332228	0.173748	0.150619	0.265738	0.257963
b1061	dinI	b4200	rpsF	0.976655	0.570805	0.919702	0.570805	0.54746	0.55748	0.555591	0.714385	0.737821	0.622681	0.63145	0.348897	0.372242	0.362222	0.364111	0.205317	0.181881	0.297021	0.288252
b4044	dinF	b4200	rpsF	0.984683	0.570805	0.926567	0.570805	0.555488	0.562062	0.560814	0.719025	0.741891	0.626817	0.633876	0.355762	0.371079	0.364505	0.365753	0.207542	0.184676	0.29975	0.292691
b4465	yggP	b4200	rpsF	0.985195	0.570805	0.93209	0.570805	0.556001	0.562355	0.561147	0.719321	0.742151	0.627085	0.634054	0.361285	0.376089	0.369735	0.370943	0.212769	0.189939	0.305005	0.298036
b2159	nfo	b4200	rpsF	0.987379	0.570805	1.00768	0.570805	0.558184	0.563601	0.56257	0.720583	0.743258	0.62823	0.634841	0.436873	0.449495	0.444078	0.445109	0.287096	0.264421	0.379449	0.372838
b4348	hsdS	b4200	rpsF	0.990111	0.570805	0.918305	0.570805	0.560916	0.56516	0.56435	0.722162	0.744643	0.629675	0.635897	0.347499	0.357389	0.353145	0.353955	0.196143	0.173662	0.28863	0.282408
b2666	yqaE	b4200	rpsF	0.991579	0.570805	0.914965	0.570805	0.562384	0.565998	0.565307	0.723011	0.745387	0.630457	0.636496	0.34416	0.352581	0.348967	0.349658	0.191954	0.169578	0.284508	0.278469
b0229	lfhA	b4200	rpsF	0.980701	0.570805	0.893148	0.570805	0.551506	0.559789	0.558222	0.716723	0.739873	0.624752	0.632588	0.322343	0.341642	0.333359	0.334926	0.176425	0.153275	0.268396	0.26056
b0375	yaiV	b4200	rpsF	0.986227	0.570805	1.04687	0.570805	0.557032	0.562943	0.561819	0.719917	0.742674	0.627625	0.634419	0.47606	0.489833	0.483922	0.485046	0.326948	0.304191	0.41924	0.412446
b2467	nudK	b4200	rpsF	0.977258	0.570805	0.951178	0.570805	0.548063	0.557824	0.555983	0.714733	0.738127	0.622988	0.631608	0.380373	0.403115	0.393354	0.395195	0.236445	0.213051	0.32819	0.31957
b0491	fetB	b4200	rpsF	0.98448	0.570805	0.98913	0.570805	0.555285	0.561946	0.560681	0.718908	0.741788	0.626711	0.633806	0.418324	0.433845	0.427184	0.428449	0.270222	0.247342	0.362419	0.355324
b0093	ftsQ	b4200	rpsF	1.06472	0.570805	1.04826	0.570805	0.635526	0.607748	0.613429	0.765287	0.782469	0.673888	0.693168	0.47746	0.412739	0.440517	0.434836	0.282978	0.265796	0.374377	0.355097
b2831	mutH	b4200	rpsF	0.976492	0.570805	0.960553	0.570805	0.547297	0.557387	0.555486	0.714291	0.737739	0.622599	0.631407	0.389748	0.413256	0.403166	0.405067	0.246262	0.222814	0.337954	0.329146
b0090	murG	b4200	rpsF	1.0594	0.570805	0.990783	0.570805	0.630202	0.604709	0.609898	0.76221	0.77977	0.670443	0.68742	0.419978	0.360581	0.386074	0.380885	0.228573	0.211013	0.32034	0.303363
b0231	dinB	b4200	rpsF	0.9977	0.570805	0.9709	0.570805	0.568505	0.569492	0.569303	0.726549	0.748491	0.633755	0.639236	0.400094	0.402395	0.401408	0.401597	0.244351	0.222409	0.337145	0.331664
b0226	dinJ	b4200	rpsF	0.993863	0.570805	1.08384	0.570805	0.564668	0.567302	0.566798	0.724331	0.746546	0.63168	0.637473	0.513036	0.519173	0.516539	0.517043	0.35951	0.337295	0.452161	0.446368
b2650	ypjC	b4200	rpsF	0.986936	0.570805	1.04295	0.570805	0.557741	0.563348	0.562281	0.720327	0.743033	0.627997	0.634677	0.472146	0.48521	0.479603	0.48067	0.322624	0.299918	0.414954	0.408274
b4331	kptA	b4200	rpsF	0.991258	0.570805	0.979489	0.570805	0.562063	0.565815	0.565098	0.722825	0.745225	0.630285	0.636363	0.408684	0.417426	0.413674	0.414391	0.256664	0.234264	0.349204	0.343126
b3380	yhfW	b4200	rpsF	0.979485	0.570805	0.920295	0.570805	0.55029	0.559095	0.557431	0.71602	0.739256	0.624127	0.632228	0.34949	0.370005	0.3612	0.362864	0.204275	0.181039	0.296168	0.288067
b1545	pinQ	b4209	ytfE	0.935733	1.1067	0	0.935733	1.04244	1.03558	1.03774	0.9734	0.968001	1.02783	0.995455	-0.935733	-1.04244	-1.03558	-1.03774	-0.9734	-0.968001	-1.02783	-0.995455
b4201	priB	b4209	ytfE	1.0262	1.1067	0.335851	1.0262	1.13291	1.1357	1.13476	1.02569	1.01387	1.03354	1.03679	-0.690351	-0.797059	-0.799849	-0.798909	-0.689841	-0.678017	-0.697689	-0.700938
b4451	ryhB	b4313	fimE	0.909768	0.787704	0	0.787704	0.697472	0.716628	0.712158	0.79013	0.805471	0.825749	0.817858	-0.787704	-0.697472	-0.716628	-0.712158	-0.79013	-0.805471	-0.825749	-0.817858
b2827	thyA	b4348	hsdS	0.988639	0.830828	0	0.830828	0.819467	0.821389	0.820885	0.858465	0.865649	0.923272	0.870242	-0.830828	-0.819467	-0.821389	-0.820885	-0.858465	-0.865649	-0.923272	-0.870242
b4362	dnaT	b4349	hsdM	0.963017	1.01108	0.283315	0.963017	0.974095	0.973685	0.973809	0.938731	0.937059	1.01246	0.974852	-0.679701	-0.69078	-0.69037	-0.690494	-0.655416	-0.653744	-0.729142	-0.691537
b4000	hupA	b4389	radA	0.916472	1.08589	0	0.916472	1.00236	0.995183	0.997379	0.951286	0.948489	1.02282	0.98391	-0.916472	-1.00236	-0.995183	-0.997379	-0.951286	-0.948489	-1.02282	-0.98391
b0245	ykfI	b4504	ykfH	0.989701	0.820135	0	0.820135	0.809836	0.811688	0.811208	0.853439	0.861181	0.914122	0.86194	-0.820135	-0.809836	-0.811688	-0.811208	-0.853439	-0.861181	-0.914122	-0.86194
b3262	yhdJ	b4526	ydaE	0.924584	0.891252	0	0.891252	0.815836	0.824038	0.821885	0.853313	0.861467	0.941619	0.895632	-0.891252	-0.815836	-0.824038	-0.821885	-0.853313	-0.861467	-0.941619	-0.895632
b1552	cspI	b4526	ydaE	0.960031	0.891252	0	0.891252	0.851283	0.85563	0.854453	0.873801	0.879438	0.957225	0.904734	-0.891252	-0.851283	-0.85563	-0.854453	-0.873801	-0.879438	-0.957225	-0.904734

## Sheet: Negative_test_data
Table S2. List of training (336; Sheet 1), and test (400 interacting, Sheet 2; 400 non-interacting, Sheet 3) gene pairs and their predicted GI (ε) scores based on observed and expected mutant fitness.
Bnum1	Gene1	Bnum2	Gene2	Observed actual fitness			Expected mutant fitness								GI score (ε; Observed-Expected)
				Wx	Wy	Wxy	Min	Add	Multi	Log	LR	SVR	NN	GP	εMin	εAdd	εMulti	εLog	εLR	εSVR	εNN	εGP
b0089	ftsW	b1913	uvrC	0.945021	1.0292	0.940172	0.945021	0.974218	0.972613	0.973095	0.937886	0.936419	1.01436	0.975507	-0.00484928	-0.034046	-0.032441	-0.032923	0.002286	0.003753	-0.074193	-0.035335
b3179	rlmE	b0876	ybjD	1.02061	1.02303	1.11437	1.02061	1.04363	1.04411	1.04396	0.978321	0.971851	1.02275	1.00815	0.0937667	0.070742	0.070262	0.070412	0.136051	0.142521	0.091621	0.106223
b4357	lgoR	b3043	ygiL	0.990784	0.967027	0.932827	0.967027	0.957811	0.958115	0.958024	0.931545	0.93051	1.00417	0.965391	-0.0342001	-0.024984	-0.025288	-0.025197	0.001282	0.002317	-0.071343	-0.032564
b1055	yceA	b0014	dnaK	0.982025	1.0606	1.08253	0.982025	1.04262	1.04153	1.04188	0.975837	0.969882	1.02517	1.00227	0.100508	0.039913	0.041003	0.040653	0.106696	0.112651	0.057358	0.080265
b0960	yccS	b1349	recT	0.945688	1.01926	0.953544	0.945688	0.964948	0.963902	0.964214	0.933031	0.932105	1.01185	0.97173	0.00785579	-0.011404	-0.010358	-0.01067	0.020513	0.021439	-0.058311	-0.018186
b0880	cspD	b3397	nudE	0.967539	1.11588	1.01156	0.967539	1.08341	1.07965	1.08088	0.996622	0.988422	1.03116	1.01024	0.0440198	-0.071851	-0.068091	-0.069321	0.014937	0.023137	-0.019598	0.001316
b2912	fau	b3380	yhfW	0.98187	0.970189	0.920982	0.970189	0.952059	0.9526	0.95244	0.928061	0.927471	1.00342	0.962875	-0.0492068	-0.031077	-0.031618	-0.031458	-0.007079	-0.006489	-0.082441	-0.041893
b0714	nei	b1750	ydjX	0.980436	0.976179	0.968401	0.976179	0.956615	0.957081	0.956943	0.930392	0.929549	1.00515	0.965418	-0.00777821	0.011786	0.01132	0.011458	0.038009	0.038852	-0.036753	0.002983
b1348	ralR	b1865	nudB	0.986178	0.95092	0.998492	0.95092	0.937098	0.937776	0.937579	0.920387	0.920633	0.997265	0.954033	0.0475723	0.061394	0.060716	0.060913	0.078105	0.077859	0.001227	0.044459
b3390	aroK	b1134	nudJ	0.983533	0.964852	1.00767	0.964852	0.948386	0.948964	0.948794	0.926207	0.925816	1.0019	0.960724	0.0428158	0.059282	0.058704	0.058874	0.081461	0.081852	0.005767	0.046944
b0091	murC	b1428	ydcK	0.956838	0.98868	0.95323	0.956838	0.945519	0.946008	0.945864	0.923346	0.923439	1.0046	0.961958	-0.0036085	0.007711	0.007222	0.007366	0.029884	0.029791	-0.051372	-0.008728
b2234	nrdA	b0383	phoA	0.994757	0.962372	0.967183	0.962372	0.95713	0.957327	0.957269	0.931387	0.930345	1.00339	0.964791	0.00481064	0.010053	0.009856	0.009914	0.035796	0.036838	-0.036211	0.002392
b1510	ydeK	b2929	yggD	0.983142	1.0164	1.01799	0.983142	0.999537	0.999261	0.999346	0.953168	0.949752	1.0168	0.985988	0.0348512	0.018456	0.018732	0.018647	0.064825	0.068241	0.001191	0.032005
b3047	yqiH	b3681	glvG	0.986536	1.14077	1.08832	0.986536	1.12731	1.12541	1.12605	1.02074	1.00971	1.03433	1.02303	0.10178	-0.038994	-0.037094	-0.037734	0.06758	0.078605	0.053984	0.06529
b2945	endA	b4306	yjhP	0.97914	0.976501	1.04536	0.976501	0.955641	0.956131	0.955986	0.929812	0.929043	1.005	0.965	0.0688601	0.08972	0.08923	0.089375	0.115549	0.116318	0.040358	0.080361
b3023	ygiV	b0790	ybhP	0.985028	1.13984	1.07411	0.985028	1.12487	1.12277	1.12348	1.01937	1.00851	1.0342	1.02219	0.0890838	-0.050758	-0.048658	-0.049368	0.054741	0.065604	0.039916	0.051917
b1372	stfR	b4389	radA	0.981336	1.08589	0.984949	0.981336	1.06722	1.06562	1.06613	0.988778	0.981374	1.02868	1.00946	0.00361314	-0.082271	-0.080671	-0.081181	-0.003829	0.003575	-0.043733	-0.024513
b1195	ymgE	b1913	uvrC	0.983062	1.0292	0.982277	0.983062	1.01226	1.01176	1.01192	0.959874	0.955705	1.0196	0.991297	-0.000785325	-0.029983	-0.029483	-0.029643	0.022403	0.026572	-0.037319	-0.00902
b2912	fau	b4058	uvrA	0.98187	0.94974	0.934799	0.94974	0.931611	0.932522	0.932257	0.917275	0.917897	0.995758	0.951335	-0.0149415	0.003188	0.002277	0.002542	0.017524	0.016902	-0.060959	-0.016536
b3385	gph	b0876	ybjD	1.0073	1.02303	1.00066	1.0073	1.03032	1.03049	1.03044	0.970628	0.965103	1.02127	1.00087	-0.00663428	-0.029659	-0.029829	-0.029779	0.030033	0.035558	-0.020607	-0.000213
b0912	ihfB	b1730	ydjO	0.957642	0.913495	0.873495	0.913495	0.871138	0.874802	0.873791	0.884153	0.888642	0.970535	0.918998	-0.0400003	0.002357	-0.001307	-0.000296	-0.010658	-0.015147	-0.09704	-0.045503
b1863	ruvC	b2830	rppH	0.963871	0.863956	0.926228	0.863956	0.827826	0.832742	0.83144	0.861623	0.868604	0.938674	0.886217	0.0622723	0.098402	0.093486	0.094788	0.064605	0.057624	-0.012446	0.040011
b2356	yfdM	b3263	yhdU	0.983867	0.919396	0.915616	0.919396	0.903263	0.904563	0.904195	0.902423	0.904701	0.982461	0.933423	-0.00377983	0.012353	0.011053	0.011421	0.013193	0.010915	-0.066845	-0.017807
b3780	rhlB	b1921	fliZ	0.975475	0.949608	0.915181	0.949608	0.925083	0.926319	0.925962	0.913509	0.914592	0.994118	0.948411	-0.0344273	-0.009902	-0.011138	-0.010781	0.001672	0.000589	-0.078937	-0.03323
b3163	nlpI	b3908	sodA	0.986968	1.01015	1.00132	0.986968	0.997118	0.996985	0.997026	0.952085	0.948767	1.01587	0.985045	0.0143476	0.004198	0.004331	0.00429	0.049231	0.052549	-0.014556	0.016271
b0502	ylbG	b1749	xthA	0.979414	0.907314	0.920156	0.907314	0.886728	0.888636	0.888103	0.893477	0.896786	0.974533	0.923383	0.0128419	0.033428	0.03152	0.032053	0.026679	0.02337	-0.054377	-0.003227
b1335	ogt	b1656	sodB	0.98586	0.915236	0.973686	0.915236	0.901097	0.902295	0.901956	0.901382	0.903764	0.980937	0.931615	0.0584495	0.072589	0.071391	0.07173	0.072304	0.069922	-0.007251	0.042071
b4167	yjeF	b4044	dinF	0.980027	0.980654	1.04978	0.980027	0.960681	0.961067	0.960952	0.932515	0.931437	1.00653	0.967568	0.0697505	0.089096	0.08871	0.088825	0.117262	0.11834	0.043251	0.082209
b1115	ycfT	b1758	ynjF	0.992952	1.10552	1.04278	0.992952	1.09848	1.09773	1.09798	1.00585	0.996458	1.03165	1.01972	0.0498312	-0.055697	-0.054947	-0.055197	0.036932	0.046325	0.011133	0.023059
b1159	mcrA	b2011	sbcB	0.978025	0.882419	0.899647	0.882419	0.860443	0.863027	0.862322	0.879542	0.884424	0.958563	0.905321	0.0172283	0.039204	0.03662	0.037325	0.020105	0.015223	-0.058916	-0.005674
b3149	diaA	b1763	topB	0.983781	0.92281	1.01315	0.92281	0.906591	0.907843	0.907487	0.904175	0.906256	0.98415	0.935601	0.0903389	0.106558	0.105306	0.105662	0.108974	0.106893	0.028999	0.077548
b3647	ligB	b0436	tig	0.996684	1.04835	1.01938	0.996684	1.04503	1.04487	1.04492	0.977848	0.971577	1.02462	1.00515	0.0226997	-0.025646	-0.025486	-0.025536	0.041536	0.047807	-0.005238	0.014237
b4308	yjhR	b1749	xthA	0.999232	0.907314	0.921954	0.907314	0.906546	0.906617	0.906597	0.904932	0.906833	0.98099	0.932965	0.0146399	0.015408	0.015337	0.015357	0.017022	0.015121	-0.059036	-0.011011
b0229	lfhA	b0442	ybaV	0.980701	0.993511	0.992438	0.980701	0.974211	0.974337	0.974299	0.939686	0.937799	1.01053	0.974329	0.0117371	0.018227	0.018101	0.018139	0.052752	0.054639	-0.018092	0.018109
b3702	dnaA	b4389	radA	0.985928	1.08589	1.01932	0.985928	1.07181	1.07061	1.071	0.991432	0.983702	1.02902	1.0116	0.0333935	-0.052488	-0.051288	-0.051678	0.02789	0.03562	-0.009702	0.007718
b1863	ruvC	b4389	radA	0.963871	1.08589	0.979214	0.963871	1.04976	1.04665	1.04764	0.978683	0.972519	1.0273	1.00171	0.0153433	-0.070546	-0.067436	-0.068426	0.000531	0.006695	-0.048086	-0.022491
b1346	ydaQ	b1195	ymgE	0.981029	0.954794	0.902324	0.954794	0.935823	0.936681	0.936431	0.919454	0.919836	0.997574	0.953891	-0.0524704	-0.033499	-0.034357	-0.034107	-0.01713	-0.017512	-0.09525	-0.051567
b3638	yicR	b1428	ydcK	0.980995	0.98868	1.05885	0.980995	0.969675	0.96989	0.969826	0.937309	0.935686	1.00917	0.972085	0.0778502	0.08917	0.088955	0.089019	0.121536	0.123159	0.04967	0.08676
b4504	ykfH	b3442	yhhZ	0.991296	1.10827	1.05046	0.991296	1.09957	1.09863	1.09894	1.00634	0.996905	1.03182	1.01953	0.0591609	-0.049113	-0.048173	-0.048483	0.044114	0.053552	0.018635	0.030931
b3649	rpoZ	b3261	fis	0.935482	0.948572	0.91673	0.935482	0.884054	0.887372	0.886446	0.889846	0.893831	0.982532	0.933627	-0.0187519	0.032676	0.029358	0.030284	0.026884	0.022899	-0.065802	-0.016897
b3743	asnC	b2666	yqaE	0.993282	0.882508	0.956014	0.882508	0.87579	0.87658	0.876361	0.888408	0.892202	0.964628	0.912454	0.0735061	0.080224	0.079434	0.079653	0.067606	0.063812	-0.008614	0.04356
b3933	ftsN	b3248	yhdE	0.948462	0.966513	0.945576	0.948462	0.914975	0.916701	0.916206	0.906812	0.908813	0.994409	0.947538	-0.0028855	0.030601	0.028875	0.02937	0.038764	0.036763	-0.048833	-0.001962
b3681	glvG	b2893	dsbC	0.98171	1.17403	1.07385	0.98171	1.15574	1.15255	1.15364	1.03548	1.02283	1.03628	1.02429	0.0921386	-0.081891	-0.078701	-0.079791	0.038364	0.051015	0.037573	0.049557
b0233	yafO	b0245	ykfI	0.996024	0.964006	0.946596	0.964006	0.96003	0.960173	0.960131	0.932981	0.931752	1.00421	0.966345	-0.0174102	-0.013434	-0.013577	-0.013535	0.013615	0.014844	-0.057616	-0.019749
b0472	recR	b0226	dinJ	1.00263	0.950806	0.975681	0.950806	0.953432	0.953303	0.953341	0.929834	0.928918	1.00097	0.962267	0.0248754	0.022249	0.022378	0.02234	0.045847	0.046763	-0.025286	0.013414
b2894	xerD	b2345	yfdF	1.00921	0.891642	0.943636	0.891642	0.900855	0.899857	0.900139	0.902434	0.904555	0.975775	0.927589	0.0519944	0.042781	0.043779	0.043497	0.041202	0.039081	-0.032139	0.016047
b1599	mdtI	b0517	allD	0.979325	0.930069	0.954766	0.930069	0.909395	0.91084	0.910428	0.905428	0.907396	0.986386	0.938215	0.0246968	0.045371	0.043926	0.044338	0.049338	0.04737	-0.03162	0.016551
b1758	ynjF	b0228	rayT	0.985481	0.904247	0.959755	0.904247	0.889728	0.891118	0.890729	0.895366	0.898426	0.974857	0.92404	0.0555081	0.070027	0.068637	0.069026	0.064389	0.061329	-0.015102	0.035715
b4326	iraD	b2928	yggC	0.984812	1.10827	1.06451	0.984812	1.09308	1.09143	1.09197	1.00259	0.993615	1.03144	1.01646	0.079696	-0.028572	-0.026922	-0.027462	0.061916	0.070893	0.033071	0.048044
b3068	mug	b1413	hrpA	0.988112	0.853858	0.913919	0.853858	0.84197	0.843707	0.843242	0.870308	0.876166	0.942188	0.888351	0.0600611	0.071949	0.070212	0.070677	0.043611	0.037753	-0.028269	0.025568
b0179	lpxD	b3778	rep	0.973308	0.89058	0.963075	0.89058	0.863888	0.866809	0.866009	0.881121	0.885855	0.962106	0.909212	0.0724949	0.099187	0.096266	0.097066	0.081954	0.07722	0.000969	0.053863
b3534	bcsQ	b1332	ynaJ	0.988027	1.10875	1.01231	0.988027	1.09678	1.09548	1.09591	1.00471	0.995473	1.03168	1.01808	0.0242833	-0.08447	-0.08317	-0.0836	0.007603	0.016837	-0.019367	-0.005766
b2824	ygdB	b3908	sodA	0.988003	1.01015	0.953995	0.988003	0.998152	0.99803	0.998067	0.952683	0.949291	1.01602	0.985541	-0.0340078	-0.044157	-0.044035	-0.044072	0.001312	0.004704	-0.062025	-0.031546
b2831	mutH	b0419	yajO	0.976492	0.907268	0.917732	0.907268	0.88376	0.88594	0.885332	0.891763	0.895283	0.973506	0.922088	0.0104644	0.033972	0.031792	0.0324	0.025969	0.022449	-0.055774	-0.004356
b0681	chiP	b1458	yncI	0.970921	1.05184	0.995734	0.970921	1.02276	1.02126	1.02173	0.964801	0.960153	1.02257	0.994302	0.0248125	-0.027026	-0.025526	-0.025996	0.030933	0.035581	-0.026837	0.001432
b2124	yehS	b3281	aroE	0.971378	0.827383	0.901742	0.827383	0.798761	0.803701	0.80243	0.846671	0.855285	0.910591	0.860206	0.0743589	0.102981	0.098041	0.099312	0.055071	0.046457	-0.008849	0.041536
b0398	sbcD	b1195	ymgE	0.991938	0.954794	1.04012	0.954794	0.946732	0.947097	0.94699	0.92576	0.925367	1.00007	0.959076	0.0853246	0.093387	0.093022	0.093129	0.114359	0.114752	0.040045	0.081043
b0689	ybfP	b1758	ynjF	0.98937	1.10552	1.03212	0.98937	1.09489	1.09377	1.09414	1.00378	0.994642	1.03144	1.01801	0.0427522	-0.062768	-0.061648	-0.062018	0.028342	0.03748	0.000685	0.014109
b1763	topB	b0779	uvrB	0.950757	1.15713	1.04645	0.950757	1.10789	1.10015	1.10271	1.00868	0.99923	1.03395	1.0094	0.0956876	-0.061445	-0.053705	-0.056265	0.037763	0.047215	0.012498	0.03705
b2001	yeeR	b0925	ldtD	0.978443	1.16333	1.08608	0.978443	1.14178	1.13825	1.13945	1.02796	1.01617	1.03553	1.02195	0.10764	-0.055697	-0.052167	-0.053367	0.058126	0.069912	0.05055	0.064131
b3149	diaA	b1134	nudJ	0.983781	0.964852	0.958577	0.964852	0.948633	0.949203	0.949035	0.92635	0.925941	1.00195	0.960839	-0.00627517	0.009944	0.009374	0.009542	0.032227	0.032636	-0.043377	-0.002262
b0875	aqpZ	b4389	radA	0.99024	1.08589	1.09112	0.99024	1.07612	1.07529	1.07556	0.993924	0.985888	1.02934	1.01365	0.100876	0.014996	0.015826	0.015556	0.097192	0.105228	0.061778	0.077463
b1115	ycfT	b1349	recT	0.992952	1.01926	0.937452	0.992952	1.01221	1.01208	1.01212	0.960349	0.956066	1.01875	0.991936	-0.0554998	-0.074758	-0.074628	-0.074668	-0.022897	-0.018614	-0.081301	-0.054484
b3638	yicR	b0702	ybfB	0.980995	0.995351	0.985341	0.980995	0.976346	0.976434	0.976408	0.940827	0.938809	1.0111	0.975357	0.0043462	0.008995	0.008907	0.008933	0.044514	0.046532	-0.025759	0.009984
b0095	ftsZ	b0542	renD	1.1458	0.992156	1.07948	0.992156	1.13795	1.13681	1.1372	1.0344	1.02086	1.02929	1.07757	0.0873263	-0.058468	-0.057328	-0.057718	0.045084	0.058618	0.05019	0.001916
b3017	ftsP	b4233	mpl	0.977717	1.14735	1.07536	0.977717	1.12506	1.12178	1.12288	1.01911	1.00832	1.03443	1.01987	0.0976404	-0.049703	-0.046423	-0.047523	0.056251	0.067039	0.040931	0.055486
b2170	setB	b4349	hsdM	0.991896	1.01108	1.05025	0.991896	1.00297	1.00288	1.00291	0.955424	0.9517	1.01679	0.987852	0.0583509	0.047277	0.047367	0.047337	0.094823	0.098547	0.033459	0.062395
b4416	rybA	b2675	nrdE	0.981152	0.998593	1.082	0.981152	0.979745	0.979772	0.979764	0.942628	0.940407	1.01202	0.976981	0.100848	0.102255	0.102228	0.102236	0.139372	0.141593	0.069977	0.105019
b1365	ynaK	b1983	yeeN	0.988486	0.960314	1.02019	0.960314	0.9488	0.949257	0.949122	0.926676	0.926202	1.00134	0.960536	0.0598813	0.071395	0.070938	0.071073	0.093519	0.093993	0.018857	0.059659
b4378	yjjV	b3043	ygiL	0.989324	0.967027	1.00057	0.967027	0.956351	0.956703	0.956599	0.930701	0.92977	1.00387	0.964677	0.0335389	0.044215	0.043863	0.043967	0.069865	0.070796	-0.003306	0.035889
b1034	ycdX	b1065	mdtH	0.97966	0.995046	0.95755	0.97966	0.974706	0.974807	0.974776	0.939895	0.93799	1.01079	0.974598	-0.0221098	-0.017156	-0.017257	-0.017226	0.017655	0.01956	-0.053238	-0.017048
b4388	serB	b1568	ydfX	0.979059	1.02476	0.96185	0.979059	1.00382	1.0033	1.00346	0.955221	0.951599	1.01814	0.987641	-0.0172085	-0.04197	-0.04145	-0.04161	0.006629	0.010251	-0.056287	-0.025791
b1630	rsxD	b1350	recE	0.974636	0.885036	0.958419	0.885036	0.859672	0.862588	0.861793	0.878964	0.883932	0.958957	0.905797	0.0733832	0.098747	0.095831	0.096626	0.079455	0.074487	-0.000538	0.052622
b0231	dinB	b3023	ygiV	0.9977	0.966425	0.968393	0.966425	0.964125	0.964202	0.964179	0.935225	0.933734	1.00535	0.96854	0.00196804	0.004268	0.004191	0.004214	0.033168	0.034659	-0.03696	-0.000147
b1184	umuC	b3263	yhdU	0.978842	0.919396	0.969816	0.919396	0.898238	0.899944	0.899462	0.899519	0.902153	0.98091	0.931161	0.0504202	0.071578	0.069872	0.070354	0.070297	0.067663	-0.011094	0.038655
b2068	alkA	b3807	cyaY	0.993667	0.955601	0.918235	0.955601	0.949268	0.949549	0.949466	0.927185	0.926622	1.00075	0.960403	-0.0373662	-0.031033	-0.031314	-0.031231	-0.00895	-0.008387	-0.082519	-0.042168
b4313	fimE	b3584	yiaT	0.989876	1.02196	1.09205	0.989876	1.01183	1.01161	1.01168	0.959994	0.95577	1.01893	0.991568	0.102173	0.080219	0.080439	0.080369	0.132055	0.136279	0.073114	0.100481
b3996	nudC	b1065	mdtH	0.962521	0.995046	0.958061	0.962521	0.957567	0.957753	0.957698	0.929988	0.929301	1.00775	0.967264	-0.00446047	0.000494	0.000308	0.000363	0.028073	0.02876	-0.049685	-0.009203
b1460	ydcC	b0245	ykfI	0.982487	0.964006	1.03016	0.964006	0.946493	0.947124	0.946939	0.925156	0.924889	1.00137	0.95977	0.0661508	0.083664	0.083033	0.083218	0.105001	0.105268	0.028786	0.070387
b3046	yqiG	b3389	aroB	0.983069	0.890793	0.983128	0.890793	0.873863	0.875711	0.875201	0.886875	0.890903	0.965989	0.913548	0.092335	0.109265	0.107417	0.107927	0.096253	0.092225	0.017139	0.06958
b1921	fliZ	b3266	acrF	0.983815	0.893145	0.930198	0.893145	0.87696	0.87869	0.878211	0.888547	0.892383	0.967726	0.915552	0.0370526	0.053238	0.051508	0.051987	0.041651	0.037815	-0.037528	0.014646
b3702	dnaA	b0839	dacC	0.985928	0.942571	1.00984	0.942571	0.928499	0.929307	0.929073	0.915839	0.916597	0.993797	0.948952	0.0672714	0.081343	0.080535	0.080769	0.094003	0.093245	0.016045	0.06089
b0467	priC	b2356	yfdM	0.981154	1.06627	1.05931	0.981154	1.04743	1.04618	1.04658	0.978329	0.972099	1.02597	1.00368	0.0781547	0.011879	0.013129	0.012729	0.08098	0.08721	0.033341	0.055625
b2699	recA	b0226	dinJ	0.925962	0.950806	0.935425	0.925962	0.876768	0.88041	0.879401	0.885522	0.890051	0.980741	0.932399	0.00946253	0.058657	0.055015	0.056024	0.049903	0.045374	-0.045316	0.003026
b3638	yicR	b0438	clpX	0.980995	0.912864	1.01368	0.912864	0.893859	0.895515	0.895049	0.897318	0.900186	0.97813	0.92781	0.100819	0.119824	0.118168	0.118634	0.116365	0.113497	0.035553	0.085873
b1335	ogt	b2159	nfo	0.98586	0.96164	1.00699	0.96164	0.947501	0.948043	0.947884	0.925858	0.925492	1.00125	0.960026	0.0453507	0.05949	0.058948	0.059107	0.081133	0.081499	0.005743	0.046965
b0924	mukB	b1750	ydjX	0.994128	0.976179	0.99259	0.976179	0.970307	0.970447	0.970405	0.938305	0.936491	1.00778	0.971977	0.0164108	0.022283	0.022143	0.022185	0.054285	0.056099	-0.015187	0.020613
b1562	hokD	b0267	yagA	0.997546	0.879907	0.901136	0.879907	0.877453	0.877748	0.877667	0.889501	0.893146	0.964601	0.912734	0.0212288	0.023683	0.023388	0.023469	0.011635	0.00799	-0.063465	-0.011598
b0183	rnhB	b0148	hrpB	0.997626	0.919554	0.926955	0.919554	0.91718	0.917371	0.917316	0.910459	0.91175	0.986609	0.940275	0.00740134	0.009775	0.009584	0.009639	0.016496	0.015205	-0.059654	-0.01332
b1134	nudJ	b1114	mfd	0.988976	0.876457	0.911965	0.876457	0.865433	0.866795	0.866422	0.882728	0.887185	0.958975	0.905908	0.0355083	0.046532	0.04517	0.045543	0.029237	0.02478	-0.04701	0.006057
b1059	solA	b1569	dicC	0.967288	1.00995	1.00735	0.967288	0.977241	0.976915	0.977013	0.940606	0.938697	1.01284	0.976118	0.0400647	0.030112	0.030438	0.03034	0.066747	0.068656	-0.005488	0.031235
b3701	dnaN	b0760	modF	0.977777	0.951069	0.943321	0.951069	0.928846	0.929934	0.929619	0.91561	0.916444	0.995297	0.950273	-0.00774836	0.014475	0.013387	0.013702	0.027711	0.026877	-0.051976	-0.006952
b3378	yhfU	b1731	cedA	0.986017	0.996293	0.995019	0.986017	0.98231	0.982362	0.982346	0.944227	0.941797	1.01219	0.978158	0.00900224	0.012709	0.012657	0.012673	0.050792	0.053222	-0.017172	0.016861
b0924	mukB	b2930	yggF	0.994128	0.987718	0.959569	0.987718	0.981846	0.981918	0.981896	0.944392	0.941893	1.01117	0.977909	-0.0281491	-0.022277	-0.022349	-0.022327	0.015177	0.017676	-0.051601	-0.01834
b3865	yihA	b1916	sdiA	0.956731	0.905014	0.984044	0.905014	0.861745	0.865855	0.864731	0.879153	0.884209	0.964991	0.913062	0.0790304	0.122299	0.118189	0.119313	0.104891	0.099835	0.019053	0.070982
b4349	hsdM	b1372	stfR	1.00214	0.893036	0.966464	0.893036	0.895173	0.894944	0.895008	0.899079	0.90162	0.974168	0.924626	0.0734278	0.071291	0.07152	0.071456	0.067385	0.064844	-0.007704	0.041838
b4503	yafF	b3780	rhlB	0.997806	0.883539	0.969316	0.883539	0.881345	0.881601	0.88153	0.891567	0.894978	0.96698	0.915518	0.0857769	0.087971	0.087715	0.087786	0.077749	0.074338	0.002336	0.053798
b2580	ung	b1865	nudB	0.991904	0.95092	1.01429	0.95092	0.942824	0.943221	0.943105	0.923697	0.923536	0.998602	0.956809	0.0633673	0.071463	0.071066	0.071182	0.09059	0.090751	0.015685	0.057478
b2002	yeeS	b3280	yrdB	0.987206	1.08482	1.01437	0.987206	1.07202	1.07094	1.07129	0.991607	0.983849	1.02899	1.01192	0.0271605	-0.057654	-0.056574	-0.056924	0.022759	0.030517	-0.014621	0.002445
b4509	ylcG	b4056	yjbQ	0.976895	0.962598	0.95168	0.962598	0.939492	0.940357	0.940104	0.921181	0.921394	0.999616	0.956462	-0.0109177	0.012188	0.011323	0.011576	0.030499	0.030286	-0.047936	-0.004782
b1963	yedR	b3360	pabA	0.991343	1.09707	1.07175	0.991343	1.08841	1.08757	1.08785	1.00046	0.991684	1.03068	1.01701	0.0804108	-0.016656	-0.015816	-0.016096	0.071293	0.08007	0.041073	0.054743
b3443	yrhA	b0213	yafS	0.986804	0.933783	0.999454	0.933783	0.920587	0.921461	0.92121	0.91171	0.912926	0.990196	0.943978	0.0656707	0.078867	0.077993	0.078244	0.087744	0.086528	0.009258	0.055476
b2159	nfo	b0548	ninE	0.987379	1.03451	1.00123	0.987379	1.02189	1.02145	1.02159	0.965171	0.960381	1.02118	0.995442	0.013853	-0.020658	-0.020218	-0.020358	0.036061	0.040851	-0.019945	0.00579
b0231	dinB	b2230	yfaA	0.9977	1.05401	0.959357	0.9977	1.05171	1.05159	1.05163	0.981425	0.974746	1.02561	1.00763	-0.038343	-0.092353	-0.092233	-0.092273	-0.022068	-0.015389	-0.066256	-0.04827
b0393	rdgC	b3150	yraP	0.988747	1.00862	1.04667	0.988747	0.997364	0.997267	0.997297	0.952305	0.948951	1.01576	0.985212	0.0579218	0.049305	0.049402	0.049372	0.094364	0.097718	0.030909	0.061457
b0262	afuC	b1759	nudG	0.978728	0.890938	0.957582	0.890938	0.869666	0.871986	0.871347	0.884442	0.88877	0.964434	0.911732	0.0666444	0.087916	0.085596	0.086235	0.07314	0.068812	-0.006852	0.04585
b3043	ygiL	b1442	ydcU	0.966964	0.95849	0.964872	0.95849	0.925454	0.926825	0.926429	0.913274	0.914436	0.995678	0.949966	0.00638247	0.039418	0.038047	0.038443	0.051598	0.050436	-0.030806	0.014906
b3387	dam	b1763	topB	0.96252	0.92281	0.95312	0.92281	0.88533	0.888223	0.887416	0.891886	0.895477	0.977511	0.926766	0.0303099	0.06779	0.064897	0.065704	0.061234	0.057643	-0.024391	0.026354
b0252	yafZ	b1808	yoaA	1.00775	1.02759	0.938606	1.00775	1.03533	1.03555	1.03548	0.973294	0.967467	1.02218	1.00297	-0.0691433	-0.096724	-0.096944	-0.096874	-0.034688	-0.028861	-0.083571	-0.064368
b2235	nrdB	b1183	umuD	0.967198	0.933695	0.942765	0.933695	0.900894	0.903069	0.902453	0.900331	0.902945	0.984612	0.935398	0.00906969	0.041871	0.039696	0.040312	0.042434	0.03982	-0.041847	0.007367
b2961	mutY	b1808	yoaA	0.978816	1.02759	1.01614	0.978816	1.0064	1.00582	1.006	0.95657	0.952798	1.01872	0.988686	0.0373239	0.00974	0.01032	0.01014	0.05957	0.063342	-0.002579	0.027454
b3163	nlpI	b1808	yoaA	0.986968	1.02759	1.06821	0.986968	1.01455	1.01419	1.01431	0.961282	0.956931	1.01975	0.992491	0.0812396	0.053658	0.054018	0.053898	0.106926	0.111277	0.04846	0.075717
b0065	yabI	b3014	yqhH	0.991809	1.12751	1.07562	0.991809	1.11932	1.11828	1.11863	1.01679	1.00618	1.03355	1.02345	0.0838152	-0.043696	-0.042656	-0.043006	0.058835	0.069449	0.04207	0.052175
b1372	stfR	b2068	alkA	0.981336	0.922532	0.913728	0.922532	0.903868	0.905314	0.904904	0.902615	0.904886	0.983279	0.934307	-0.00880409	0.00986	0.008414	0.008824	0.011113	0.008842	-0.069551	-0.020579
b0640	holA	b2627	abpB	0.981744	1.01126	1.01743	0.981744	0.993004	0.992798	0.992861	0.949652	0.946638	1.01538	0.983083	0.0356822	0.024422	0.024628	0.024565	0.067774	0.070788	0.002043	0.034343
b3387	dam	b2756	casE	0.96252	1.1019	1.01244	0.96252	1.06442	1.0606	1.06183	0.986349	0.979332	1.02926	1.0051	0.0499167	-0.051983	-0.048163	-0.049393	0.026088	0.033105	-0.016826	0.007339
b1184	umuC	b2159	nfo	0.978842	0.96164	1.04867	0.96164	0.940483	0.941294	0.941057	0.921802	0.921934	0.999695	0.956793	0.0870297	0.108187	0.107376	0.107613	0.126868	0.126736	0.048975	0.091877
b1510	ydeK	b1344	ttcA	0.983142	0.996866	1.08036	0.983142	0.980008	0.980061	0.980045	0.942867	0.940607	1.01188	0.977079	0.0972222	0.100356	0.100303	0.100319	0.137497	0.139757	0.068487	0.103285
b3182	dacB	b3388	damX	0.99006	1.17148	1.08822	0.99006	1.16154	1.15983	1.16042	1.03897	1.02587	1.03641	1.02793	0.0981571	-0.073323	-0.071613	-0.072203	0.049249	0.062343	0.051806	0.06029
b3383	yhfZ	b3150	yraP	1.04872	1.00862	0.974301	1.00862	1.05734	1.05776	1.05763	0.986973	0.979359	1.02319	1.01889	-0.0343159	-0.083039	-0.083459	-0.083329	-0.012672	-0.005058	-0.048887	-0.044585
b0689	ybfP	b0702	ybfB	0.98937	0.995351	1.00712	0.98937	0.984721	0.98477	0.984755	0.945668	0.943055	1.01248	0.979316	0.0177522	0.022401	0.022352	0.022367	0.061454	0.064067	-0.005358	0.027806
b0962	helD	b3465	rsmD	0.977122	1.01444	1.05724	0.977122	0.991558	0.991228	0.991329	0.948655	0.945782	1.01548	0.982375	0.0801208	0.065685	0.066015	0.065914	0.108588	0.111461	0.041762	0.074868
b0502	ylbG	b1159	mcrA	0.979414	0.93235	0.900017	0.93235	0.911764	0.913157	0.912759	0.906682	0.908508	0.987495	0.939685	-0.0323331	-0.011747	-0.01314	-0.012742	-0.006665	-0.008491	-0.087478	-0.039668
b0948	rlmL	b2011	sbcB	0.993741	0.882419	0.933837	0.882419	0.87616	0.876896	0.876693	0.888627	0.892393	0.964746	0.912619	0.0514183	0.057677	0.056941	0.057144	0.04521	0.041444	-0.030909	0.021218
b1836	yebV	b1134	nudJ	0.989398	0.964852	0.975369	0.964852	0.95425	0.954623	0.954512	0.929597	0.928789	1.00314	0.963514	0.0105168	0.021119	0.020746	0.020857	0.045772	0.04658	-0.02777	0.011855
b2124	yehS	b0839	dacC	0.971378	0.942571	0.995914	0.942571	0.913948	0.915592	0.915122	0.907428	0.90922	0.989984	0.942498	0.0533434	0.081966	0.080322	0.080792	0.088486	0.086694	0.00593	0.053416
b1921	fliZ	b3281	aroE	0.983815	0.827383	0.894611	0.827383	0.811198	0.813992	0.813265	0.85386	0.861591	0.917558	0.865228	0.0672279	0.083413	0.080619	0.081346	0.040751	0.03302	-0.022947	0.029383
b0634	mrdB	b1568	ydfX	0.99211	1.02476	1.09077	0.99211	1.01687	1.01668	1.01674	0.962764	0.958215	1.0198	0.993826	0.0986615	0.073901	0.074091	0.074031	0.128007	0.132556	0.07097	0.096945
b0634	mrdB	b3380	yhfW	0.99211	0.970189	1.0363	0.970189	0.962298	0.962534	0.962463	0.933979	0.932662	1.00549	0.967768	0.0661082	0.073999	0.073763	0.073834	0.102318	0.103635	0.03081	0.068529
b3386	rpe	b3448	yhhA	0.98226	0.988807	1.03591	0.98226	0.971068	0.971266	0.971207	0.938107	0.936387	1.00944	0.972731	0.0536507	0.064843	0.064645	0.064704	0.097804	0.099524	0.026474	0.06318
b3360	pabA	b2756	casE	0.975583	1.1019	0.995192	0.975583	1.07748	1.07499	1.0758	0.993899	0.985955	1.03017	1.01082	0.0196094	-0.082288	-0.079798	-0.080608	0.001293	0.009237	-0.034982	-0.015625
b3534	bcsQ	b0383	phoA	0.988027	0.962372	1.0215	0.962372	0.950399	0.95085	0.950717	0.927496	0.926933	1.00198	0.961471	0.0591306	0.071104	0.070653	0.070786	0.094007	0.09457	0.019525	0.060032
b3780	rhlB	b3034	nudF	0.975475	1.00717	0.991348	0.975475	0.982644	0.982468	0.982521	0.94387	0.941545	1.0134	0.9784	0.0158732	0.008704	0.00888	0.008827	0.047478	0.049803	-0.022054	0.012948
b3191	mlaB	b1759	nudG	0.928878	0.890938	0.856487	0.890938	0.819815	0.827572	0.825529	0.855628	0.863497	0.943377	0.896212	-0.0344506	0.036672	0.028915	0.030958	0.000859	-0.00701	-0.08689	-0.039725
b0880	cspD	b1763	topB	0.967539	0.92281	0.924516	0.92281	0.890349	0.892855	0.892153	0.894787	0.898021	0.979135	0.928676	0.00170588	0.034167	0.031661	0.032363	0.029729	0.026495	-0.054619	-0.00416
b3807	cyaY	b1569	dicC	0.983664	1.00995	1.03854	0.983664	0.993617	0.993455	0.993504	0.950072	0.947	1.01534	0.983393	0.0548735	0.044921	0.045083	0.045034	0.088466	0.091538	0.023193	0.055145
b4346	mcrB	b0702	ybfB	0.977574	0.995351	0.992873	0.977574	0.972925	0.973029	0.972998	0.93885	0.937075	1.01052	0.973803	0.0152992	0.019948	0.019844	0.019875	0.054023	0.055798	-0.017646	0.01907
b1059	solA	b2467	nudK	0.967288	0.961918	1.02777	0.961918	0.929207	0.930452	0.930091	0.91527	0.916206	0.997132	0.952018	0.0658558	0.098567	0.097322	0.097683	0.112504	0.111568	0.030642	0.075756
b4044	dinF	b1764	selD	0.984683	0.942195	0.989468	0.942195	0.926878	0.927764	0.927508	0.914921	0.91579	0.993321	0.94814	0.0472728	0.06259	0.061704	0.06196	0.074547	0.073678	-0.003853	0.041328
b2580	ung	b0262	afuC	0.991904	1.15036	1.05787	0.991904	1.14227	1.14105	1.14146	1.0289	1.01692	1.03522	1.02677	0.0659609	-0.084405	-0.083185	-0.083595	0.028969	0.040943	0.022644	0.031094
b1963	yedR	b2755	cas1	0.991343	1.04067	1.02725	0.991343	1.03201	1.03166	1.03177	0.970713	0.965276	1.02277	0.999711	0.0359078	-0.004759	-0.004409	-0.004519	0.056538	0.061975	0.004485	0.02754
b2892	recJ	b0438	clpX	0.986632	0.912864	0.900635	0.912864	0.899496	0.900661	0.900332	0.900576	0.903044	0.979937	0.930402	-0.0122289	0.001139	-2.6e-05	0.000303	5.9e-05	-0.002409	-0.079302	-0.029767
b3537	bcsF	b0702	ybfB	1.00298	0.995351	1.0619	0.995351	0.998333	0.998319	0.998324	0.953536	0.949957	1.0146	0.986208	0.0665439	0.063562	0.063576	0.063571	0.108359	0.111938	0.047294	0.075687
b1271	yciK	b1176	minC	0.989207	0.971055	1.01256	0.971055	0.960261	0.960574	0.960481	0.932758	0.931596	1.0052	0.966812	0.0415062	0.0523	0.051987	0.05208	0.079803	0.080965	0.007362	0.045749
b0422	xseB	b2271	yfbL	0.993677	0.890149	0.933397	0.890149	0.883826	0.884521	0.884327	0.892667	0.89598	0.969504	0.918156	0.0432478	0.049571	0.048876	0.04907	0.04073	0.037417	-0.036107	0.015241
b1861	ruvA	b3150	yraP	1.00664	1.00862	1.09453	1.00664	1.01525	1.01531	1.01529	0.962645	0.95802	1.01823	0.994311	0.0878938	0.079279	0.079219	0.079239	0.131884	0.136509	0.076303	0.100218
b3807	cyaY	b0245	ykfI	0.983664	0.964006	1	0.964006	0.947671	0.948259	0.948086	0.925837	0.925486	1.00163	0.960316	0.0359938	0.052329	0.051741	0.051914	0.074163	0.074514	-0.001626	0.039684
b3378	yhfU	b3448	yhhA	0.986017	0.988807	1.04223	0.986017	0.974824	0.974981	0.974934	0.940278	0.938291	1.01009	0.974494	0.0562162	0.067409	0.067252	0.067299	0.101955	0.103942	0.032138	0.067739
b1183	umuD	b3145	yraK	0.984164	1.11038	1.00166	0.984164	1.09455	1.0928	1.09337	1.00333	0.994278	1.03161	1.01661	0.0174932	-0.092893	-0.091143	-0.091713	-0.001677	0.007379	-0.029952	-0.014954
b0188	tilS	b3361	fic	0.992998	1.02248	1.07292	0.992998	1.01548	1.01532	1.01537	0.962076	0.957599	1.01944	0.993318	0.0799227	0.057441	0.057601	0.057551	0.110845	0.115322	0.053481	0.079603
b1134	nudJ	b0014	dnaK	0.988976	1.0606	1.09619	0.988976	1.04957	1.04891	1.04912	0.979856	0.973406	1.02582	1.00555	0.107216	0.046622	0.047282	0.047072	0.116336	0.122786	0.070373	0.090641
b3162	deaD	b3280	yrdB	0.986649	1.08482	1.05018	0.986649	1.07147	1.07033	1.0707	0.991285	0.983567	1.02895	1.01166	0.06353	-0.021291	-0.020151	-0.020521	0.058894	0.066612	0.021233	0.038521
b1179	ycgL	b1365	ynaK	0.97854	1.00881	1.06471	0.97854	0.987353	0.987164	0.987222	0.946509	0.943868	1.0143	0.980519	0.0861699	0.077357	0.077546	0.077488	0.118201	0.120842	0.050413	0.084191
b0624	crcB	b1195	ymgE	1.00317	0.954794	1.01043	0.954794	0.957963	0.95782	0.957862	0.932252	0.931061	1.00251	0.96487	0.0556326	0.052464	0.052607	0.052565	0.078175	0.079366	0.007914	0.045557
b2699	recA	b2159	nfo	0.925962	0.96164	1.01039	0.925962	0.887603	0.890443	0.889648	0.891237	0.895124	0.986169	0.93827	0.0844325	0.122792	0.119952	0.120747	0.119158	0.115271	0.024226	0.072125
b3484	yhhI	b0702	ybfB	0.987212	0.995351	1.01405	0.987212	0.982563	0.982622	0.982604	0.944421	0.941961	1.01213	0.978274	0.0268363	0.031485	0.031426	0.031444	0.069627	0.072087	0.001918	0.035774
b3162	deaD	b2159	nfo	0.986649	0.96164	1.03611	0.96164	0.948289	0.948801	0.948651	0.926314	0.925891	1.00142	0.960401	0.0744657	0.087817	0.087305	0.087455	0.109792	0.110215	0.034687	0.075705
b2345	yfdF	b3068	mug	0.97351	0.972735	0.902761	0.972735	0.946245	0.946968	0.946755	0.924572	0.924425	1.00256	0.96052	-0.0699741	-0.043484	-0.044207	-0.043994	-0.021811	-0.021664	-0.099802	-0.057759
b3780	rhlB	b0542	renD	0.975475	0.992156	1.02439	0.975475	0.967631	0.967823	0.967765	0.935951	0.934515	1.00922	0.971316	0.0489132	0.056757	0.056565	0.056623	0.088437	0.089873	0.015164	0.053072
b3183	obgE	b3908	sodA	0.986429	1.01015	1.0703	0.986429	0.996578	0.99644	0.996482	0.951774	0.948493	1.01579	0.984788	0.0838741	0.073725	0.073863	0.073821	0.118529	0.12181	0.054509	0.085515
b2831	mutH	b2675	nrdE	0.976492	0.998593	1.00951	0.976492	0.975085	0.975118	0.975108	0.939934	0.938044	1.01125	0.97487	0.033017	0.034424	0.034391	0.034401	0.069575	0.071465	-0.001742	0.034639
b3148	yraN	b1428	ydcK	0.986101	0.98868	1.04913	0.986101	0.974781	0.974939	0.974891	0.94026	0.938275	1.01007	0.97447	0.0630303	0.07435	0.074192	0.07424	0.108871	0.110856	0.039058	0.074661
b4349	hsdM	b0397	sbcC	1.00214	1.05826	1.04707	1.00214	1.06039	1.06052	1.06048	0.986227	0.978982	1.02664	1.01129	0.0449314	-0.013322	-0.013452	-0.013412	0.060841	0.068086	0.020427	0.035778
b1349	recT	b3155	yhbQ	0.934381	1.00704	0.917573	0.934381	0.94142	0.940958	0.941094	0.920049	0.92065	1.0062	0.962681	-0.0168077	-0.023847	-0.023385	-0.023521	-0.002476	-0.003077	-0.088631	-0.045108
b0245	ykfI	b4372	holD	0.989701	1.15403	1.09135	0.989701	1.14374	1.14215	1.14269	1.02956	1.01753	1.03537	1.02616	0.101647	-0.052392	-0.050802	-0.051342	0.061788	0.073823	0.055976	0.065187
b3048	yqiI	b0396	araJ	0.99745	0.974933	1.01021	0.974933	0.972383	0.972447	0.972427	0.939568	0.937591	1.00801	0.973005	0.0352761	0.037826	0.037762	0.037782	0.070641	0.072618	0.002202	0.037204
b4167	yjeF	b3908	sodA	0.980027	1.01015	0.974812	0.980027	0.990176	0.989973	0.990035	0.948073	0.945247	1.01486	0.981796	-0.00521451	-0.015364	-0.015161	-0.015223	0.026739	0.029565	-0.040044	-0.006984
b1445	ortT	b2900	yqfB	0.966871	1.05329	0.988403	0.966871	1.02016	1.0184	1.01895	0.963226	0.95878	1.02239	0.993052	0.0215324	-0.031757	-0.029997	-0.030547	0.025177	0.029623	-0.03399	-0.004649
b0438	clpX	b3584	yiaT	0.944899	1.02196	1.01801	0.944899	0.966855	0.965646	0.966007	0.933997	0.932967	1.01246	0.972559	0.0731092	0.051153	0.052362	0.052001	0.084011	0.085041	0.00555	0.045449
b0438	clpX	b0687	seqA	0.944899	0.952733	0.891036	0.944899	0.897631	0.900236	0.899501	0.897484	0.900554	0.987339	0.938775	-0.0538628	-0.006595	-0.0092	-0.008465	-0.006448	-0.009518	-0.096303	-0.047739
b3537	bcsF	b1428	ydcK	1.00298	0.98868	1.04769	0.98868	0.991662	0.991629	0.991639	0.950017	0.946833	1.01288	0.982946	0.0590055	0.056024	0.056057	0.056047	0.097669	0.100853	0.034806	0.06474
b2964	nupG	b0624	crcB	0.981494	1.07433	0.973154	0.981494	1.05582	1.05445	1.05489	0.982773	0.976042	1.02716	1.00629	-0.00833978	-0.082666	-0.081296	-0.081736	-0.009619	-0.002888	-0.05401	-0.033136
b4313	fimE	b0760	modF	0.989876	0.951069	0.983293	0.951069	0.940946	0.941441	0.941296	0.922603	0.922578	0.998191	0.955899	0.0322236	0.042347	0.041852	0.041997	0.06069	0.060715	-0.014898	0.027394
b0081	mraZ	b2945	endA	0.974165	0.885904	0.94892	0.885904	0.860069	0.863017	0.862213	0.87915	0.8841	0.95935	0.906228	0.0630163	0.088851	0.085903	0.086707	0.06977	0.06482	-0.01043	0.042692
b3376	yhfS	b1983	yeeN	0.9801	0.960314	0.937968	0.960314	0.940414	0.941204	0.940973	0.921829	0.92195	0.99948	0.956614	-0.0223457	-0.002446	-0.003236	-0.003005	0.016139	0.016018	-0.061512	-0.018646
b2961	mutY	b1034	ycdX	0.978816	1.10371	1.0029	0.978816	1.08253	1.08033	1.08105	0.996724	0.988443	1.03059	1.0127	0.0240829	-0.079631	-0.077431	-0.078151	0.006175	0.014456	-0.027688	-0.009797
b0398	sbcD	b2060	wzc	0.991938	0.911325	0.938376	0.911325	0.903263	0.903978	0.903775	0.902831	0.905013	0.980799	0.93194	0.0270513	0.035113	0.034398	0.034601	0.035545	0.033363	-0.042423	0.006436
b0190	yaeQ	b3706	mnmE	0.962066	0.945877	0.869782	0.945877	0.907943	0.909996	0.909412	0.90379	0.906047	0.988944	0.940773	-0.0760951	-0.038161	-0.040214	-0.03963	-0.034008	-0.036265	-0.119162	-0.070991
b1134	nudJ	b1749	xthA	0.988976	0.907314	0.919981	0.907314	0.89629	0.897312	0.897024	0.899004	0.901634	0.977718	0.927787	0.0126669	0.023691	0.022669	0.022957	0.020977	0.018347	-0.057737	-0.007806
b4388	serB	b2666	yqaE	0.979059	0.882508	0.928968	0.882508	0.861566	0.864027	0.863355	0.880187	0.88499	0.959042	0.905829	0.0464601	0.067402	0.064941	0.065613	0.048781	0.043978	-0.030074	0.023139
b1921	fliZ	b1764	selD	0.983815	0.942195	1.00158	0.942195	0.92601	0.926946	0.926676	0.914419	0.91535	0.993099	0.947736	0.0593848	0.07557	0.074634	0.074904	0.087161	0.08623	0.008481	0.053844
b2961	mutY	b1047	opgC	0.978816	0.944515	0.944912	0.944515	0.923331	0.924507	0.924168	0.912754	0.913902	0.992808	0.94686	0.000396781	0.021581	0.020405	0.020744	0.032158	0.03101	-0.047896	-0.001948
b0549	ybcO	b1631	rsxG	0.980724	0.938547	0.953906	0.938547	0.919271	0.920456	0.920115	0.910708	0.912074	0.990696	0.944104	0.0153587	0.034635	0.03345	0.033791	0.043198	0.041832	-0.03679	0.009802
b0297	eaeH	b2755	cas1	0.99361	1.04067	1.07273	0.99361	1.03428	1.03402	1.0341	0.972023	0.966425	1.02301	1.00082	0.0791234	0.038453	0.038713	0.038633	0.10071	0.106308	0.049725	0.071911
b3377	yhfT	b3360	pabA	0.983431	1.09707	1.01113	0.983431	1.0805	1.07889	1.07942	0.995888	0.987672	1.03016	1.01327	0.0277022	-0.069367	-0.067757	-0.068287	0.015245	0.023461	-0.019027	-0.00214
b4331	kptA	b1749	xthA	0.991258	0.907314	0.998261	0.907314	0.898572	0.899382	0.899154	0.900323	0.90279	0.978459	0.928898	0.0909469	0.099689	0.098879	0.099107	0.097938	0.095471	0.019802	0.069363
b0375	yaiV	b1758	ynjF	0.986227	1.10552	1.04706	0.986227	1.09175	1.0903	1.09077	1.00196	0.993049	1.03124	1.01653	0.0608301	-0.044693	-0.043243	-0.043713	0.045093	0.054008	0.015812	0.030527
b1158	pinE	b2756	casE	1.00013	1.1019	1.04594	1.00013	1.10203	1.10204	1.10203	1.00809	0.998398	1.03172	1.02241	0.0458178	-0.056085	-0.056095	-0.056085	0.037859	0.047547	0.014228	0.023535
b3377	yhfT	b1569	dicC	0.983431	1.00995	0.950071	0.983431	0.993383	0.993219	0.993269	0.949937	0.946881	1.01531	0.983284	-0.0333598	-0.043312	-0.043148	-0.043198	0.000134	0.00319	-0.06524	-0.033213
b0634	mrdB	b0702	ybfB	0.99211	0.995351	0.899074	0.99211	0.987461	0.987497	0.987486	0.947252	0.944444	1.01292	0.980658	-0.0930355	-0.088387	-0.088423	-0.088412	-0.048178	-0.04537	-0.113845	-0.081584
b2930	yggF	b3908	sodA	0.962851	1.01015	1.0095	0.962851	0.973	0.972623	0.972736	0.938145	0.93654	1.01218	0.974372	0.0466485	0.036499	0.036876	0.036763	0.071354	0.072959	-0.00268	0.035127
b0228	rayT	b1749	xthA	0.994956	0.907314	0.919191	0.907314	0.90227	0.902738	0.902606	0.90246	0.904666	0.979644	0.93075	0.0118769	0.016921	0.016453	0.016585	0.016731	0.014525	-0.060453	-0.011559
b1183	umuD	b2676	nrdF	0.984164	1.01846	0.974035	0.984164	1.00263	1.00233	1.00242	0.95485	0.951238	1.01742	0.987357	-0.0101288	-0.028595	-0.028295	-0.028385	0.019185	0.022797	-0.043381	-0.013322
b2912	fau	b3381	yhfX	0.98187	1.15576	1.07397	0.98187	1.13763	1.13481	1.13576	1.02594	1.01436	1.03518	1.02274	0.0920966	-0.063663	-0.060843	-0.061793	0.048023	0.059604	0.038787	0.051224
b0247	ykfG	b3908	sodA	0.976414	1.01015	1.00444	0.976414	0.986563	0.986324	0.986396	0.945985	0.943416	1.01431	0.980161	0.0280251	0.017876	0.018115	0.018043	0.058454	0.061023	-0.009873	0.024278
b1350	recE	b3158	yhbU	0.966743	1.03142	1.04121	0.966743	0.998164	0.997119	0.997439	0.951615	0.948473	1.01798	0.984919	0.0744626	0.043042	0.044087	0.043767	0.089591	0.092733	0.02323	0.056287
b3681	glvG	b0687	seqA	0.98171	0.952733	0.96695	0.952733	0.934443	0.935307	0.935056	0.918761	0.919217	0.996921	0.953009	0.0142174	0.032507	0.031643	0.031894	0.048189	0.047733	-0.029971	0.013941
b1749	xthA	b3706	mnmE	0.986282	0.945877	0.960866	0.945877	0.932159	0.932901	0.932686	0.917787	0.918324	0.995261	0.951103	0.0149889	0.028707	0.027965	0.02818	0.043079	0.042542	-0.034395	0.009763
b2236	yfaE	b0702	ybfB	0.969391	0.995351	1.00246	0.969391	0.964743	0.964885	0.964842	0.93412	0.932927	1.00909	0.970238	0.0330636	0.037712	0.03757	0.037613	0.068335	0.069528	-0.006633	0.032217
b0543	emrE	b3267	yhdV	0.982429	0.939229	0.992101	0.939229	0.921659	0.922726	0.922419	0.912054	0.913258	0.991451	0.945296	0.0528717	0.070442	0.069375	0.069682	0.080047	0.078843	0.00065	0.046805
b0190	yaeQ	b2666	yqaE	0.962066	0.882508	0.92882	0.882508	0.844574	0.849031	0.847832	0.870365	0.876376	0.951943	0.899232	0.0463121	0.084246	0.079789	0.080988	0.058455	0.052444	-0.023123	0.029588
b0228	rayT	b2900	yqfB	0.994956	1.05329	1.0369	0.994956	1.04825	1.04798	1.04807	0.97946	0.973019	1.02525	1.00602	0.0419396	-0.011354	-0.011084	-0.011174	0.057436	0.063877	0.01165	0.030879
b1916	sdiA	b1763	topB	0.946157	0.92281	0.876949	0.92281	0.868967	0.873123	0.871979	0.882428	0.887181	0.971964	0.921294	-0.0458611	0.007982	0.003826	0.00497	-0.005479	-0.010232	-0.095015	-0.044345
b4346	mcrB	b3807	cyaY	0.977574	0.955601	0.883819	0.955601	0.933175	0.934171	0.933881	0.917883	0.918463	0.997075	0.952805	-0.0717822	-0.049356	-0.050352	-0.050062	-0.034064	-0.034644	-0.113256	-0.068986
b0925	ldtD	b0517	allD	0.982099	0.930069	0.919844	0.930069	0.912168	0.91342	0.913062	0.907031	0.908802	0.987179	0.939462	-0.0102252	0.007676	0.006424	0.006782	0.012813	0.011042	-0.067335	-0.019618
b1460	ydcC	b3681	glvG	0.982487	1.14077	1.06721	0.982487	1.12326	1.1208	1.12162	1.0184	1.00766	1.03415	1.02116	0.0847217	-0.056051	-0.053591	-0.054411	0.048813	0.059551	0.033057	0.046051
b1510	ydeK	b0015	dnaJ	0.983142	1.12579	1.01357	0.983142	1.10893	1.10681	1.10751	1.01087	1.00097	1.03297	1.0191	0.0304312	-0.095357	-0.093237	-0.093937	0.002705	0.012601	-0.019402	-0.005523
b2113	mrp	b3266	acrF	0.995321	0.893145	0.990056	0.893145	0.888466	0.888966	0.888826	0.895197	0.898216	0.971869	0.921116	0.0969106	0.10159	0.10109	0.10123	0.094859	0.09184	0.018187	0.06894
b3381	yhfX	b0375	yaiV	0.980161	1.17984	1.0754	0.980161	1.16	1.15643	1.15766	1.03766	1.02477	1.03654	1.02397	0.0952436	-0.084595	-0.081025	-0.082255	0.037747	0.050633	0.038864	0.05144
b1374	pinR	b0892	rarA	0.995386	1.02612	1.02169	0.995386	1.0215	1.02138	1.02142	0.965372	0.96051	1.02047	0.996006	0.0263032	0.000189	0.000309	0.000269	0.056317	0.061179	0.001216	0.025683
b1532	marB	b3023	ygiV	0.981567	0.966425	0.946198	0.966425	0.947992	0.948611	0.948429	0.9259	0.925555	1.00204	0.960683	-0.020227	-0.001794	-0.002413	-0.002231	0.020298	0.020643	-0.055843	-0.014485
b0090	murG	b0789	clsB	1.0594	1.10289	1.16341	1.0594	1.16229	1.1684	1.16629	1.04287	1.02891	1.03475	1.05411	0.104009	0.001116	-0.004994	-0.002884	0.120539	0.134495	0.128656	0.109297
b1537	ydeJ	b1576	ydfD	0.991203	1.10603	1.00662	0.991203	1.09724	1.0963	1.09661	1.00511	0.99581	1.0316	1.019	0.0154125	-0.090624	-0.089684	-0.089994	0.001507	0.010806	-0.024981	-0.012382
b2565	recO	b0442	ybaV	0.988384	0.993511	0.986394	0.988384	0.981894	0.98197	0.981947	0.944127	0.941694	1.01182	0.977945	-0.00198957	0.0045	0.004424	0.004447	0.042267	0.0447	-0.025426	0.008449
b3861	yihF	b1428	ydcK	0.991875	0.98868	0.942327	0.98868	0.980556	0.980648	0.98062	0.943598	0.941202	1.01106	0.977269	-0.0463535	-0.038229	-0.038321	-0.038293	-0.001271	0.001125	-0.068734	-0.034942
b1239	ychG	b1442	ydcU	0.993087	0.95849	0.973257	0.95849	0.951576	0.951863	0.951778	0.928373	0.92768	1.00168	0.961763	0.0147675	0.021681	0.021394	0.021479	0.044884	0.045577	-0.028418	0.011494
b0213	yafS	b0279	yagM	0.987242	0.903177	0.95737	0.903177	0.890419	0.891654	0.891308	0.895819	0.898817	0.97485	0.924133	0.0541934	0.066951	0.065716	0.066062	0.061551	0.058553	-0.01748	0.033237
b4348	hsdS	b4351	mrr	0.990111	1.05005	0.958212	0.990111	1.04016	1.03966	1.03982	0.974946	0.969041	1.02425	1.00252	-0.0318988	-0.081948	-0.081448	-0.081608	-0.016734	-0.010829	-0.066042	-0.044305
b0890	ftsK	b3150	yraP	1.06262	1.00862	0.994114	1.00862	1.07123	1.07177	1.0716	0.995002	0.986402	1.0246	1.02776	-0.0145029	-0.077116	-0.077656	-0.077486	-0.000888	0.007712	-0.030482	-0.033645
b0148	hrpB	b3389	aroB	0.995036	0.890793	0.900894	0.890793	0.885829	0.886371	0.88622	0.893792	0.89697	0.970378	0.919302	0.010101	0.015065	0.014523	0.014674	0.007102	0.003924	-0.069484	-0.018408
b0948	rlmL	b3380	yhfW	0.993741	0.970189	0.906412	0.970189	0.96393	0.964117	0.964061	0.934922	0.93349	1.00581	0.968582	-0.0637768	-0.057518	-0.057705	-0.057649	-0.02851	-0.027078	-0.099395	-0.06217
b3996	nudC	b2547	yphE	0.962521	0.966407	0.955636	0.962521	0.928929	0.930188	0.929823	0.914883	0.915891	0.997772	0.952596	-0.00688547	0.026707	0.025448	0.025813	0.040753	0.039745	-0.042136	0.00304
b1808	yoaA	b0547	ybcN	0.956501	1.1165	1.02316	0.956501	1.073	1.06793	1.06957	0.99057	0.983116	1.03052	1.00566	0.0666603	-0.049839	-0.044769	-0.046409	0.032591	0.040045	-0.00736	0.017497
b2412	zipA	b0711	ybgJ	1.07748	1.2328	1.14448	1.07748	1.31028	1.32832	1.32148	1.12184	1.09891	1.04018	1.06868	0.0670047	-0.1658	-0.18384	-0.177	0.022638	0.045573	0.104299	0.075799
b0880	cspD	b3937	yiiX	0.967539	0.963047	0.961904	0.963047	0.930586	0.931786	0.931438	0.91601	0.916862	0.997635	0.952747	-0.00114291	0.031318	0.030118	0.030466	0.045894	0.045042	-0.035731	0.009157
b4056	yjbQ	b0714	nei	0.991003	1.10318	1.02826	0.991003	1.09418	1.09325	1.09356	1.00349	0.994372	1.0313	1.01827	0.0372617	-0.065915	-0.064985	-0.065295	0.024778	0.033893	-0.003034	0.009997
b0213	yafS	b1749	xthA	0.987242	0.907314	0.903734	0.907314	0.894556	0.895739	0.895406	0.898001	0.900755	0.97715	0.926957	-0.00358005	0.009178	0.007995	0.008328	0.005733	0.002979	-0.073416	-0.023223
b0090	murG	b0375	yaiV	1.0594	1.17984	1.15542	1.0594	1.23924	1.24992	1.24604	1.08346	1.06494	1.03857	1.06208	0.0960181	-0.083825	-0.094505	-0.090625	0.071959	0.090472	0.116849	0.093332
b4365	yjjQ	b2124	yehS	0.997163	0.900543	0.906978	0.900543	0.897707	0.897989	0.897909	0.900165	0.902614	0.976701	0.927241	0.00643457	0.009271	0.008989	0.009069	0.006813	0.004364	-0.069723	-0.020263
b2826	ppdA	b0246	yafW	0.991123	1.02454	0.998085	0.991123	1.01566	1.01544	1.01551	0.962077	0.957611	1.01963	0.993251	0.00696172	-0.017575	-0.017355	-0.017425	0.036008	0.040474	-0.021549	0.004834
b1374	pinR	b1413	hrpA	0.995386	0.853858	0.895994	0.853858	0.849244	0.849918	0.849736	0.874512	0.879853	0.945546	0.891921	0.0421361	0.04675	0.046076	0.046258	0.021482	0.016141	-0.049552	0.004073
b2964	nupG	b0689	ybfP	0.981494	1.02417	0.981108	0.981494	1.00566	1.00521	1.00535	0.956314	0.952554	1.01833	0.988513	-0.000385777	-0.024552	-0.024102	-0.024242	0.024794	0.028554	-0.037219	-0.007405
b1564	relB	b4175	hflC	0.992259	1.08729	1.06409	0.992259	1.07955	1.07887	1.07909	0.995833	0.98757	1.02965	1.015	0.0718351	-0.015456	-0.014776	-0.014996	0.068261	0.076524	0.034447	0.049098
b0924	mukB	b2304	yfcH	0.994128	0.936105	0.961147	0.936105	0.930233	0.930608	0.930499	0.917168	0.917726	0.993141	0.949006	0.0250417	0.030914	0.030539	0.030648	0.043979	0.043421	-0.031994	0.012141
b1755	ynjC	b1184	umuC	0.981759	1.00614	1	0.981759	0.987903	0.987791	0.987825	0.946962	0.94425	1.01411	0.980781	0.0182407	0.012097	0.012209	0.012175	0.053038	0.05575	-0.01411	0.019219
b0398	sbcD	b1441	ydcT	0.991938	1.03821	0.982298	0.991938	1.03015	1.02984	1.02994	0.969761	0.964428	1.02239	0.999075	-0.00963997	-0.047852	-0.047542	-0.047642	0.012537	0.01787	-0.040089	-0.016777
b0396	araJ	b4526	ydaE	0.987742	0.891252	0.942843	0.891252	0.878995	0.880328	0.879958	0.889819	0.893488	0.968011	0.91604	0.0515905	0.063848	0.062515	0.062885	0.053024	0.049355	-0.025168	0.026803
b0491	fetB	b0779	uvrB	0.98448	1.15713	1.05385	0.98448	1.14161	1.13917	1.14	1.02817	1.01633	1.03537	1.02408	0.0693693	-0.087761	-0.085321	-0.086151	0.025675	0.037522	0.018479	0.029768
b1344	ttcA	b1963	yedR	0.980426	1.03657	0.992206	0.980426	1.017	1.01628	1.01651	0.962242	0.957823	1.02077	0.992978	0.0117799	-0.024794	-0.024074	-0.024304	0.029964	0.034383	-0.02856	-0.000772
b1864	yebC	b1750	ydjX	0.984056	0.976179	1.01327	0.976179	0.960235	0.960615	0.960502	0.932484	0.931384	1.00587	0.967091	0.0370918	0.053036	0.052656	0.052769	0.080787	0.081887	0.007406	0.04618
b3191	mlaB	b1158	pinE	0.928878	0.955864	0.880333	0.928878	0.884742	0.887881	0.887005	0.889875	0.893898	0.984203	0.935911	-0.0485448	-0.004409	-0.007548	-0.006672	-0.009542	-0.013565	-0.10387	-0.055578
b1061	dinI	b1065	mdtH	0.976655	0.995046	0.961031	0.976655	0.971701	0.971816	0.971782	0.938158	0.936466	1.01027	0.973244	-0.0156236	-0.01067	-0.010785	-0.010751	0.022873	0.024565	-0.049243	-0.012213
b2068	alkA	b3068	mug	0.993667	0.972735	0.970138	0.972735	0.966402	0.966575	0.966523	0.936222	0.934644	1.00661	0.969916	-0.00259708	0.003736	0.003563	0.003615	0.033916	0.035494	-0.036473	0.000222
b4372	holD	b0148	hrpB	0.980126	0.919554	1.0005	0.919554	0.899679	0.901278	0.900826	0.900344	0.902878	0.981391	0.931831	0.0809493	0.100824	0.099225	0.099677	0.100159	0.097625	0.019112	0.068672
b2170	setB	b1914	uvrY	0.991896	0.815154	0.895532	0.815154	0.80705	0.808548	0.80816	0.85208	0.859961	0.910671	0.858837	0.0803784	0.088482	0.086984	0.087372	0.043452	0.035571	-0.015139	0.036695
b3179	rlmE	b2830	rppH	1.02061	0.863956	0.932238	0.863956	0.884561	0.881758	0.882536	0.894416	0.897367	0.963247	0.914182	0.0682823	0.047677	0.05048	0.049702	0.037822	0.034871	-0.031009	0.018056
b1114	mfd	b3150	yraP	0.943209	1.00862	0.911016	0.943209	0.951826	0.951337	0.951481	0.925984	0.925864	1.00835	0.966305	-0.0321933	-0.04081	-0.040321	-0.040465	-0.014968	-0.014848	-0.097337	-0.055289
b2826	ppdA	b1564	relB	0.991123	1.09448	1.05317	0.991123	1.0856	1.08476	1.08504	0.998968	0.990359	1.03039	1.01628	0.0620447	-0.032432	-0.031592	-0.031872	0.0542	0.062809	0.022783	0.036892
b2304	yfcH	b0702	ybfB	1.01299	0.995351	1.00683	0.995351	1.00834	1.00828	1.0083	0.959321	0.955031	1.01607	0.991622	0.0114769	-0.001512	-0.001452	-0.001472	0.047507	0.051797	-0.009239	0.015206
b3047	yqiH	b0247	ykfG	0.986536	0.926772	0.943211	0.926772	0.913308	0.914294	0.914012	0.907857	0.909507	0.986878	0.939432	0.016439	0.029903	0.028917	0.029199	0.035354	0.033704	-0.043667	0.003779
b2819	recD	b2758	casC	0.938708	0.895221	0.944855	0.895221	0.833929	0.840351	0.838637	0.863569	0.870486	0.951001	0.901252	0.0496344	0.110926	0.104504	0.106218	0.081286	0.074369	-0.006146	0.043603
b1159	mcrA	b1332	ynaJ	0.978025	1.10875	1.06838	0.978025	1.08678	1.08439	1.08517	0.998925	0.990402	1.03107	1.01344	0.0903575	-0.018398	-0.016008	-0.016788	0.069457	0.07798	0.037311	0.054939
b0960	yccS	b2467	nudK	0.945688	0.961918	0.960601	0.945688	0.907606	0.909675	0.909086	0.902785	0.905255	0.991733	0.944129	0.0149128	0.052995	0.050926	0.051515	0.057816	0.055346	-0.031132	0.016472
b4415	hokE	b1569	dicC	0.998871	1.00995	1.07987	0.998871	1.00882	1.00881	1.00882	0.958862	0.954709	1.01749	0.990851	0.0810037	0.071055	0.071065	0.071055	0.121013	0.125166	0.062388	0.089024
b0094	ftsA	b2930	yggF	0.933428	0.987718	1.02131	0.933428	0.921147	0.921964	0.921729	0.909307	0.91112	0.999253	0.953526	0.0878795	0.100161	0.099344	0.099579	0.112001	0.110188	0.022055	0.067782
b2863	ygeQ	b3348	slyX	0.979894	1.04765	1.01984	0.979894	1.02754	1.02659	1.02689	0.967777	0.96274	1.02279	0.996847	0.0399444	-0.007702	-0.006752	-0.007052	0.052061	0.057098	-0.002948	0.022991
b3933	ftsN	b3281	aroE	0.948462	0.827383	0.910367	0.827383	0.775845	0.784741	0.782498	0.833425	0.843667	0.897086	0.853363	0.0829839	0.134522	0.125626	0.127869	0.076942	0.0667	0.013281	0.057004
b3387	dam	b3681	glvG	0.96252	1.14077	1.03799	0.96252	1.10329	1.09802	1.09976	1.00685	0.997536	1.0332	1.0123	0.0754707	-0.065299	-0.060029	-0.061769	0.031137	0.040455	0.004793	0.02569
b1336	abgT	b0632	dacA	0.990837	0.880437	0.920919	0.880437	0.871274	0.872369	0.872068	0.885902	0.889992	0.962351	0.909733	0.0404821	0.049645	0.04855	0.048851	0.035017	0.030927	-0.041432	0.011186
b2304	yfcH	b1656	sodB	1.01299	0.915236	0.98198	0.915236	0.928227	0.927126	0.927444	0.917063	0.917518	0.988907	0.945916	0.0667435	0.053753	0.054854	0.054536	0.064917	0.064462	-0.006927	0.036064
b0081	mraZ	b3360	pabA	0.974165	1.09707	1.06924	0.974165	1.07123	1.06873	1.06954	0.990533	0.982975	1.02952	1.00904	0.0950705	-0.001994	0.000506	-0.000304	0.078703	0.086261	0.039716	0.060192
b3068	mug	b3389	aroB	0.988112	0.890793	0.936555	0.890793	0.878905	0.880203	0.879844	0.88979	0.89346	0.967865	0.915889	0.045762	0.05765	0.056352	0.056711	0.046765	0.043095	-0.03131	0.020666
b2113	mrp	b0490	fetA	0.995321	1.0289	1.03417	0.995321	1.02422	1.02408	1.02413	0.966803	0.96178	1.02101	0.997103	0.0388465	0.009947	0.010087	0.010037	0.067364	0.072387	0.013153	0.037064
b4388	serB	b1913	uvrC	0.979059	1.0292	0.955813	0.979059	1.00826	1.00764	1.00783	0.95756	0.953675	1.01909	0.989448	-0.0232455	-0.052447	-0.051827	-0.052017	-0.001747	0.002138	-0.063281	-0.033635
b4044	dinF	b3034	nudF	0.984683	1.00717	1.03068	0.984683	0.991852	0.991742	0.991776	0.949193	0.946213	1.01481	0.982615	0.0459919	0.038823	0.038933	0.038899	0.081482	0.084462	0.015865	0.04806
b3046	yqiG	b1764	selD	0.983069	0.942195	0.930273	0.942195	0.925265	0.926243	0.925961	0.913988	0.914972	0.992907	0.947391	-0.0119222	0.005008	0.00403	0.004312	0.016285	0.015301	-0.062634	-0.017118
b1530	marR	b1158	pinE	0.987244	0.955864	0.971249	0.955864	0.943109	0.943672	0.943507	0.923611	0.923489	0.999419	0.957407	0.0153846	0.02814	0.027577	0.027742	0.047638	0.04776	-0.02817	0.013842
b0624	crcB	b2112	yehE	1.00317	1.03109	0.989705	1.00317	1.03425	1.03435	1.03432	0.972493	0.966784	1.02232	1.00197	-0.0134638	-0.044545	-0.044645	-0.044615	0.017212	0.022921	-0.032611	-0.012264
b2212	alkB	b0892	rarA	1.00567	1.02612	0.99035	1.00567	1.03179	1.03194	1.03189	0.971319	0.965726	1.02167	1.00128	-0.0153241	-0.04144	-0.04159	-0.04154	0.019031	0.024624	-0.031321	-0.010934
b1065	mdtH	b4044	dinF	0.970324	0.980654	1.04357	0.970324	0.950978	0.951552	0.951382	0.926907	0.926518	1.00462	0.963314	0.0732474	0.092593	0.092019	0.092189	0.116664	0.117053	0.038947	0.080257
b3584	yiaT	b3034	nudF	0.991784	1.00717	1.02321	0.991784	0.998953	0.998894	0.998913	0.953297	0.949813	1.01585	0.986037	0.0314237	0.024255	0.024314	0.024295	0.069911	0.073395	0.007358	0.037171
b0094	ftsA	b1115	ycfT	0.933428	0.868895	0.846323	0.868895	0.802323	0.811051	0.80879	0.846632	0.855483	0.927588	0.881734	-0.0225716	0.044	0.035272	0.037533	-0.000309	-0.00916	-0.081265	-0.035411
b1631	rsxG	b2509	xseA	0.987213	1.03631	0.9952	0.987213	1.02352	1.02306	1.0232	0.966024	0.961139	1.0215	0.996059	0.00798738	-0.02832	-0.02786	-0.028	0.029176	0.034061	-0.026303	-0.000859
b0233	yafO	b2230	yfaA	0.996024	1.05401	1.06316	0.996024	1.05004	1.04982	1.04989	0.980456	0.973897	1.02546	1.00679	0.0671369	0.013121	0.013341	0.013271	0.082705	0.089264	0.037703	0.056369
b3377	yhfT	b0178	skp	0.983431	0.94909	0.931135	0.94909	0.932521	0.933365	0.933119	0.917834	0.918383	0.995874	0.951671	-0.0179552	-0.001386	-0.00223	-0.001984	0.013301	0.012752	-0.064739	-0.020536
b1034	ycdX	b0550	rusA	0.97966	0.939971	0.976281	0.939971	0.919631	0.920852	0.920501	0.910844	0.912201	0.991045	0.944494	0.0363102	0.05665	0.055429	0.05578	0.065437	0.06408	-0.014764	0.031787
b4056	yjbQ	b2930	yggF	0.991003	0.987718	0.94397	0.987718	0.978721	0.978832	0.978799	0.942586	0.940309	1.01064	0.976359	-0.0437481	-0.034751	-0.034862	-0.034829	0.001384	0.003661	-0.066671	-0.032389
b4505	ykgN	b3348	slyX	0.990051	1.04765	1.00666	0.990051	1.0377	1.03723	1.03738	0.973649	0.96789	1.02385	1.00164	0.0166036	-0.031045	-0.030575	-0.030725	0.033006	0.038765	-0.017192	0.005016
b1576	ydfD	b1626	ydgK	0.987586	1.01245	1.07037	0.987586	1.00004	0.999883	0.999931	0.953657	0.950158	1.0165	0.986366	0.0827834	0.070329	0.070486	0.070438	0.116712	0.120211	0.053864	0.084003
b2964	nupG	b1749	xthA	0.981494	0.907314	0.980691	0.907314	0.888808	0.890523	0.890043	0.894679	0.89784	0.975237	0.924305	0.0733769	0.091883	0.090168	0.090648	0.086012	0.082851	0.005454	0.056386
b4532	hicA	b3155	yhbQ	0.973431	1.00704	0.93985	0.973431	0.98047	0.980283	0.98034	0.94262	0.940448	1.01305	0.97744	-0.0335807	-0.04062	-0.040433	-0.04049	-0.00277	-0.000598	-0.073196	-0.03759
b4416	rybA	b3023	ygiV	0.981152	0.966425	0.96337	0.966425	0.947577	0.94821	0.948024	0.925661	0.925345	1.00195	0.960493	-0.00305496	0.015793	0.01516	0.015346	0.037709	0.038025	-0.038582	0.002877
b4505	ykgN	b0247	ykfG	0.990051	0.926772	0.940225	0.926772	0.916823	0.917552	0.917343	0.909889	0.91129	0.987873	0.941121	0.013453	0.023402	0.022673	0.022882	0.030336	0.028935	-0.047648	-0.000896
b1183	umuD	b2509	xseA	0.984164	1.03631	1.00023	0.984164	1.02047	1.0199	1.02008	0.964262	0.959593	1.02115	0.994614	0.0160712	-0.020235	-0.019665	-0.019845	0.035973	0.040642	-0.020917	0.005621
b1352	kilR	b3361	fic	1.00634	1.02248	0.931663	1.00634	1.02882	1.02897	1.02892	0.969788	0.964363	1.02105	1.00014	-0.0746784	-0.097157	-0.097307	-0.097257	-0.038125	-0.0327	-0.089389	-0.068479
b2002	yeeS	b2676	nrdF	0.987206	1.01846	0.968295	0.987206	1.00567	1.00543	1.00551	0.956608	0.95278	1.01782	0.9888	-0.0189105	-0.037375	-0.037135	-0.037215	0.011687	0.015515	-0.04953	-0.020505
b2954	rdgB	b1750	ydjX	0.976373	0.976179	0.964515	0.976179	0.952552	0.953115	0.952949	0.928043	0.927489	1.00434	0.963595	-0.0116642	0.011963	0.0114	0.011566	0.036472	0.037026	-0.039825	0.00092
b4000	hupA	b0059	hepA	0.916472	0.954317	0.901688	0.916472	0.870789	0.874605	0.873553	0.881888	0.886884	0.979593	0.932143	-0.014784	0.030899	0.027083	0.028135	0.0198	0.014804	-0.077905	-0.030455
b3095	yqjA	b1365	ynaK	0.939631	1.00881	0.982279	0.939631	0.948444	0.947912	0.948069	0.924019	0.924142	1.00776	0.965172	0.0426481	0.033835	0.034367	0.03421	0.05826	0.058137	-0.025477	0.017107
b0132	yadD	b1176	minC	0.974925	0.971055	1.03919	0.971055	0.94598	0.946706	0.946493	0.924503	0.924356	1.00227	0.960232	0.0681372	0.093212	0.092486	0.092699	0.114689	0.114836	0.036923	0.07896
b3046	yqiG	b3389	aroB	0.983069	0.890793	0.907419	0.890793	0.873863	0.875711	0.875201	0.886875	0.890903	0.965989	0.913548	0.016626	0.033556	0.031708	0.032218	0.020544	0.016516	-0.05857	-0.006129
b2358	yfdO	b1195	ymgE	0.971109	0.954794	0.93341	0.954794	0.925903	0.927209	0.926832	0.91372	0.914807	0.995184	0.949564	-0.0213844	0.007507	0.006201	0.006578	0.01969	0.018603	-0.061774	-0.016154
b0090	murG	b0544	ybcK	1.0594	1.00762	1.05692	1.00762	1.06702	1.06747	1.06732	0.992615	0.984302	1.02411	1.02526	0.0493002	-0.0101	-0.01055	-0.0104	0.064305	0.072618	0.032807	0.031657
b2113	mrp	b1564	relB	0.995321	1.09448	1.04463	0.995321	1.0898	1.08936	1.0895	1.00139	0.992487	1.03066	1.01831	0.0493135	-0.045166	-0.044726	-0.044866	0.04324	0.052147	0.013975	0.026329
b0081	mraZ	b3448	yhhA	0.974165	0.988807	1.05263	0.974165	0.962973	0.963262	0.963176	0.933428	0.932283	1.00798	0.969089	0.0784685	0.089661	0.089372	0.089458	0.119206	0.120351	0.044657	0.083545
b2304	yfcH	b1458	yncI	1.01299	1.05184	0.979164	1.01299	1.06483	1.06551	1.06529	0.989117	0.981481	1.02666	1.01479	-0.0338265	-0.085666	-0.086346	-0.086126	-0.009953	-0.002317	-0.047491	-0.035626
b3182	dacB	b1065	mdtH	0.99006	0.995046	1.07618	0.99006	0.985106	0.985155	0.98514	0.945906	0.943262	1.01251	0.979504	0.0861161	0.09107	0.091021	0.091036	0.13027	0.132914	0.063666	0.096672
b3743	asnC	b2068	alkA	0.993282	0.922532	0.953859	0.922532	0.915814	0.916335	0.916186	0.90952	0.910942	0.986787	0.939995	0.0313269	0.038045	0.037524	0.037673	0.044339	0.042917	-0.032928	0.013864
b1921	fliZ	b3158	yhbU	0.983815	1.03142	0.929518	0.983815	1.01524	1.01473	1.01489	0.961483	0.957128	1.02014	0.992539	-0.0542971	-0.085722	-0.085212	-0.085372	-0.031965	-0.02761	-0.090626	-0.063021
b1348	ralR	b1749	xthA	0.986178	0.907314	0.973427	0.907314	0.893492	0.894773	0.894414	0.897387	0.900215	0.9768	0.926455	0.0661129	0.079935	0.078654	0.079013	0.07604	0.073212	-0.003373	0.046972
b3681	glvG	b1633	nth	0.98171	1.06431	0.97894	0.98171	1.04602	1.04484	1.04522	0.977614	0.971461	1.02572	1.00332	-0.00277039	-0.06708	-0.0659	-0.06628	0.001326	0.007479	-0.046781	-0.02438
b1060	bssS	b2002	yeeS	0.980768	1.11879	1.01651	0.980768	1.09956	1.09727	1.09803	1.00581	0.996493	1.03222	1.01673	0.0357451	-0.083047	-0.080757	-0.081517	0.010707	0.02002	-0.015708	-0.000213
b3382	yhfY	b0939	elfD	0.987553	0.884848	0.902552	0.884848	0.872401	0.873834	0.873439	0.886331	0.890393	0.963927	0.911361	0.0177041	0.030151	0.028718	0.029113	0.016221	0.012159	-0.061375	-0.008809
b3996	nudC	b2113	mrp	0.962521	0.993044	0.953936	0.962521	0.955566	0.955826	0.955749	0.928933	0.928364	1.00712	0.9663	-0.00858547	-0.00163	-0.00189	-0.001813	0.025003	0.025572	-0.053187	-0.012364
b4357	lgoR	b1960	vsr	0.990784	1.01722	1.02416	0.990784	1.008	1.00784	1.00789	0.958019	0.954011	1.01802	0.989996	0.0333743	0.016158	0.016318	0.016268	0.066139	0.070147	0.006133	0.034162
b0147	thpR	b0548	ninE	0.968774	1.03451	0.990161	0.968774	1.00328	1.0022	1.00254	0.954417	0.950948	1.01891	0.986994	0.0213867	-0.013119	-0.012039	-0.012379	0.035744	0.039213	-0.02875	0.003167
b0147	thpR	b4056	yjbQ	0.968774	0.962598	0.925635	0.962598	0.931372	0.93254	0.932201	0.916487	0.917278	0.997749	0.953003	-0.0369627	-0.005737	-0.006905	-0.006566	0.009148	0.008357	-0.072114	-0.027368
b1546	tfaQ	b0285	paoB	0.994448	1.03734	1.06234	0.994448	1.03178	1.03158	1.03164	0.970749	0.965289	1.0225	0.999977	0.0678909	0.030559	0.030759	0.030699	0.09159	0.09705	0.039838	0.062362
b3635	mutM	b4170	mutL	0.976245	0.897641	0.890214	0.897641	0.873886	0.876318	0.875646	0.886543	0.89065	0.967698	0.915381	-0.00742733	0.016328	0.013896	0.014568	0.003671	-0.000436	-0.077484	-0.025167
b0232	yafN	b3807	cyaY	0.994647	0.955601	0.941936	0.955601	0.950249	0.950486	0.950416	0.927752	0.927119	1.00097	0.960897	-0.0136652	-0.008313	-0.00855	-0.00848	0.014184	0.014817	-0.059033	-0.018961
b3386	rpe	b0442	ybaV	0.98226	0.993511	1.05052	0.98226	0.975771	0.975886	0.975851	0.940588	0.938589	1.0108	0.975048	0.0682647	0.074754	0.074639	0.074674	0.109937	0.111936	0.039729	0.075477
b0397	sbcC	b0550	rusA	0.993285	0.939971	0.955196	0.939971	0.933256	0.933659	0.933542	0.91872	0.919109	0.994557	0.950955	0.0152252	0.02194	0.021537	0.021654	0.036476	0.036087	-0.039361	0.004241
b1914	uvrY	b3280	yrdB	0.974181	1.08482	1.07169	0.974181	1.059	1.05681	1.05751	0.984078	0.977246	1.02799	1.00592	0.097513	0.012694	0.014884	0.014184	0.087616	0.094448	0.043702	0.065773
b2304	yfcH	b1983	yeeN	1.01299	0.960314	1.03982	0.960314	0.973304	0.972789	0.972943	0.94084	0.938625	1.00635	0.973428	0.0795083	0.066518	0.067033	0.066879	0.098982	0.101197	0.033474	0.066394
b2962	yggX	b1047	opgC	0.981309	0.944515	0.930386	0.944515	0.925824	0.926861	0.926562	0.914194	0.915166	0.993447	0.947981	-0.0141292	0.004562	0.003525	0.003824	0.016192	0.01522	-0.063061	-0.017595
b0422	xseB	b1656	sodB	0.993677	0.915236	0.963464	0.915236	0.908913	0.909449	0.909297	0.9059	0.907726	0.983334	0.935415	0.0482275	0.054551	0.054015	0.054167	0.057564	0.055738	-0.01987	0.028049
b0912	ihfB	b1569	dicC	0.957642	1.00995	1.04137	0.957642	0.967595	0.967173	0.967299	0.935031	0.933807	1.01127	0.97221	0.0837236	0.073771	0.074193	0.074067	0.106335	0.107559	0.030101	0.069156
b0436	tig	b3014	yqhH	0.985938	1.12751	1.05702	0.985938	1.11345	1.11166	1.11226	1.0134	1.0032	1.03326	1.02069	0.0710768	-0.056435	-0.054645	-0.055245	0.043619	0.053816	0.023751	0.036325
b3163	nlpI	b2676	nrdF	0.986968	1.01846	0.986202	0.986968	1.00543	1.00519	1.00527	0.956471	0.95266	1.01779	0.988686	-0.000766365	-0.019228	-0.018988	-0.019068	0.029731	0.033542	-0.031592	-0.002484
b1759	nudG	b3023	ygiV	0.987171	0.966425	0.927828	0.966425	0.953596	0.954027	0.9539	0.92914	0.928397	1.00322	0.963308	-0.038597	-0.025768	-0.026199	-0.026072	-0.001312	-0.000569	-0.075394	-0.03548
b2698	recX	b1219	ychN	0.985106	0.862925	0.908182	0.862925	0.848031	0.850072	0.849522	0.873353	0.878887	0.947726	0.893941	0.0452571	0.060151	0.05811	0.05866	0.034829	0.029295	-0.039544	0.014241
b0981	etk	b1560	ydfU	1.00651	0.968556	0.919395	0.968556	0.975064	0.974859	0.974921	0.94144	0.939197	1.00772	0.97437	-0.0491613	-0.055669	-0.055464	-0.055526	-0.022045	-0.019802	-0.088322	-0.054975
b1445	ortT	b3807	cyaY	0.966871	0.955601	0.985673	0.955601	0.922472	0.923943	0.923519	0.911696	0.913036	0.994465	0.94829	0.0300718	0.063201	0.06173	0.062154	0.073977	0.072637	-0.008792	0.037383
b1861	ruvA	b0549	ybcO	1.00664	0.985475	0.984117	0.985475	0.99211	0.992014	0.992043	0.950438	0.947184	1.01261	0.983294	-0.00135772	-0.007993	-0.007897	-0.007926	0.033679	0.036933	-0.028493	0.000823
b3183	obgE	b3280	yrdB	0.986429	1.08482	1.02136	0.986429	1.07124	1.07009	1.07047	0.991158	0.983455	1.02893	1.01155	0.0349281	-0.049883	-0.048733	-0.049113	0.030199	0.037902	-0.007573	0.009803
b3047	yqiH	b2954	rdgB	0.986536	0.944648	0.972397	0.944648	0.931184	0.931929	0.931713	0.917286	0.917878	0.994817	0.950489	0.0277489	0.041213	0.040468	0.040684	0.055111	0.054519	-0.02242	0.021908
b0938	elfA	b2830	rppH	0.962564	0.863956	0.881823	0.863956	0.82652	0.831613	0.830265	0.860867	0.867941	0.938045	0.885771	0.0178673	0.055303	0.05021	0.051558	0.020956	0.013882	-0.056222	-0.003948
b0245	ykfI	b3179	rlmE	0.989701	0.877964	0.917681	0.877964	0.867665	0.868922	0.868577	0.883942	0.888258	0.960275	0.907368	0.0397172	0.050016	0.048759	0.049104	0.033739	0.029423	-0.042594	0.010313
b1630	rsxD	b2892	recJ	0.974636	0.86498	0.957811	0.86498	0.839616	0.843041	0.842124	0.868385	0.874541	0.944532	0.891006	0.0928314	0.118195	0.11477	0.115687	0.089426	0.08327	0.013279	0.066805
b0090	murG	b4058	uvrA	1.0594	0.94974	1.01551	0.94974	1.00914	1.00615	1.00707	0.962086	0.957201	1.0115	0.997211	0.0657725	0.006373	0.009363	0.008443	0.053427	0.058312	0.004012	0.018302
b0083	ftsL	b3248	yhdE	0.977665	0.966513	0.990048	0.966513	0.944178	0.944926	0.944707	0.923692	0.923618	1.00123	0.95897	0.0235347	0.04587	0.045122	0.045341	0.066356	0.06643	-0.011184	0.031078
b1065	mdtH	b0962	helD	0.970324	0.947918	0.924661	0.947918	0.918242	0.919788	0.919344	0.90964	0.91119	0.992075	0.945242	-0.0232573	0.006419	0.004873	0.005317	0.015021	0.013471	-0.067414	-0.020581
b1413	hrpA	b1441	ydcT	0.980852	1.03821	1.00368	0.980852	1.01907	1.01833	1.01856	0.963353	0.958807	1.02114	0.993802	0.0228314	-0.015387	-0.014647	-0.014877	0.04033	0.044876	-0.017453	0.009881
b0147	thpR	b1179	ycgL	0.968774	1.16188	1.05804	0.968774	1.13065	1.1256	1.1273	1.0216	1.01059	1.03506	1.01753	0.0892697	-0.072606	-0.067556	-0.069256	0.036444	0.047457	0.02298	0.040519
b0231	dinB	b2236	yfaE	0.9977	1.14101	1.07969	0.9977	1.13871	1.13839	1.1385	1.02731	1.01548	1.03483	1.02832	0.081993	-0.059017	-0.058697	-0.058807	0.05238	0.064212	0.044867	0.051368
b1184	umuC	b4174	hflK	0.978842	0.979518	0.894216	0.978842	0.95836	0.958793	0.958665	0.931231	0.930304	1.00593	0.966443	-0.0846263	-0.064144	-0.064577	-0.064449	-0.037015	-0.036088	-0.111717	-0.072227
b0421	ispA	b2675	nrdE	0.976678	0.998593	1.03723	0.976678	0.975271	0.975303	0.975294	0.940042	0.938139	1.01128	0.974953	0.060551	0.061958	0.061926	0.061935	0.097187	0.09909	0.025947	0.062276
b0921	smtA	b4389	radA	0.978559	1.08589	0.999219	0.978559	1.06444	1.0626	1.06319	0.987173	0.979966	1.02847	1.00819	0.0206603	-0.065221	-0.063381	-0.063971	0.012046	0.019253	-0.029252	-0.008968
b0397	sbcC	b1159	mcrA	0.993285	0.93235	0.907612	0.93235	0.925635	0.926089	0.925958	0.9147	0.915541	0.991291	0.946247	-0.0247381	-0.018023	-0.018477	-0.018346	-0.007088	-0.007929	-0.083679	-0.038635
b1361	ydaW	b0839	dacC	0.999397	0.942571	0.931101	0.942571	0.941968	0.942002	0.941992	0.923624	0.923425	0.997101	0.955666	-0.0114696	-0.010867	-0.010901	-0.010891	0.007477	0.007676	-0.066	-0.024565
b3023	ygiV	b0542	renD	0.985028	0.992156	1.01903	0.985028	0.977184	0.977301	0.977266	0.941473	0.939358	1.01088	0.975681	0.0340028	0.041847	0.04173	0.041765	0.077558	0.079673	0.008149	0.04335
b0258	ykfC	b2929	yggD	0.998515	1.0164	0.968183	0.998515	1.01491	1.01489	1.01489	0.962054	0.957546	1.01886	0.9935	-0.0303323	-0.046727	-0.046707	-0.046707	0.006129	0.010637	-0.050672	-0.025317
b4388	serB	b2928	yggC	0.979059	1.10827	1.02654	0.979059	1.08732	1.08506	1.0858	0.999266	0.990698	1.03109	1.01381	0.0474845	-0.060777	-0.058517	-0.059257	0.027277	0.035845	-0.004542	0.012733
b0681	chiP	b0689	ybfP	0.970921	1.02417	1.06222	0.970921	0.995087	0.994384	0.994599	0.950203	0.947194	1.0169	0.983775	0.0912985	0.067133	0.067836	0.067621	0.112017	0.115026	0.045317	0.078445
b2580	ung	b4171	miaA	0.991904	0.840801	0.912549	0.840801	0.832705	0.833994	0.833652	0.865613	0.871974	0.933512	0.879866	0.0717482	0.079844	0.078555	0.078897	0.046936	0.040575	-0.020963	0.032683
b1336	abgT	b3381	yhfX	0.990837	1.15576	1.07757	0.990837	1.1466	1.14517	1.14566	1.03113	1.01891	1.03552	1.02688	0.0867333	-0.06903	-0.0676	-0.06809	0.046443	0.058661	0.042046	0.050692
b1864	yebC	b1960	vsr	0.984056	1.01722	1.03586	0.984056	1.00127	1.001	1.00108	0.954131	0.9506	1.01712	0.986771	0.0518041	0.03459	0.03486	0.03478	0.081729	0.08526	0.018742	0.049089
b1238	tdk	b1731	cedA	0.977	0.996293	1.08443	0.977	0.973293	0.973379	0.973353	0.939015	0.937225	1.01069	0.973999	0.10743	0.111137	0.111051	0.111077	0.145415	0.147205	0.07374	0.110431
b1352	kilR	b1134	nudJ	1.00634	0.964852	1.05765	0.964852	0.971194	0.970971	0.971037	0.93939	0.937379	1.00652	0.972252	0.0927978	0.086456	0.086679	0.086613	0.11826	0.120271	0.051127	0.085398
b1219	ychN	b2627	abpB	0.983425	1.01126	1.08235	0.983425	0.994685	0.994498	0.994555	0.950623	0.94749	1.01563	0.983865	0.0989215	0.087661	0.087848	0.087791	0.131723	0.134856	0.066718	0.098481
b2356	yfdM	b1114	mfd	0.983867	0.876457	0.88924	0.876457	0.860324	0.862317	0.861774	0.879774	0.884595	0.956888	0.903527	0.0127833	0.028916	0.026923	0.027466	0.009466	0.004645	-0.067648	-0.014287
b1344	ttcA	b1179	ycgL	0.980426	1.16188	1.08418	0.980426	1.1423	1.13913	1.14021	1.02833	1.01649	1.03552	1.02271	0.103756	-0.058118	-0.054948	-0.056028	0.055847	0.067688	0.048666	0.061472
b1913	uvrC	b1344	ttcA	1.0061	0.996866	1.0848	0.996866	1.00297	1.00295	1.00295	0.956137	0.952247	1.01544	0.988589	0.0879301	0.081826	0.081846	0.081846	0.128659	0.132549	0.069359	0.096207
b4415	hokE	b3361	fic	0.998871	1.02248	0.921424	0.998871	1.02135	1.02133	1.02134	0.96547	0.960576	1.02016	0.996265	-0.0774473	-0.099926	-0.099906	-0.099916	-0.044046	-0.039152	-0.09874	-0.074841
b4347	symE	b0839	dacC	0.964148	0.942571	0.932936	0.942571	0.906718	0.908777	0.908192	0.903249	0.905555	0.987991	0.939605	-0.00963456	0.026218	0.024159	0.024744	0.029687	0.027381	-0.055055	-0.006669
b1360	ydaV	b2112	yehE	0.974938	1.03109	0.970114	0.974938	1.00602	1.00524	1.00548	0.956175	0.952471	1.01897	0.988345	-0.00482355	-0.035906	-0.035126	-0.035366	0.013939	0.017643	-0.048856	-0.018231
b1195	ymgE	b2230	yfaA	0.983062	1.05401	0.968094	0.983062	1.03708	1.03616	1.03645	0.972964	0.967325	1.02421	1.00055	-0.0149683	-0.068986	-0.068066	-0.068356	-0.00487	0.000769	-0.056116	-0.032451
b2002	yeeS	b1750	ydjX	0.987206	0.976179	1.06189	0.976179	0.963385	0.963689	0.963599	0.934304	0.932981	1.00647	0.968582	0.0857148	0.098509	0.098205	0.098295	0.12759	0.128913	0.055421	0.093312
b4351	mrr	b0228	rayT	1.00148	0.904247	0.996906	0.904247	0.905729	0.905587	0.905627	0.904614	0.906538	0.980092	0.932073	0.0926591	0.091177	0.091319	0.091279	0.092292	0.090368	0.016814	0.064833
b0711	ybgJ	b1731	cedA	0.981481	0.996293	0.990963	0.981481	0.977775	0.977843	0.977823	0.941605	0.939497	1.01144	0.976034	0.00948166	0.013188	0.01312	0.01314	0.049358	0.051466	-0.020482	0.014929
b4167	yjeF	b1350	recE	0.980027	0.885036	0.979735	0.885036	0.865062	0.867359	0.86673	0.88208	0.886665	0.961113	0.908076	0.0946992	0.114673	0.112376	0.113005	0.097655	0.09307	0.018622	0.071659
b0081	mraZ	b0687	seqA	0.974165	0.952733	1.04007	0.952733	0.926898	0.928119	0.927766	0.9144	0.915392	0.99509	0.949668	0.0873384	0.113173	0.111952	0.112305	0.125671	0.124679	0.044981	0.090403
b3043	ygiL	b4044	dinF	0.966964	0.980654	0.940804	0.966964	0.947619	0.948258	0.94807	0.924965	0.924815	1.00394	0.961916	-0.0261604	-0.006815	-0.007454	-0.007266	0.015839	0.015989	-0.063139	-0.021112
b0396	araJ	b1983	yeeN	0.987742	0.960314	0.988464	0.960314	0.948056	0.948543	0.948399	0.926246	0.925825	1.00118	0.960177	0.0281503	0.040408	0.039921	0.040065	0.062218	0.062639	-0.012712	0.028287
b2576	srmB	b1195	ymgE	0.962051	0.954794	1.04333	0.954794	0.916846	0.918561	0.918069	0.908485	0.910215	0.992901	0.94594	0.0885396	0.126488	0.124773	0.125265	0.134849	0.133119	0.050433	0.097394
b3780	rhlB	b1183	umuD	0.975475	0.933695	1.02159	0.933695	0.90917	0.910796	0.910333	0.905115	0.907141	0.987013	0.938803	0.0878977	0.112423	0.110797	0.11126	0.116478	0.114452	0.03458	0.08279
b1087	yceF	b3034	nudF	0.995096	1.00717	1.03591	0.995096	1.00227	1.00223	1.00224	0.955211	0.951492	1.01632	0.987683	0.0408099	0.033636	0.033676	0.033666	0.080695	0.084414	0.019583	0.048223
b2565	recO	b2900	yqfB	0.988384	1.05329	1.03211	0.988384	1.04168	1.04106	1.04125	0.975661	0.969686	1.02462	1.00282	0.0437274	-0.009569	-0.008949	-0.009139	0.05645	0.062425	0.007494	0.029295
b1184	umuC	b2467	nudK	0.978842	0.961918	1.03701	0.961918	0.940761	0.941566	0.94133	0.921948	0.922064	0.999799	0.956948	0.0750958	0.096253	0.095448	0.095684	0.115066	0.11495	0.037215	0.080066
b2824	ygdB	b1560	ydfU	0.988003	0.968556	0.950853	0.968556	0.956559	0.956936	0.956825	0.930744	0.929816	1.00412	0.964875	-0.0177033	-0.005706	-0.006083	-0.005972	0.020109	0.021037	-0.053269	-0.014022
b1864	yebC	b3996	nudC	0.984056	1.14977	1.05996	0.984056	1.13382	1.13143	1.13224	1.02405	1.01266	1.03486	1.02306	0.0759001	-0.073864	-0.071474	-0.072284	0.035911	0.047292	0.025091	0.036901
b1756	ynjD	b0178	skp	0.974681	0.94909	1.00897	0.94909	0.923772	0.925061	0.924689	0.912777	0.913948	0.9937	0.947765	0.0598848	0.085203	0.083914	0.084286	0.096198	0.095027	0.015275	0.06121
b1913	uvrC	b3937	yiiX	1.0061	0.963047	0.978933	0.963047	0.969147	0.968921	0.968989	0.938299	0.936411	1.0059	0.971121	0.0158861	0.009786	0.010012	0.009944	0.040634	0.042522	-0.026963	0.007812
b3390	aroK	b4058	uvrA	0.983533	0.94974	1.02746	0.94974	0.933274	0.934101	0.933861	0.918236	0.91874	0.996162	0.952101	0.0777195	0.094186	0.093359	0.093599	0.109224	0.10872	0.031298	0.075359
b1810	yoaC	b0876	ybjD	0.989063	1.02303	0.984925	0.989063	1.01209	1.01184	1.01192	0.96009	0.95586	1.01906	0.991623	-0.00413839	-0.027165	-0.026915	-0.026995	0.024835	0.029065	-0.034134	-0.006698
b1060	bssS	b0544	ybcK	0.980768	1.00762	1.00974	0.980768	0.988388	0.988241	0.988286	0.947167	0.944439	1.01433	0.980997	0.0289731	0.021353	0.0215	0.021455	0.062574	0.065302	-0.004592	0.028744
b3740	rsmG	b4058	uvrA	0.981828	0.94974	0.922415	0.94974	0.931569	0.932482	0.932217	0.917251	0.917875	0.995748	0.951316	-0.0273255	-0.009154	-0.010067	-0.009802	0.005164	0.00454	-0.073333	-0.028901
b4438	cyaR	b4174	hflK	0.976804	0.979518	1.073	0.976804	0.956322	0.956797	0.956656	0.930053	0.929271	1.00554	0.965532	0.096199	0.116681	0.116206	0.116347	0.14295	0.143732	0.067468	0.107471
b1863	ruvC	b1633	nth	0.963871	1.06431	0.976143	0.963871	1.02818	1.02586	1.02658	0.967302	0.962416	1.02401	0.995413	0.0122723	-0.052037	-0.049717	-0.050437	0.008841	0.013727	-0.047863	-0.01927
b2961	mutY	b3263	yhdU	0.978816	0.919396	1.01267	0.919396	0.898212	0.899919	0.899438	0.899504	0.90214	0.980901	0.93115	0.0932712	0.114455	0.112748	0.113229	0.113163	0.110527	0.031766	0.081517
b4509	ylcG	b2823	ppdC	0.976895	0.990092	0.965423	0.976895	0.966987	0.967216	0.967147	0.935683	0.934268	1.00886	0.970931	-0.0114716	-0.001564	-0.001793	-0.001724	0.02974	0.031155	-0.04344	-0.005508
b4058	uvrA	b3743	asnC	0.98829	0.951159	0.989606	0.951159	0.939449	0.940021	0.939854	0.921734	0.921816	0.997856	0.955182	0.0384471	0.050157	0.049585	0.049752	0.067872	0.06779	-0.00825	0.034424
b0252	yafZ	b2676	nrdF	1.00775	1.01846	0.993435	1.00775	1.02621	1.02636	1.02631	0.968482	0.963195	1.02043	0.999203	-0.0143143	-0.032775	-0.032925	-0.032875	0.024953	0.03024	-0.026992	-0.005768
b0799	dinG	b1750	ydjX	0.997029	0.976179	1.05654	0.976179	0.973209	0.973279	0.973258	0.939983	0.937962	1.00831	0.973448	0.0803588	0.083329	0.083259	0.08328	0.116555	0.118576	0.048227	0.08309
b1631	rsxG	b0892	rarA	0.987213	1.02612	1.07561	0.987213	1.01333	1.01299	1.0131	0.960648	0.956367	1.01947	0.992008	0.0883964	0.062279	0.062619	0.062509	0.114961	0.119242	0.056135	0.083601
b0543	emrE	b1107	nagZ	0.982429	0.992165	1.03237	0.982429	0.974595	0.974732	0.974691	0.939976	0.938045	1.01044	0.974469	0.0499387	0.057773	0.057636	0.057677	0.092392	0.094323	0.021926	0.057899
b0799	dinG	b0713	ybgL	0.997029	1.03644	1.02616	0.997029	1.03347	1.03336	1.0334	0.97177	0.966179	1.02262	1.00092	0.0291285	-0.007312	-0.007202	-0.007242	0.054388	0.059979	0.003539	0.025235
b3937	yiiX	b2758	casC	0.994266	0.895221	0.940302	0.895221	0.889487	0.890088	0.88992	0.895683	0.898653	0.97271	0.922043	0.0450814	0.050815	0.050214	0.050382	0.044619	0.041649	-0.032408	0.018259
b0681	chiP	b1961	dcm	0.970921	1.10153	1	0.970921	1.07245	1.0695	1.07045	0.99101	0.983419	1.02981	1.00865	0.0290785	-0.07245	-0.0695	-0.07045	0.00899	0.016581	-0.029814	-0.008654
b2823	ppdC	b1442	ydcU	0.988011	0.95849	0.935706	0.95849	0.946501	0.946999	0.946852	0.92544	0.925107	1.00057	0.959274	-0.0227835	-0.010795	-0.011293	-0.011146	0.010266	0.010599	-0.064863	-0.023568
b0437	clpP	b3267	yhdV	0.981067	0.939229	1.01097	0.939229	0.920296	0.921446	0.921116	0.911266	0.912568	0.99109	0.944675	0.0717427	0.090676	0.089526	0.089856	0.099706	0.098404	0.019882	0.066297
b0922	mukF	b1195	ymgE	0.997653	0.954794	0.92525	0.954794	0.952447	0.952553	0.952522	0.929063	0.928264	1.00133	0.961968	-0.0295444	-0.027197	-0.027303	-0.027272	-0.003813	-0.003014	-0.076081	-0.036718
b2961	mutY	b2900	yqfB	0.978816	1.05329	0.989231	0.978816	1.03211	1.03098	1.03134	0.970131	0.964836	1.02366	0.998337	0.0104149	-0.042879	-0.041749	-0.042109	0.0191	0.024395	-0.034429	-0.009106
b4526	ydaE	b1913	uvrC	1.0052	1.0292	1.0384	1.0052	1.03439	1.03455	1.0345	0.972668	0.966927	1.02219	1.00228	0.0332002	0.004007	0.003847	0.003897	0.065729	0.07147	0.016205	0.036122
b1459	yncM	b3937	yiiX	0.96803	0.963047	1	0.963047	0.931077	0.932258	0.931915	0.916294	0.91711	0.99775	0.952947	0.0369531	0.068923	0.067742	0.068085	0.083706	0.08289	0.00225	0.047053
b1460	ydcC	b0892	rarA	0.982487	1.02612	1.01725	0.982487	1.0086	1.00815	1.00829	0.957917	0.953971	1.01888	0.989778	0.0347667	0.008654	0.009104	0.008964	0.059337	0.063283	-0.001622	0.027476
b2009	sbmC	b2509	xseA	0.979665	1.03631	1.0683	0.979665	1.01597	1.01523	1.01546	0.961661	0.957312	1.02062	0.992525	0.0886324	0.052327	0.053067	0.052837	0.106636	0.110985	0.047673	0.075772
b0094	ftsA	b3389	aroB	0.933428	0.890793	0.875494	0.890793	0.824222	0.831492	0.829569	0.858182	0.865736	0.945359	0.897043	-0.015299	0.051272	0.044002	0.045925	0.017312	0.009758	-0.069865	-0.021549
b0262	afuC	b3043	ygiL	0.978728	0.967027	0.996589	0.967027	0.945755	0.946456	0.94625	0.924577	0.924398	1.00165	0.959726	0.0295619	0.050834	0.050133	0.050339	0.072012	0.072191	-0.005058	0.036863
b1574	dicF	b0910	cmk	0.969612	0.968271	1.02848	0.968271	0.937883	0.938847	0.938566	0.919964	0.920359	1.0001	0.956465	0.060209	0.090597	0.089633	0.089914	0.108516	0.108121	0.028377	0.072015

## Sheet: 5-fold AUC
Table S2. Mean and standard deviation from a 5-fold cross validation of the training dataset (Sheet 4) shown for machine learning models in Fig. 1a.
Machine learning models	Mean and SD	5-fold cross validation
		RMSE	MAE
LR	Mean	0.0915642	0.0723702
	SD	0.00841	0.006728
NN	Mean	0.0898168	0.0716816
	SD	0.019362	0.01877
SVR	Mean	0.0926454	0.0720226
	SD	0.00794	0.006759
GP	Mean	0.06186	0.04928
	SD	0.00416449	0.00363621
Note: Since predefined models are not trained, there are no 5-fold
cross validation-derived means and SDs to report.

## Sheet: Testing parameter values
Table S2. Evaluating the performance of GP and NN models (Sheet 5) under different parameter settings
by measuring error metrics (RMSE, MAE) using the training set.
Machine learning method	Parameter settings	Parameter values	RMSE	MAE
GP	Gamma	0.125	0.0854	0.0655
		0.25	0.0793	0.0612
		0.5	0.0705	0.0542
		1	0.064	0.049
		1.5	0.0622	0.0472
		2	0.0615	0.0463
		2.5	0.0611	0.0457
		3	0.061	0.0455
	Noise	0.125	0.0592	0.044
		0.25	0.0596	0.0442
		0.5	0.0608	0.0461
		1	0.064	0.049
		1.5	0.06072	0.0526
		2	0.0733	0.056
NN (Mutiperceptron)	Learning rate	0	0.0842	0.0652
		0.1	0.0782	0.0592
		0.2	0.0842	0.0652
		0.3	0.0914	0.0716
		0.4	0.0994	0.079
		0.5	0.1072	0.087
	Momentum	0	0.0883	0.0691
		0.1	0.0897	0.0704
		0.2	0.0914	0.0716
		0.3	0.094	0.0733
		0.4	0.0984	0.0763
		0.5	0.1063	0.0819
	Number of hidden layers	HL-a	0.0914	0.0716
		HL-2	0.0891	0.0684
		HL-3	0.0836	0.0636
Note: Highlighted columns contain default parameter values

## Sheet: ReadMe
ReadMe: Column description in Sheets 1-5
Column headers	Remarks
Bnum1	Blattner number corresponding to Gene 1 in the GI pair
Gene1	Gene 1 in the GI pair
Bnum2	Blattner number corresponding to Gene 2 in the GI pair
Gene2	Gene 2 in the GI pair
Observed mutant fitness	Normalized single (Wx, Wy) and double (Wxy) mutants growth fitness measured in the genome integrity (Kumar et al., 2016) genetic screen
Wx	Normalized single mutant fitness of gene x
Wy	Normalized single mutant fitness of gene y
Wxy	Normalized double mutant fitness of gene x and gene y
Expected mutant fitness	Expected double mutant fitness computed based on the observed and normalized single (Wx, Wy) and double (Wxy) mutants growth fitness
Min	Expected double mutant fitness of Wxy measured by "Minimum" definition
Add	Expected double mutant fitness of Wxy measured by "Additive" definition
Multi	Expected double mutant fitness of Wxy measured by "Multiplicative" definition
Log	Expected double mutant fitness of Wxy measured by "Lograthemic" definition
LR	Expected double mutant fitness of Wxy measured by "Linear regression"definition
SVR	Expected double mutant fitness of Wxy measured by "Suport vector regression" definition
NN	Expected double mutant fitness of Wxy measured by "Neural network" definition
GP	Expected double mutant fitness of Wxy measured by "Gaussian Process" definition
GI score (ε; observed-expected)	Genetic interaction score measured based on the observed - expected double mutant growth fitness
εMin	Genetic interaction score measured by "Minimum" definition based on the observed - expected double mutant growth fitness
εAdd	Genetic interaction score measured by "Additive" definition based on the observed - expected double mutant growth fitness
εMulti	Genetic interaction score measured by "Multiplicative" definition based on the observed - expected double mutant growth fitness
εLog	Genetic interaction score measured by "Lograthemic" definition based on the observed - expected double mutant growth fitness
εLR	Genetic interaction score measured by "Linear regression" definition based on the observed - expected double mutant growth fitness
εSVR	Genetic interaction score measured by "Suport vector regression" definition based on the observed - expected double mutant growth fitness
εNN	Genetic interaction score measured by "Neural network" definition based on the observed - expected double mutant growth fitness
εGP	Genetic interaction score measured by "Gaussian Process" definition based on the observed - expected double mutant growth fitness
RMSE	Root mean square error
MAE	Mean absolute error
SD	Standard deviation
