# Supplementary material for: A Gaussian process-based definition reveals new and bona fide genetic interactions compared to a multiplicative model in the Gram-negative Escherichia coli
Source: Oxford University Press journal article supplement (doi:10.1093/bioinformatics/btz673), 2019-08-23
Supplement: bioinformatics_36_3_880_s3.zip [file bioinformatics_36_3_880_s3.zip › Table S4-July 15-2019-Finalized.xlsx]

## Sheet: 25 pairs
Table S4. Multiplicative model misclassifies 21 alleviating interactions as non-interacting, 2 non-interacting as alleviating, and 2 alleviating as aggravating or non-interacting
based on a decision-tree classification score threshold (Sheet 1)
Bnum1	Gene1	Bnum2	Gene2	Observed mutant fitness			GI score (ε; Observed-Expected mutant fitness)		Actual class*	Predicted class
				Wx	Wy	Wxy	εMulti	εGP
b0632	dacA	b1238	tdk	0.927222	1.32983	1.24098	0.00793192	0.249244	O	+
b3933	ftsN	b3281	aroE	0.948462	0.827383	0.910367	0.125626	0.057004	+	O
b4000	hupA	b1238	tdk	0.916472	1.32983	1.20439	-0.0143608	0.216636	O	+
b0190	yaeQ	b3813	uvrD	0.962066	1.34034	1.25121	-0.0382884	0.247896	O	+
b4000	hupA	b3813	uvrD	0.916472	1.34034	1.35035	0.121958	0.364426	O	+
b4206	ytfB	b3813	uvrD	0.964906	1.34034	1.24825	-0.0450486	0.243813	O	+
b3384	trpS	b3813	uvrD	0.979253	1.34034	1.2145	-0.0980361	0.204292	O	+
b3191	mlaB	b3813	uvrD	0.928878	1.34034	1.33822	0.0932139	0.347725	O	+
b0760	modF	b1238	tdk	0.883252	1.32983	1.20625	0.0316828	0.230133	O	+
b0760	modF	b3813	uvrD	0.883252	1.34034	1.29209	0.108232	0.317731	O	+
b1545	pinQ	b3813	uvrD	0.935733	1.34034	1.21412	-0.0400801	0.221039	O	+
b2699	recA	b3813	uvrD	0.925962	1.34034	1.30907	0.067959	0.319658	O	+
b2819	recD	b3813	uvrD	0.938708	1.34034	1.21525	-0.0429441	0.221033	O	+
b4203	rplI	b3813	uvrD	0.917563	1.34034	1.22941	-0.000441799	0.243089	O	+
b1860	ruvB	b3813	uvrD	0.937562	1.34034	1.33301	0.0763632	0.339237	O	+
b4451	ryhB	b3813	uvrD	0.909768	1.34034	1.26742	0.0480217	0.283918	O	+
b1916	sdiA	b0437	clpP	0.946157	0.730005	1.93883	1.24814	1.1689	+	-
b4062	soxS	b1861	ruvA	0.963168	0.817814	0.402934	-0.384758	-0.446649	O	-
b2576	srmB	b1195	ymgE	0.962051	0.954794	1.04333	0.124773	0.097394	+	O
b4469	ygiQ	b1238	tdk	0.920237	1.32983	1.22009	-0.00367422	0.230948	O	+
b1574	dicF	b3813	uvrD	0.969612	1.34034	1.26634	-0.0332678	0.260022	O	+
b3248	yhdE	b2890	lysS	0.941797	1.36618	1.30779	0.0211172	0.317519	O	+
b4469	ygiQ	b3813	uvrD	0.920237	1.34034	1.34608	0.112655	0.358788	O	+
b3068	mug	b3813	uvrD	0.988112	1.34034	1.20028	-0.12413	0.18647	O	+
b3095	yqjA	b3813	uvrD	0.939631	1.34034	1.33126	0.0718252	0.336689	O	+
Notes:
O, neutral
+, alleviating
-, aggravating

## Sheet: Accuracy and Error
Table S4. Accuracy and error of the GI definitions estimated based on a 5-fold cross validation on 104,022 gene
pairs compiled from the genome integrity study (Kumar et al., 2016; Sheet 2).
Model (or defnition) tested	Gene pair labels based on interaction type	Accuracy (%); pairs correctly classified	Error (%); pairs incorrectly classified
GP	Interacting (Aggravating, Alleviating)	93; 8,816	7.0; 662
	Non-interacting	99.1; 73,770	0.9; 690
Multiplicative	Interacting (Aggravating, Alleviating)	85.5; 8,108	14.5; 1,370
	Non-interacting	95.0; 70,708	5.0; 3,752
Note: After applying the test data selection criteria on all 104,022 GI pairs (using a different randomly selected set of
800 test gene pairs), we were able retain only 74,460 non-interacting and 9,478 interacting gene pairs. Remaining
20,084 gene pairs did not meet the selection criteria and hence were not considered in the analysis.

## Sheet: AUC
Table S4. Area under the receiver operating characteristic curve for the interacting and non-interacting test pairs predicted under GP and
multiplicative definitions based on the decision-tree classification system (Sheet 3)
Model (or defnition) tested	Gene pair labels based on interaction type	Accuracy (%); pairs correctly classified	Error (%); pairs incorrectly classified	Area under the receiver operating characteristic curve
GP	a = + (alleviating)	99	1	0.997
	b = - (aggravating)	100	0	0.994
	c = O (non-interacting)	99.8	0.2	0.998
	Weighted Average	99.6	0.4	0.996333
Multiplicative	a = + (alleviating)	98.4	1.6	0.955
	b = - (aggravating)	100	0	0.994
	c = O (non-interacting)	94.8	5.2	0.966
	Weighted Average	97.7333	2.26667	0.971667

## Sheet: ReadMe
ReadMe: Column description in Sheets 1-3
Column headers	Remarks
Bnum1	Blattner number corresponding to Gene 1 in the GI pair
Gene1	Gene 1 in the GI pair
Bnum2	Blattner number corresponding to Gene 2 in the GI pair
Gene2	Gene 2 in the GI pair
Observed mutant fitness	Normalized single (Wx, Wy) and double (Wxy) mutants growth fitness measured in the genome integrity (Kumar et al., 2016) genetic screen
Wx	Normalized single mutant fitness of gene x
Wy	Normalized single mutant fitness of gene y
Wxy	Normalized double mutant fitness of gene x and gene y
GI score (ε; observed-expected)	Genetic interaction score measured based on the observed - expected double mutant growth fitness
εMulti	Genetic interaction score measured based on the observed - expected double mutant growth fitness using multiplicative defnition
εGP	Genetic interaction score measured based on the observed - expected double mutant growth fitness using Gaussian process defnition
Acutal class	Gene pairs assigned to a specific GI type as per the genome integrity study (Kumar et al., 2016)
Predicted class	GI type assigned or predicted based on the decision tree classification system
Model (or defnition) tested	Definitions tested to measure GIs
Gene pair labels based on interaction type	Gene pairs labeled as interacting or non-interacting
Precision (%); pairs correctly classified	Gene pairs classified correctly to a specific interaction type as expected
Recall (%); pairs incorrectly classified	Gene pairs classified incorrectly and not in agreement with the expected interaction type
Area under the receiver operating characteristic curve	AUC for interacting and non-interacting test pairs computed under each definition using a 5-fold cross-validation
