# Supplementary material for: A Gaussian process-based definition reveals new and bona fide genetic interactions compared to a multiplicative model in the Gram-negative Escherichia coli
Source: Oxford University Press journal article supplement (doi:10.1093/bioinformatics/btz673), 2019-08-23
Supplement: bioinformatics_36_3_880_s3.zip [file bioinformatics_36_3_880_s3.zip › Table S5-July 15-2019-Finalized.xlsx]

## Sheet: Enriched_GP_pairs_ecoli_go_all_
Table S4. GI pairs sharing a similar enriched gene ontology (GO) annotation
Category*	Gene1	Gene2	GO annotation	Normalized GSEA enrichment score	P-value	False discovery rate (FDR)
B	ada	groS	GO:0005515	1.78517	0.0223881	0.210774
B	aidB	bamA	GO:0005515	1.78517	0.0223881	0.210774
B	aidB	dnaK	GO:0005515	1.78517	0.0223881	0.210774
B	aidB	ftsK	GO:0005515	1.78517	0.0223881	0.210774
B	aidB	mukB	GO:0005515	1.78517	0.0223881	0.210774
B	aidB	murC	GO:0005515	1.78517	0.0223881	0.210774
B	aidB	murE	GO:0005515	1.78517	0.0223881	0.210774
B	aidB	nrdA	GO:0005515	1.78517	0.0223881	0.210774
B	aidB	yqgF	GO:0005515	1.78517	0.0223881	0.210774
B	alkB	mukF	GO:0005515	1.78517	0.0223881	0.210774
B	alkB	nrdB	GO:0005515	1.78517	0.0223881	0.210774
B	aroB	fic	GO:0005515	1.78517	0.0223881	0.210774
B	aroB	recJ	GO:0005515	1.78517	0.0223881	0.210774
B	aroB	rpe	GO:0005515	1.78517	0.0223881	0.210774
B	aroB	seqA	GO:0005515	1.78517	0.0223881	0.210774
B	asnC	hfq	GO:0005515	1.78517	0.0223881	0.210774
B	asnC	murC	GO:0005515	1.78517	0.0223881	0.210774
B	asnC	obgE	GO:0005515	1.78517	0.0223881	0.210774
B	asnC	recB	GO:0005515	1.78517	0.0223881	0.210774
B	atl	ftsN	GO:0005515	1.78517	0.0223881	0.210774
B	atl	mnmG	GO:0005515	1.78517	0.0223881	0.210774
B	atl	tag	GO:0005515	1.78517	0.0223881	0.210774
B	atl	yjeF	GO:0005515	1.78517	0.0223881	0.210774
B	bamA	bolA	GO:0005515	1.78517	0.0223881	0.210774
B	bamA	dnaG	GO:0005515	1.78517	0.0223881	0.210774
B	bolA	ftsL	GO:0005515	1.78517	0.0223881	0.210774
B	bolA	parE	GO:0005515	1.78517	0.0223881	0.210774
B	bolA	recA	GO:0005515	1.78517	0.0223881	0.210774
B	bolA	recB	GO:0005515	1.78517	0.0223881	0.210774
B	casA	ftsN	GO:0005515	1.78517	0.0223881	0.210774
B	casA	minE	GO:0005515	1.78517	0.0223881	0.210774
B	casA	parE	GO:0005515	1.78517	0.0223881	0.210774
B	casC	slmA	GO:0005515	1.78517	0.0223881	0.210774
B	casC	spoT	GO:0005515	1.78517	0.0223881	0.210774
B	casC	tatB	GO:0005515	1.78517	0.0223881	0.210774
B	casC	xerC	GO:0005515	1.78517	0.0223881	0.210774
B	casE	groS	GO:0005515	1.78517	0.0223881	0.210774
B	casE	grpE	GO:0005515	1.78517	0.0223881	0.210774
B	casE	recC	GO:0005515	1.78517	0.0223881	0.210774
B	casE	spoT	GO:0005515	1.78517	0.0223881	0.210774
B	casE	topA	GO:0005515	1.78517	0.0223881	0.210774
B	clpP	mutH	GO:0005515	1.78517	0.0223881	0.210774
B	clpP	recX	GO:0005515	1.78517	0.0223881	0.210774
B	clpP	tatB	GO:0005515	1.78517	0.0223881	0.210774
B	clpX	grpE	GO:0005515	1.78517	0.0223881	0.210774
B	clpX	topB	GO:0005515	1.78517	0.0223881	0.210774
B	clpX	vsr	GO:0005515	1.78517	0.0223881	0.210774
B	cspD	recB	GO:0005515	1.78517	0.0223881	0.210774
B	cspD	rpsF	GO:0005515	1.78517	0.0223881	0.210774
B	cyaY	paoB	GO:0005515	1.78517	0.0223881	0.210774
B	cyaY	recJ	GO:0005515	1.78517	0.0223881	0.210774
B	cyaY	topB	GO:0005515	1.78517	0.0223881	0.210774
B	dacB	groS	GO:0005515	1.78517	0.0223881	0.210774
B	dacB	hfq	GO:0005515	1.78517	0.0223881	0.210774
B	dacB	nlpI	GO:0005515	1.78517	0.0223881	0.210774
B	dacB	sbcD	GO:0005515	1.78517	0.0223881	0.210774
B	dacB	srmB	GO:0005515	1.78517	0.0223881	0.210774
B	dam	fis	GO:0005515	1.78517	0.0223881	0.210774
B	dam	hfq	GO:0005515	1.78517	0.0223881	0.210774
B	dam	minC	GO:0005515	1.78517	0.0223881	0.210774
B	dam	nlpI	GO:0005515	1.78517	0.0223881	0.210774
B	dcm	groS	GO:0005515	1.78517	0.0223881	0.210774
B	dcm	hfq	GO:0005515	1.78517	0.0223881	0.210774
B	dcm	nlpI	GO:0005515	1.78517	0.0223881	0.210774
B	diaA	hfq	GO:0005515	1.78517	0.0223881	0.210774
B	dinJ	lpoA	GO:0005515	1.78517	0.0223881	0.210774
B	dinJ	nlpI	GO:0005515	1.78517	0.0223881	0.210774
B	dnaA	groS	GO:0005515	1.78517	0.0223881	0.210774
B	dnaA	gyrB	GO:0005515	1.78517	0.0223881	0.210774
B	dnaA	nrdA	GO:0005515	1.78517	0.0223881	0.210774
B	dnaA	recB	GO:0005515	1.78517	0.0223881	0.210774
B	dnaA	rpoD	GO:0005515	1.78517	0.0223881	0.210774
B	dnaE	dnaQ	GO:0005515	1.78517	0.0223881	0.210774
B	dnaE	ftsK	GO:0005515	1.78517	0.0223881	0.210774
B	dnaE	relE	GO:0005515	1.78517	0.0223881	0.210774
B	dnaE	ychN	GO:0005515	1.78517	0.0223881	0.210774
B	dnaE	zapA	GO:0005515	1.78517	0.0223881	0.210774
B	dnaG	pheS	GO:0005515	1.78517	0.0223881	0.210774
B	dnaG	priC	GO:0005515	1.78517	0.0223881	0.210774
B	dnaG	rsmD	GO:0005515	1.78517	0.0223881	0.210774
B	dnaG	yhbU	GO:0005515	1.78517	0.0223881	0.210774
B	dnaJ	holB	GO:0005515	1.78517	0.0223881	0.210774
B	dnaJ	mcrB	GO:0005515	1.78517	0.0223881	0.210774
B	dnaK	ispA	GO:0005515	1.78517	0.0223881	0.210774
B	dnaK	topA	GO:0005515	1.78517	0.0223881	0.210774
B	dnaN	dnaX	GO:0005515	1.78517	0.0223881	0.210774
B	dnaN	ftsX	GO:0005515	1.78517	0.0223881	0.210774
B	dnaN	groS	GO:0005515	1.78517	0.0223881	0.210774
B	dnaN	lpoA	GO:0005515	1.78517	0.0223881	0.210774
B	dnaN	nrdA	GO:0005515	1.78517	0.0223881	0.210774
B	dnaN	ruvA	GO:0005515	1.78517	0.0223881	0.210774
B	dnaQ	hfq	GO:0005515	1.78517	0.0223881	0.210774
B	dnaQ	minC	GO:0005515	1.78517	0.0223881	0.210774
B	dnaQ	priA	GO:0005515	1.78517	0.0223881	0.210774
B	dnaX	gyrA	GO:0005515	1.78517	0.0223881	0.210774
B	dnaX	holA	GO:0005515	1.78517	0.0223881	0.210774
B	dnaX	tag	GO:0005515	1.78517	0.0223881	0.210774
B	envC	holB	GO:0005515	1.78517	0.0223881	0.210774
B	era	fis	GO:0005515	1.78517	0.0223881	0.210774
B	fau	obgE	GO:0005515	1.78517	0.0223881	0.210774
B	fau	recC	GO:0005515	1.78517	0.0223881	0.210774
B	fetA	groS	GO:0005515	1.78517	0.0223881	0.210774
B	fetA	hfq	GO:0005515	1.78517	0.0223881	0.210774
B	fetA	recB	GO:0005515	1.78517	0.0223881	0.210774
B	fic	hfq	GO:0005515	1.78517	0.0223881	0.210774
B	fic	recB	GO:0005515	1.78517	0.0223881	0.210774
B	fis	tig	GO:0005515	1.78517	0.0223881	0.210774
B	ftsA	ftsZ	GO:0005515	1.78517	0.0223881	0.210774
B	ftsA	groL	GO:0005515	1.78517	0.0223881	0.210774
B	ftsA	nlpI	GO:0005515	1.78517	0.0223881	0.210774
B	ftsA	nrdA	GO:0005515	1.78517	0.0223881	0.210774
B	ftsA	obgE	GO:0005515	1.78517	0.0223881	0.210774
B	ftsA	parE	GO:0005515	1.78517	0.0223881	0.210774
B	ftsA	ruvA	GO:0005515	1.78517	0.0223881	0.210774
B	ftsA	ydaW	GO:0005515	1.78517	0.0223881	0.210774
B	ftsH	recX	GO:0005515	1.78517	0.0223881	0.210774
B	ftsH	relE	GO:0005515	1.78517	0.0223881	0.210774
B	ftsH	sbcD	GO:0005515	1.78517	0.0223881	0.210774
B	ftsK	mreB	GO:0005515	1.78517	0.0223881	0.210774
B	ftsK	umuD	GO:0005515	1.78517	0.0223881	0.210774
B	ftsL	mnmG	GO:0005515	1.78517	0.0223881	0.210774
B	ftsL	nlpI	GO:0005515	1.78517	0.0223881	0.210774
B	ftsL	sbcB	GO:0005515	1.78517	0.0223881	0.210774
B	ftsL	yebV	GO:0005515	1.78517	0.0223881	0.210774
B	ftsN	groS	GO:0005515	1.78517	0.0223881	0.210774
B	ftsN	minD	GO:0005515	1.78517	0.0223881	0.210774
B	ftsN	nrdF	GO:0005515	1.78517	0.0223881	0.210774
B	ftsN	rng	GO:0005515	1.78517	0.0223881	0.210774
B	ftsN	rppH	GO:0005515	1.78517	0.0223881	0.210774
B	ftsN	sbcB	GO:0005515	1.78517	0.0223881	0.210774
B	ftsN	srmB	GO:0005515	1.78517	0.0223881	0.210774
B	ftsN	topA	GO:0005515	1.78517	0.0223881	0.210774
B	ftsP	minC	GO:0005515	1.78517	0.0223881	0.210774
B	ftsQ	ftsX	GO:0005515	1.78517	0.0223881	0.210774
B	ftsQ	murE	GO:0005515	1.78517	0.0223881	0.210774
B	ftsQ	yebV	GO:0005515	1.78517	0.0223881	0.210774
B	ftsW	srmB	GO:0005515	1.78517	0.0223881	0.210774
B	ftsY	yhhA	GO:0005515	1.78517	0.0223881	0.210774
B	ftsZ	minC	GO:0005515	1.78517	0.0223881	0.210774
B	groL	mutT	GO:0005515	1.78517	0.0223881	0.210774
B	groL	yhfG	GO:0005515	1.78517	0.0223881	0.210774
B	groS	gyrB	GO:0005515	1.78517	0.0223881	0.210774
B	groS	hfq	GO:0005515	1.78517	0.0223881	0.210774
B	groS	mukB	GO:0005515	1.78517	0.0223881	0.210774
B	groS	radA	GO:0005515	1.78517	0.0223881	0.210774
B	groS	recX	GO:0005515	1.78517	0.0223881	0.210774
B	groS	rpoD	GO:0005515	1.78517	0.0223881	0.210774
B	groS	yqgF	GO:0005515	1.78517	0.0223881	0.210774
B	grpE	rnt	GO:0005515	1.78517	0.0223881	0.210774
B	gyrB	recB	GO:0005515	1.78517	0.0223881	0.210774
B	gyrB	thyA	GO:0005515	1.78517	0.0223881	0.210774
B	helD	nlpI	GO:0005515	1.78517	0.0223881	0.210774
B	helD	recB	GO:0005515	1.78517	0.0223881	0.210774
B	hflK	topB	GO:0005515	1.78517	0.0223881	0.210774
B	hfq	iraD	GO:0005515	1.78517	0.0223881	0.210774
B	hfq	ligA	GO:0005515	1.78517	0.0223881	0.210774
B	hfq	marR	GO:0005515	1.78517	0.0223881	0.210774
B	hfq	murC	GO:0005515	1.78517	0.0223881	0.210774
B	hfq	rnhA	GO:0005515	1.78517	0.0223881	0.210774
B	hfq	sbcB	GO:0005515	1.78517	0.0223881	0.210774
B	hfq	ychN	GO:0005515	1.78517	0.0223881	0.210774
B	hfq	ydaW	GO:0005515	1.78517	0.0223881	0.210774
B	hfq	yhbQ	GO:0005515	1.78517	0.0223881	0.210774
B	hfq	yjjV	GO:0005515	1.78517	0.0223881	0.210774
B	holA	ruvC	GO:0005515	1.78517	0.0223881	0.210774
B	holA	sbcB	GO:0005515	1.78517	0.0223881	0.210774
B	holB	minC	GO:0005515	1.78517	0.0223881	0.210774
B	holB	recA	GO:0005515	1.78517	0.0223881	0.210774
B	holB	tatB	GO:0005515	1.78517	0.0223881	0.210774
B	holB	zipA	GO:0005515	1.78517	0.0223881	0.210774
B	holC	seqA	GO:0005515	1.78517	0.0223881	0.210774
B	hsdM	pinR	GO:0005515	1.78517	0.0223881	0.210774
B	hsdM	yqgF	GO:0005515	1.78517	0.0223881	0.210774
B	hupB	mukF	GO:0005515	1.78517	0.0223881	0.210774
B	iraD	recB	GO:0005515	1.78517	0.0223881	0.210774
B	ispA	minC	GO:0005515	1.78517	0.0223881	0.210774
B	ispA	mreB	GO:0005515	1.78517	0.0223881	0.210774
B	ispA	rng	GO:0005515	1.78517	0.0223881	0.210774
B	ligA	marA	GO:0005515	1.78517	0.0223881	0.210774
B	ligA	nlpI	GO:0005515	1.78517	0.0223881	0.210774
B	ligA	pheS	GO:0005515	1.78517	0.0223881	0.210774
B	ligA	recB	GO:0005515	1.78517	0.0223881	0.210774
B	ligA	ydaW	GO:0005515	1.78517	0.0223881	0.210774
B	lpoA	marR	GO:0005515	1.78517	0.0223881	0.210774
B	lpoA	relE	GO:0005515	1.78517	0.0223881	0.210774
B	lpoA	srmB	GO:0005515	1.78517	0.0223881	0.210774
B	marA	zapA	GO:0005515	1.78517	0.0223881	0.210774
B	marR	murE	GO:0005515	1.78517	0.0223881	0.210774
B	marR	sbcB	GO:0005515	1.78517	0.0223881	0.210774
B	marR	xerC	GO:0005515	1.78517	0.0223881	0.210774
B	mcrB	tig	GO:0005515	1.78517	0.0223881	0.210774
B	mcrB	topA	GO:0005515	1.78517	0.0223881	0.210774
B	mfd	nth	GO:0005515	1.78517	0.0223881	0.210774
B	mfd	recC	GO:0005515	1.78517	0.0223881	0.210774
B	mfd	rpoD	GO:0005515	1.78517	0.0223881	0.210774
B	mfd	tatB	GO:0005515	1.78517	0.0223881	0.210774
B	mfd	tatC	GO:0005515	1.78517	0.0223881	0.210774
B	mfd	xerC	GO:0005515	1.78517	0.0223881	0.210774
B	minC	ung	GO:0005515	1.78517	0.0223881	0.210774
B	minD	recF	GO:0005515	1.78517	0.0223881	0.210774
B	minD	rppH	GO:0005515	1.78517	0.0223881	0.210774
B	minE	nrdA	GO:0005515	1.78517	0.0223881	0.210774
B	mnmE	murD	GO:0005515	1.78517	0.0223881	0.210774
B	mnmE	uvrA	GO:0005515	1.78517	0.0223881	0.210774
B	mnmG	mutH	GO:0005515	1.78517	0.0223881	0.210774
B	mnmG	radD	GO:0005515	1.78517	0.0223881	0.210774
B	mnmG	rhlB	GO:0005515	1.78517	0.0223881	0.210774
B	mnmG	rpe	GO:0005515	1.78517	0.0223881	0.210774
B	mnmG	seqA	GO:0005515	1.78517	0.0223881	0.210774
B	mreB	murE	GO:0005515	1.78517	0.0223881	0.210774
B	mreB	phr	GO:0005515	1.78517	0.0223881	0.210774
B	mukB	ruvC	GO:0005515	1.78517	0.0223881	0.210774
B	mukB	sbcB	GO:0005515	1.78517	0.0223881	0.210774
B	mukF	nlpI	GO:0005515	1.78517	0.0223881	0.210774
B	mukF	ruvC	GO:0005515	1.78517	0.0223881	0.210774
B	mukF	uvrA	GO:0005515	1.78517	0.0223881	0.210774
B	mukF	ychN	GO:0005515	1.78517	0.0223881	0.210774
B	murC	yqgF	GO:0005515	1.78517	0.0223881	0.210774
B	murD	mutH	GO:0005515	1.78517	0.0223881	0.210774
B	murD	nrdF	GO:0005515	1.78517	0.0223881	0.210774
B	murE	murG	GO:0005515	1.78517	0.0223881	0.210774
B	murE	mutT	GO:0005515	1.78517	0.0223881	0.210774
B	murE	nrdA	GO:0005515	1.78517	0.0223881	0.210774
B	murE	topB	GO:0005515	1.78517	0.0223881	0.210774
B	murG	recX	GO:0005515	1.78517	0.0223881	0.210774
B	mutH	yebV	GO:0005515	1.78517	0.0223881	0.210774
B	mutT	recA	GO:0005515	1.78517	0.0223881	0.210774
B	mutT	ychN	GO:0005515	1.78517	0.0223881	0.210774
B	nlpI	nrdA	GO:0005515	1.78517	0.0223881	0.210774
B	nlpI	obgE	GO:0005515	1.78517	0.0223881	0.210774
B	nlpI	recF	GO:0005515	1.78517	0.0223881	0.210774
B	nlpI	recX	GO:0005515	1.78517	0.0223881	0.210774
B	nlpI	rpoD	GO:0005515	1.78517	0.0223881	0.210774
B	nlpI	sbcB	GO:0005515	1.78517	0.0223881	0.210774
B	nlpI	yccS	GO:0005515	1.78517	0.0223881	0.210774
B	nlpI	yceA	GO:0005515	1.78517	0.0223881	0.210774
B	nlpI	ydaW	GO:0005515	1.78517	0.0223881	0.210774
B	nlpI	yhbQ	GO:0005515	1.78517	0.0223881	0.210774
B	nrdA	srmB	GO:0005515	1.78517	0.0223881	0.210774
B	nrdB	rnt	GO:0005515	1.78517	0.0223881	0.210774
B	nrdB	srmB	GO:0005515	1.78517	0.0223881	0.210774
B	nrdF	srmB	GO:0005515	1.78517	0.0223881	0.210774
B	nrdF	yjeF	GO:0005515	1.78517	0.0223881	0.210774
B	nudG	pheS	GO:0005515	1.78517	0.0223881	0.210774
B	obgE	recG	GO:0005515	1.78517	0.0223881	0.210774
B	obgE	rplI	GO:0005515	1.78517	0.0223881	0.210774
B	paoB	xseB	GO:0005515	1.78517	0.0223881	0.210774
B	parE	topA	GO:0005515	1.78517	0.0223881	0.210774
B	pheS	radA	GO:0005515	1.78517	0.0223881	0.210774
B	pheS	umuC	GO:0005515	1.78517	0.0223881	0.210774
B	phr	recB	GO:0005515	1.78517	0.0223881	0.210774
B	pinR	recA	GO:0005515	1.78517	0.0223881	0.210774
B	pinR	recG	GO:0005515	1.78517	0.0223881	0.210774
B	pinR	xerC	GO:0005515	1.78517	0.0223881	0.210774
B	priA	recB	GO:0005515	1.78517	0.0223881	0.210774
B	recA	recC	GO:0005515	1.78517	0.0223881	0.210774
B	recA	slmA	GO:0005515	1.78517	0.0223881	0.210774
B	recA	topA	GO:0005515	1.78517	0.0223881	0.210774
B	recA	xerC	GO:0005515	1.78517	0.0223881	0.210774
B	recB	relB	GO:0005515	1.78517	0.0223881	0.210774
B	recB	rnt	GO:0005515	1.78517	0.0223881	0.210774
B	recB	tatB	GO:0005515	1.78517	0.0223881	0.210774
B	recB	thyA	GO:0005515	1.78517	0.0223881	0.210774
B	recB	umuC	GO:0005515	1.78517	0.0223881	0.210774
B	recB	umuD	GO:0005515	1.78517	0.0223881	0.210774
B	recB	vsr	GO:0005515	1.78517	0.0223881	0.210774
B	recB	yceA	GO:0005515	1.78517	0.0223881	0.210774
B	recB	yjjV	GO:0005515	1.78517	0.0223881	0.210774
B	recC	recF	GO:0005515	1.78517	0.0223881	0.210774
B	recC	relE	GO:0005515	1.78517	0.0223881	0.210774
B	recC	rpoD	GO:0005515	1.78517	0.0223881	0.210774
B	recC	rpoZ	GO:0005515	1.78517	0.0223881	0.210774
B	recC	tatB	GO:0005515	1.78517	0.0223881	0.210774
B	recG	ruvA	GO:0005515	1.78517	0.0223881	0.210774
B	recG	srmB	GO:0005515	1.78517	0.0223881	0.210774
B	recJ	rsmD	GO:0005515	1.78517	0.0223881	0.210774
B	recR	ruvA	GO:0005515	1.78517	0.0223881	0.210774
B	recX	sbcD	GO:0005515	1.78517	0.0223881	0.210774
B	relE	xerC	GO:0005515	1.78517	0.0223881	0.210774
B	rep	srmB	GO:0005515	1.78517	0.0223881	0.210774
B	rlmL	sbcD	GO:0005515	1.78517	0.0223881	0.210774
B	rnt	sbcD	GO:0005515	1.78517	0.0223881	0.210774
B	rpe	rpoD	GO:0005515	1.78517	0.0223881	0.210774
B	rpe	rpsF	GO:0005515	1.78517	0.0223881	0.210774
B	rpe	thyA	GO:0005515	1.78517	0.0223881	0.210774
B	rpe	uvrA	GO:0005515	1.78517	0.0223881	0.210774
B	rpoD	srmB	GO:0005515	1.78517	0.0223881	0.210774
B	rpoD	xerC	GO:0005515	1.78517	0.0223881	0.210774
B	rpoZ	slmA	GO:0005515	1.78517	0.0223881	0.210774
B	rpoZ	topA	GO:0005515	1.78517	0.0223881	0.210774
B	rpoZ	zapA	GO:0005515	1.78517	0.0223881	0.210774
B	ruvA	ychN	GO:0005515	1.78517	0.0223881	0.210774
B	ruvC	yoaA	GO:0005515	1.78517	0.0223881	0.210774
B	sbcD	umuD	GO:0005515	1.78517	0.0223881	0.210774
B	skp	topB	GO:0005515	1.78517	0.0223881	0.210774
B	srmB	tatC	GO:0005515	1.78517	0.0223881	0.210774
B	srmB	topB	GO:0005515	1.78517	0.0223881	0.210774
B	srmB	ung	GO:0005515	1.78517	0.0223881	0.210774
B	srmB	ybcN	GO:0005515	1.78517	0.0223881	0.210774
B	srmB	yhhA	GO:0005515	1.78517	0.0223881	0.210774
B	srmB	yjeF	GO:0005515	1.78517	0.0223881	0.210774
B	srmB	yjjV	GO:0005515	1.78517	0.0223881	0.210774
B	tig	ung	GO:0005515	1.78517	0.0223881	0.210774
B	tig	yoaA	GO:0005515	1.78517	0.0223881	0.210774
B	tig	yqgF	GO:0005515	1.78517	0.0223881	0.210774
B	tsaE	ybcN	GO:0005515	1.78517	0.0223881	0.210774
B	umuC	ung	GO:0005515	1.78517	0.0223881	0.210774
B	uvrA	ybcN	GO:0005515	1.78517	0.0223881	0.210774
B	ychN	yebV	GO:0005515	1.78517	0.0223881	0.210774
B	yebV	zapA	GO:0005515	1.78517	0.0223881	0.210774
B	dam	fis	GO:0009314	1.87774	0.00907716	0.159334
B	dam	fis	GO:0009314	1.87774	0.00907716	0.159334
B	dam	minC	GO:0009314	1.87774	0.00907716	0.159334
B	dam	nlpI	GO:0009314	1.87774	0.00907716	0.159334
B	ftsA	ftsZ	GO:0009314	1.87774	0.00907716	0.159334
B	ftsA	groL	GO:0009314	1.87774	0.00907716	0.159334
B	ftsA	nlpI	GO:0009314	1.87774	0.00907716	0.159334
B	ftsA	ruvA	GO:0009314	1.87774	0.00907716	0.159334
B	ftsN	minD	GO:0009314	1.87774	0.00907716	0.159334
B	ftsP	minC	GO:0009314	1.87774	0.00907716	0.159334
B	ftsQ	ftsX	GO:0009314	1.87774	0.00907716	0.159334
B	ftsZ	minC	GO:0009314	1.87774	0.00907716	0.159334
B	holC	seqA	GO:0009314	1.87774	0.00907716	0.159334
B	holC	seqA	GO:0009314	1.87774	0.00907716	0.159334
B	minD	recF	GO:0009314	1.87774	0.00907716	0.159334
B	mnmG	radD	GO:0009314	1.87774	0.00907716	0.159334
B	mnmG	radD	GO:0009314	1.87774	0.00907716	0.159334
B	mnmG	seqA	GO:0009314	1.87774	0.00907716	0.159334
B	mnmG	seqA	GO:0009314	1.87774	0.00907716	0.159334
B	mukB	ruvC	GO:0009314	1.87774	0.00907716	0.159334
B	nlpI	recF	GO:0009314	1.87774	0.00907716	0.159334
B	recA	recC	GO:0009314	1.87774	0.00907716	0.159334
B	recA	recC	GO:0009314	1.87774	0.00907716	0.159334
B	recB	thyA	GO:0009314	1.87774	0.00907716	0.159334
B	recB	thyA	GO:0009314	1.87774	0.00907716	0.159334
B	recC	recF	GO:0009314	1.87774	0.00907716	0.159334
B	recC	recF	GO:0009314	1.87774	0.00907716	0.159334
B	recG	ruvA	GO:0009314	1.87774	0.00907716	0.159334
B	recG	ruvA	GO:0009314	1.87774	0.00907716	0.159334
B	recR	ruvA	GO:0009314	1.87774	0.00907716	0.159334
B	recR	ruvA	GO:0009314	1.87774	0.00907716	0.159334
B	mnmG	radD	GO:0009411	1.90724	0.010101	0.149275
B	ada	groS	GO:0051301	1.72974	0.0185471	0.147924
B	aidB	bamA	GO:0051301	1.72974	0.0185471	0.147924
B	aidB	dnaK	GO:0051301	1.72974	0.0185471	0.147924
B	aidB	ftsK	GO:0051301	1.72974	0.0185471	0.147924
B	aidB	mukB	GO:0051301	1.72974	0.0185471	0.147924
B	aidB	murC	GO:0051301	1.72974	0.0185471	0.147924
B	aidB	murE	GO:0051301	1.72974	0.0185471	0.147924
B	aidB	nrdA	GO:0051301	1.72974	0.0185471	0.147924
B	aidB	yqgF	GO:0051301	1.72974	0.0185471	0.147924
B	alkB	mukF	GO:0051301	1.72974	0.0185471	0.147924
B	alkB	nrdB	GO:0051301	1.72974	0.0185471	0.147924
B	aroB	fic	GO:0051301	1.72974	0.0185471	0.147924
B	aroB	recJ	GO:0051301	1.72974	0.0185471	0.147924
B	aroB	rpe	GO:0051301	1.72974	0.0185471	0.147924
B	aroB	seqA	GO:0051301	1.72974	0.0185471	0.147924
B	asnC	hfq	GO:0051301	1.72974	0.0185471	0.147924
B	asnC	murC	GO:0051301	1.72974	0.0185471	0.147924
B	asnC	obgE	GO:0051301	1.72974	0.0185471	0.147924
B	asnC	recB	GO:0051301	1.72974	0.0185471	0.147924
B	atl	ftsN	GO:0051301	1.72974	0.0185471	0.147924
B	atl	mnmG	GO:0051301	1.72974	0.0185471	0.147924
B	atl	tag	GO:0051301	1.72974	0.0185471	0.147924
B	atl	yjeF	GO:0051301	1.72974	0.0185471	0.147924
B	bamA	bolA	GO:0051301	1.72974	0.0185471	0.147924
B	bamA	dnaG	GO:0051301	1.72974	0.0185471	0.147924
B	bolA	ftsL	GO:0051301	1.72974	0.0185471	0.147924
B	bolA	parE	GO:0051301	1.72974	0.0185471	0.147924
B	bolA	recA	GO:0051301	1.72974	0.0185471	0.147924
B	bolA	recB	GO:0051301	1.72974	0.0185471	0.147924
B	casA	ftsN	GO:0051301	1.72974	0.0185471	0.147924
B	casA	minE	GO:0051301	1.72974	0.0185471	0.147924
B	casA	parE	GO:0051301	1.72974	0.0185471	0.147924
B	casC	slmA	GO:0051301	1.72974	0.0185471	0.147924
B	casC	spoT	GO:0051301	1.72974	0.0185471	0.147924
B	casC	tatB	GO:0051301	1.72974	0.0185471	0.147924
B	casC	xerC	GO:0051301	1.72974	0.0185471	0.147924
B	casE	groS	GO:0051301	1.72974	0.0185471	0.147924
B	casE	grpE	GO:0051301	1.72974	0.0185471	0.147924
B	casE	recC	GO:0051301	1.72974	0.0185471	0.147924
B	casE	spoT	GO:0051301	1.72974	0.0185471	0.147924
B	casE	topA	GO:0051301	1.72974	0.0185471	0.147924
B	clpP	mutH	GO:0051301	1.72974	0.0185471	0.147924
B	clpP	recX	GO:0051301	1.72974	0.0185471	0.147924
B	clpP	tatB	GO:0051301	1.72974	0.0185471	0.147924
B	clpX	grpE	GO:0051301	1.72974	0.0185471	0.147924
B	clpX	topB	GO:0051301	1.72974	0.0185471	0.147924
B	clpX	vsr	GO:0051301	1.72974	0.0185471	0.147924
B	cspD	recB	GO:0051301	1.72974	0.0185471	0.147924
B	cspD	rpsF	GO:0051301	1.72974	0.0185471	0.147924
B	cyaY	paoB	GO:0051301	1.72974	0.0185471	0.147924
B	cyaY	recJ	GO:0051301	1.72974	0.0185471	0.147924
B	cyaY	topB	GO:0051301	1.72974	0.0185471	0.147924
B	dacB	groS	GO:0051301	1.72974	0.0185471	0.147924
B	dacB	hfq	GO:0051301	1.72974	0.0185471	0.147924
B	dacB	nlpI	GO:0051301	1.72974	0.0185471	0.147924
B	dacB	sbcD	GO:0051301	1.72974	0.0185471	0.147924
B	dacB	srmB	GO:0051301	1.72974	0.0185471	0.147924
B	dam	fis	GO:0051301	1.72974	0.0185471	0.147924
B	dam	fis	GO:0051301	1.72974	0.0185471	0.147924
B	dam	hfq	GO:0051301	1.72974	0.0185471	0.147924
B	dam	minC	GO:0051301	1.72974	0.0185471	0.147924
B	dam	minC	GO:0051301	1.72974	0.0185471	0.147924
B	dam	nlpI	GO:0051301	1.72974	0.0185471	0.147924
B	dam	nlpI	GO:0051301	1.72974	0.0185471	0.147924
B	dcm	groS	GO:0051301	1.72974	0.0185471	0.147924
B	dcm	hfq	GO:0051301	1.72974	0.0185471	0.147924
B	dcm	nlpI	GO:0051301	1.72974	0.0185471	0.147924
B	diaA	hfq	GO:0051301	1.72974	0.0185471	0.147924
B	dinJ	lpoA	GO:0051301	1.72974	0.0185471	0.147924
B	dinJ	nlpI	GO:0051301	1.72974	0.0185471	0.147924
B	dnaA	groS	GO:0051301	1.72974	0.0185471	0.147924
B	dnaA	gyrB	GO:0051301	1.72974	0.0185471	0.147924
B	dnaA	nrdA	GO:0051301	1.72974	0.0185471	0.147924
B	dnaA	recB	GO:0051301	1.72974	0.0185471	0.147924
B	dnaA	rpoD	GO:0051301	1.72974	0.0185471	0.147924
B	dnaE	dnaQ	GO:0051301	1.72974	0.0185471	0.147924
B	dnaE	ftsK	GO:0051301	1.72974	0.0185471	0.147924
B	dnaE	relE	GO:0051301	1.72974	0.0185471	0.147924
B	dnaE	ychN	GO:0051301	1.72974	0.0185471	0.147924
B	dnaE	zapA	GO:0051301	1.72974	0.0185471	0.147924
B	dnaG	pheS	GO:0051301	1.72974	0.0185471	0.147924
B	dnaG	priC	GO:0051301	1.72974	0.0185471	0.147924
B	dnaG	rsmD	GO:0051301	1.72974	0.0185471	0.147924
B	dnaG	yhbU	GO:0051301	1.72974	0.0185471	0.147924
B	dnaJ	holB	GO:0051301	1.72974	0.0185471	0.147924
B	dnaJ	mcrB	GO:0051301	1.72974	0.0185471	0.147924
B	dnaK	ispA	GO:0051301	1.72974	0.0185471	0.147924
B	dnaK	topA	GO:0051301	1.72974	0.0185471	0.147924
B	dnaN	dnaX	GO:0051301	1.72974	0.0185471	0.147924
B	dnaN	ftsX	GO:0051301	1.72974	0.0185471	0.147924
B	dnaN	groS	GO:0051301	1.72974	0.0185471	0.147924
B	dnaN	lpoA	GO:0051301	1.72974	0.0185471	0.147924
B	dnaN	nrdA	GO:0051301	1.72974	0.0185471	0.147924
B	dnaN	ruvA	GO:0051301	1.72974	0.0185471	0.147924
B	dnaQ	hfq	GO:0051301	1.72974	0.0185471	0.147924
B	dnaQ	minC	GO:0051301	1.72974	0.0185471	0.147924
B	dnaQ	priA	GO:0051301	1.72974	0.0185471	0.147924
B	dnaX	gyrA	GO:0051301	1.72974	0.0185471	0.147924
B	dnaX	holA	GO:0051301	1.72974	0.0185471	0.147924
B	dnaX	tag	GO:0051301	1.72974	0.0185471	0.147924
B	envC	holB	GO:0051301	1.72974	0.0185471	0.147924
B	era	fis	GO:0051301	1.72974	0.0185471	0.147924
B	fau	obgE	GO:0051301	1.72974	0.0185471	0.147924
B	fau	recC	GO:0051301	1.72974	0.0185471	0.147924
B	fetA	groS	GO:0051301	1.72974	0.0185471	0.147924
B	fetA	hfq	GO:0051301	1.72974	0.0185471	0.147924
B	fetA	recB	GO:0051301	1.72974	0.0185471	0.147924
B	fic	hfq	GO:0051301	1.72974	0.0185471	0.147924
B	fic	recB	GO:0051301	1.72974	0.0185471	0.147924
B	fis	tig	GO:0051301	1.72974	0.0185471	0.147924
B	ftsA	ftsZ	GO:0051301	1.72974	0.0185471	0.147924
B	ftsA	ftsZ	GO:0051301	1.72974	0.0185471	0.147924
B	ftsA	groL	GO:0051301	1.72974	0.0185471	0.147924
B	ftsA	groL	GO:0051301	1.72974	0.0185471	0.147924
B	ftsA	nlpI	GO:0051301	1.72974	0.0185471	0.147924
B	ftsA	nlpI	GO:0051301	1.72974	0.0185471	0.147924
B	ftsA	nrdA	GO:0051301	1.72974	0.0185471	0.147924
B	ftsA	obgE	GO:0051301	1.72974	0.0185471	0.147924
B	ftsA	parE	GO:0051301	1.72974	0.0185471	0.147924
B	ftsA	ruvA	GO:0051301	1.72974	0.0185471	0.147924
B	ftsA	ruvA	GO:0051301	1.72974	0.0185471	0.147924
B	ftsA	ydaW	GO:0051301	1.72974	0.0185471	0.147924
B	ftsH	recX	GO:0051301	1.72974	0.0185471	0.147924
B	ftsH	relE	GO:0051301	1.72974	0.0185471	0.147924
B	ftsH	sbcD	GO:0051301	1.72974	0.0185471	0.147924
B	ftsK	mreB	GO:0051301	1.72974	0.0185471	0.147924
B	ftsK	umuD	GO:0051301	1.72974	0.0185471	0.147924
B	ftsL	mnmG	GO:0051301	1.72974	0.0185471	0.147924
B	ftsL	nlpI	GO:0051301	1.72974	0.0185471	0.147924
B	ftsL	sbcB	GO:0051301	1.72974	0.0185471	0.147924
B	ftsL	yebV	GO:0051301	1.72974	0.0185471	0.147924
B	ftsN	groS	GO:0051301	1.72974	0.0185471	0.147924
B	ftsN	minD	GO:0051301	1.72974	0.0185471	0.147924
B	ftsN	minD	GO:0051301	1.72974	0.0185471	0.147924
B	ftsN	nrdF	GO:0051301	1.72974	0.0185471	0.147924
B	ftsN	rng	GO:0051301	1.72974	0.0185471	0.147924
B	ftsN	rppH	GO:0051301	1.72974	0.0185471	0.147924
B	ftsN	sbcB	GO:0051301	1.72974	0.0185471	0.147924
B	ftsN	srmB	GO:0051301	1.72974	0.0185471	0.147924
B	ftsN	topA	GO:0051301	1.72974	0.0185471	0.147924
B	ftsP	minC	GO:0051301	1.72974	0.0185471	0.147924
B	ftsP	minC	GO:0051301	1.72974	0.0185471	0.147924
B	ftsQ	ftsX	GO:0051301	1.72974	0.0185471	0.147924
B	ftsQ	ftsX	GO:0051301	1.72974	0.0185471	0.147924
B	ftsQ	murE	GO:0051301	1.72974	0.0185471	0.147924
B	ftsQ	yebV	GO:0051301	1.72974	0.0185471	0.147924
B	ftsW	srmB	GO:0051301	1.72974	0.0185471	0.147924
B	ftsY	yhhA	GO:0051301	1.72974	0.0185471	0.147924
B	ftsZ	minC	GO:0051301	1.72974	0.0185471	0.147924
B	ftsZ	minC	GO:0051301	1.72974	0.0185471	0.147924
B	groL	mutT	GO:0051301	1.72974	0.0185471	0.147924
B	groL	yhfG	GO:0051301	1.72974	0.0185471	0.147924
B	groS	gyrB	GO:0051301	1.72974	0.0185471	0.147924
B	groS	hfq	GO:0051301	1.72974	0.0185471	0.147924
B	groS	mukB	GO:0051301	1.72974	0.0185471	0.147924
B	groS	radA	GO:0051301	1.72974	0.0185471	0.147924
B	groS	recX	GO:0051301	1.72974	0.0185471	0.147924
B	groS	rpoD	GO:0051301	1.72974	0.0185471	0.147924
B	groS	yqgF	GO:0051301	1.72974	0.0185471	0.147924
B	grpE	rnt	GO:0051301	1.72974	0.0185471	0.147924
B	gyrB	recB	GO:0051301	1.72974	0.0185471	0.147924
B	gyrB	thyA	GO:0051301	1.72974	0.0185471	0.147924
B	helD	nlpI	GO:0051301	1.72974	0.0185471	0.147924
B	helD	recB	GO:0051301	1.72974	0.0185471	0.147924
B	hflK	topB	GO:0051301	1.72974	0.0185471	0.147924
B	hfq	iraD	GO:0051301	1.72974	0.0185471	0.147924
B	hfq	ligA	GO:0051301	1.72974	0.0185471	0.147924
B	hfq	marR	GO:0051301	1.72974	0.0185471	0.147924
B	hfq	murC	GO:0051301	1.72974	0.0185471	0.147924
B	hfq	rnhA	GO:0051301	1.72974	0.0185471	0.147924
B	hfq	sbcB	GO:0051301	1.72974	0.0185471	0.147924
B	hfq	ychN	GO:0051301	1.72974	0.0185471	0.147924
B	hfq	ydaW	GO:0051301	1.72974	0.0185471	0.147924
B	hfq	yhbQ	GO:0051301	1.72974	0.0185471	0.147924
B	hfq	yjjV	GO:0051301	1.72974	0.0185471	0.147924
B	holA	ruvC	GO:0051301	1.72974	0.0185471	0.147924
B	holA	sbcB	GO:0051301	1.72974	0.0185471	0.147924
B	holB	minC	GO:0051301	1.72974	0.0185471	0.147924
B	holB	recA	GO:0051301	1.72974	0.0185471	0.147924
B	holB	tatB	GO:0051301	1.72974	0.0185471	0.147924
B	holB	zipA	GO:0051301	1.72974	0.0185471	0.147924
B	holC	seqA	GO:0051301	1.72974	0.0185471	0.147924
B	holC	seqA	GO:0051301	1.72974	0.0185471	0.147924
B	hsdM	pinR	GO:0051301	1.72974	0.0185471	0.147924
B	hsdM	yqgF	GO:0051301	1.72974	0.0185471	0.147924
B	hupB	mukF	GO:0051301	1.72974	0.0185471	0.147924
B	iraD	recB	GO:0051301	1.72974	0.0185471	0.147924
B	ispA	minC	GO:0051301	1.72974	0.0185471	0.147924
B	ispA	mreB	GO:0051301	1.72974	0.0185471	0.147924
B	ispA	rng	GO:0051301	1.72974	0.0185471	0.147924
B	ligA	marA	GO:0051301	1.72974	0.0185471	0.147924
B	ligA	nlpI	GO:0051301	1.72974	0.0185471	0.147924
B	ligA	pheS	GO:0051301	1.72974	0.0185471	0.147924
B	ligA	recB	GO:0051301	1.72974	0.0185471	0.147924
B	ligA	ydaW	GO:0051301	1.72974	0.0185471	0.147924
B	lpoA	marR	GO:0051301	1.72974	0.0185471	0.147924
B	lpoA	relE	GO:0051301	1.72974	0.0185471	0.147924
B	lpoA	srmB	GO:0051301	1.72974	0.0185471	0.147924
B	marA	zapA	GO:0051301	1.72974	0.0185471	0.147924
B	marR	murE	GO:0051301	1.72974	0.0185471	0.147924
B	marR	sbcB	GO:0051301	1.72974	0.0185471	0.147924
B	marR	xerC	GO:0051301	1.72974	0.0185471	0.147924
B	mcrB	tig	GO:0051301	1.72974	0.0185471	0.147924
B	mcrB	topA	GO:0051301	1.72974	0.0185471	0.147924
B	mfd	nth	GO:0051301	1.72974	0.0185471	0.147924
B	mfd	recC	GO:0051301	1.72974	0.0185471	0.147924
B	mfd	rpoD	GO:0051301	1.72974	0.0185471	0.147924
B	mfd	tatB	GO:0051301	1.72974	0.0185471	0.147924
B	mfd	tatC	GO:0051301	1.72974	0.0185471	0.147924
B	mfd	xerC	GO:0051301	1.72974	0.0185471	0.147924
B	minC	ung	GO:0051301	1.72974	0.0185471	0.147924
B	minD	recF	GO:0051301	1.72974	0.0185471	0.147924
B	minD	recF	GO:0051301	1.72974	0.0185471	0.147924
B	minD	rppH	GO:0051301	1.72974	0.0185471	0.147924
B	minE	nrdA	GO:0051301	1.72974	0.0185471	0.147924
B	mnmE	murD	GO:0051301	1.72974	0.0185471	0.147924
B	mnmE	uvrA	GO:0051301	1.72974	0.0185471	0.147924
B	mnmG	mutH	GO:0051301	1.72974	0.0185471	0.147924
B	mnmG	radD	GO:0051301	1.72974	0.0185471	0.147924
B	mnmG	radD	GO:0051301	1.72974	0.0185471	0.147924
B	mnmG	rhlB	GO:0051301	1.72974	0.0185471	0.147924
B	mnmG	rpe	GO:0051301	1.72974	0.0185471	0.147924
B	mnmG	seqA	GO:0051301	1.72974	0.0185471	0.147924
B	mnmG	seqA	GO:0051301	1.72974	0.0185471	0.147924
B	mreB	murE	GO:0051301	1.72974	0.0185471	0.147924
B	mreB	phr	GO:0051301	1.72974	0.0185471	0.147924
B	mukB	ruvC	GO:0051301	1.72974	0.0185471	0.147924
B	mukB	ruvC	GO:0051301	1.72974	0.0185471	0.147924
B	mukB	sbcB	GO:0051301	1.72974	0.0185471	0.147924
B	mukF	nlpI	GO:0051301	1.72974	0.0185471	0.147924
B	mukF	ruvC	GO:0051301	1.72974	0.0185471	0.147924
B	mukF	uvrA	GO:0051301	1.72974	0.0185471	0.147924
B	mukF	ychN	GO:0051301	1.72974	0.0185471	0.147924
B	murC	yqgF	GO:0051301	1.72974	0.0185471	0.147924
B	murD	mutH	GO:0051301	1.72974	0.0185471	0.147924
B	murD	nrdF	GO:0051301	1.72974	0.0185471	0.147924
B	murE	murG	GO:0051301	1.72974	0.0185471	0.147924
B	murE	mutT	GO:0051301	1.72974	0.0185471	0.147924
B	murE	nrdA	GO:0051301	1.72974	0.0185471	0.147924
B	murE	topB	GO:0051301	1.72974	0.0185471	0.147924
B	murG	recX	GO:0051301	1.72974	0.0185471	0.147924
B	mutH	yebV	GO:0051301	1.72974	0.0185471	0.147924
B	mutT	recA	GO:0051301	1.72974	0.0185471	0.147924
B	mutT	ychN	GO:0051301	1.72974	0.0185471	0.147924
B	nlpI	nrdA	GO:0051301	1.72974	0.0185471	0.147924
B	nlpI	obgE	GO:0051301	1.72974	0.0185471	0.147924
B	nlpI	recF	GO:0051301	1.72974	0.0185471	0.147924
B	nlpI	recF	GO:0051301	1.72974	0.0185471	0.147924
B	nlpI	recX	GO:0051301	1.72974	0.0185471	0.147924
B	nlpI	rpoD	GO:0051301	1.72974	0.0185471	0.147924
B	nlpI	sbcB	GO:0051301	1.72974	0.0185471	0.147924
B	nlpI	yccS	GO:0051301	1.72974	0.0185471	0.147924
B	nlpI	yceA	GO:0051301	1.72974	0.0185471	0.147924
B	nlpI	ydaW	GO:0051301	1.72974	0.0185471	0.147924
B	nlpI	yhbQ	GO:0051301	1.72974	0.0185471	0.147924
B	nrdA	srmB	GO:0051301	1.72974	0.0185471	0.147924
B	nrdB	rnt	GO:0051301	1.72974	0.0185471	0.147924
B	nrdB	srmB	GO:0051301	1.72974	0.0185471	0.147924
B	nrdF	srmB	GO:0051301	1.72974	0.0185471	0.147924
B	nrdF	yjeF	GO:0051301	1.72974	0.0185471	0.147924
B	nudG	pheS	GO:0051301	1.72974	0.0185471	0.147924
B	obgE	recG	GO:0051301	1.72974	0.0185471	0.147924
B	obgE	rplI	GO:0051301	1.72974	0.0185471	0.147924
B	paoB	xseB	GO:0051301	1.72974	0.0185471	0.147924
B	parE	topA	GO:0051301	1.72974	0.0185471	0.147924
B	pheS	radA	GO:0051301	1.72974	0.0185471	0.147924
B	pheS	umuC	GO:0051301	1.72974	0.0185471	0.147924
B	phr	recB	GO:0051301	1.72974	0.0185471	0.147924
B	pinR	recA	GO:0051301	1.72974	0.0185471	0.147924
B	pinR	recG	GO:0051301	1.72974	0.0185471	0.147924
B	pinR	xerC	GO:0051301	1.72974	0.0185471	0.147924
B	priA	recB	GO:0051301	1.72974	0.0185471	0.147924
B	recA	recC	GO:0051301	1.72974	0.0185471	0.147924
B	recA	recC	GO:0051301	1.72974	0.0185471	0.147924
B	recA	slmA	GO:0051301	1.72974	0.0185471	0.147924
B	recA	topA	GO:0051301	1.72974	0.0185471	0.147924
B	recA	xerC	GO:0051301	1.72974	0.0185471	0.147924
B	recB	relB	GO:0051301	1.72974	0.0185471	0.147924
B	recB	rnt	GO:0051301	1.72974	0.0185471	0.147924
B	recB	tatB	GO:0051301	1.72974	0.0185471	0.147924
B	recB	thyA	GO:0051301	1.72974	0.0185471	0.147924
B	recB	thyA	GO:0051301	1.72974	0.0185471	0.147924
B	recB	umuC	GO:0051301	1.72974	0.0185471	0.147924
B	recB	umuD	GO:0051301	1.72974	0.0185471	0.147924
B	recB	vsr	GO:0051301	1.72974	0.0185471	0.147924
B	recB	yceA	GO:0051301	1.72974	0.0185471	0.147924
B	recB	yjjV	GO:0051301	1.72974	0.0185471	0.147924
B	recC	recF	GO:0051301	1.72974	0.0185471	0.147924
B	recC	recF	GO:0051301	1.72974	0.0185471	0.147924
B	recC	relE	GO:0051301	1.72974	0.0185471	0.147924
B	recC	rpoD	GO:0051301	1.72974	0.0185471	0.147924
B	recC	rpoZ	GO:0051301	1.72974	0.0185471	0.147924
B	recC	tatB	GO:0051301	1.72974	0.0185471	0.147924
B	recG	ruvA	GO:0051301	1.72974	0.0185471	0.147924
B	recG	ruvA	GO:0051301	1.72974	0.0185471	0.147924
B	recG	srmB	GO:0051301	1.72974	0.0185471	0.147924
B	recJ	rsmD	GO:0051301	1.72974	0.0185471	0.147924
B	recR	ruvA	GO:0051301	1.72974	0.0185471	0.147924
B	recR	ruvA	GO:0051301	1.72974	0.0185471	0.147924
B	recX	sbcD	GO:0051301	1.72974	0.0185471	0.147924
B	relE	xerC	GO:0051301	1.72974	0.0185471	0.147924
B	rep	srmB	GO:0051301	1.72974	0.0185471	0.147924
B	rlmL	sbcD	GO:0051301	1.72974	0.0185471	0.147924
B	rnt	sbcD	GO:0051301	1.72974	0.0185471	0.147924
B	rpe	rpoD	GO:0051301	1.72974	0.0185471	0.147924
B	rpe	rpsF	GO:0051301	1.72974	0.0185471	0.147924
B	rpe	thyA	GO:0051301	1.72974	0.0185471	0.147924
B	rpe	uvrA	GO:0051301	1.72974	0.0185471	0.147924
B	rpoD	srmB	GO:0051301	1.72974	0.0185471	0.147924
B	rpoD	xerC	GO:0051301	1.72974	0.0185471	0.147924
B	rpoZ	slmA	GO:0051301	1.72974	0.0185471	0.147924
B	rpoZ	topA	GO:0051301	1.72974	0.0185471	0.147924
B	rpoZ	zapA	GO:0051301	1.72974	0.0185471	0.147924
B	ruvA	ychN	GO:0051301	1.72974	0.0185471	0.147924
B	ruvC	yoaA	GO:0051301	1.72974	0.0185471	0.147924
B	sbcD	umuD	GO:0051301	1.72974	0.0185471	0.147924
B	skp	topB	GO:0051301	1.72974	0.0185471	0.147924
B	srmB	tatC	GO:0051301	1.72974	0.0185471	0.147924
B	srmB	topB	GO:0051301	1.72974	0.0185471	0.147924
B	srmB	ung	GO:0051301	1.72974	0.0185471	0.147924
B	srmB	ybcN	GO:0051301	1.72974	0.0185471	0.147924
B	srmB	yhhA	GO:0051301	1.72974	0.0185471	0.147924
B	srmB	yjeF	GO:0051301	1.72974	0.0185471	0.147924
B	srmB	yjjV	GO:0051301	1.72974	0.0185471	0.147924
B	tig	ung	GO:0051301	1.72974	0.0185471	0.147924
B	tig	yoaA	GO:0051301	1.72974	0.0185471	0.147924
B	tig	yqgF	GO:0051301	1.72974	0.0185471	0.147924
B	tsaE	ybcN	GO:0051301	1.72974	0.0185471	0.147924
B	umuC	ung	GO:0051301	1.72974	0.0185471	0.147924
B	uvrA	ybcN	GO:0051301	1.72974	0.0185471	0.147924
B	ychN	yebV	GO:0051301	1.72974	0.0185471	0.147924
B	yebV	zapA	GO:0051301	1.72974	0.0185471	0.147924
B	ada	groS	GO:0051607	1.58893	0.0353357	0.232783
B	aidB	bamA	GO:0051607	1.58893	0.0353357	0.232783
B	aidB	dnaK	GO:0051607	1.58893	0.0353357	0.232783
B	aidB	ftsK	GO:0051607	1.58893	0.0353357	0.232783
B	aidB	mukB	GO:0051607	1.58893	0.0353357	0.232783
B	aidB	murC	GO:0051607	1.58893	0.0353357	0.232783
B	aidB	murE	GO:0051607	1.58893	0.0353357	0.232783
B	aidB	nrdA	GO:0051607	1.58893	0.0353357	0.232783
B	aidB	yqgF	GO:0051607	1.58893	0.0353357	0.232783
B	alkB	mukF	GO:0051607	1.58893	0.0353357	0.232783
B	alkB	nrdB	GO:0051607	1.58893	0.0353357	0.232783
B	aroB	fic	GO:0051607	1.58893	0.0353357	0.232783
B	aroB	recJ	GO:0051607	1.58893	0.0353357	0.232783
B	aroB	rpe	GO:0051607	1.58893	0.0353357	0.232783
B	aroB	seqA	GO:0051607	1.58893	0.0353357	0.232783
B	asnC	hfq	GO:0051607	1.58893	0.0353357	0.232783
B	asnC	murC	GO:0051607	1.58893	0.0353357	0.232783
B	asnC	obgE	GO:0051607	1.58893	0.0353357	0.232783
B	asnC	recB	GO:0051607	1.58893	0.0353357	0.232783
B	atl	ftsN	GO:0051607	1.58893	0.0353357	0.232783
B	atl	mnmG	GO:0051607	1.58893	0.0353357	0.232783
B	atl	tag	GO:0051607	1.58893	0.0353357	0.232783
B	atl	yjeF	GO:0051607	1.58893	0.0353357	0.232783
B	bamA	bolA	GO:0051607	1.58893	0.0353357	0.232783
B	bamA	dnaG	GO:0051607	1.58893	0.0353357	0.232783
B	bolA	ftsL	GO:0051607	1.58893	0.0353357	0.232783
B	bolA	parE	GO:0051607	1.58893	0.0353357	0.232783
B	bolA	recA	GO:0051607	1.58893	0.0353357	0.232783
B	bolA	recB	GO:0051607	1.58893	0.0353357	0.232783
B	casA	ftsN	GO:0051607	1.58893	0.0353357	0.232783
B	casA	minE	GO:0051607	1.58893	0.0353357	0.232783
B	casA	parE	GO:0051607	1.58893	0.0353357	0.232783
B	casC	slmA	GO:0051607	1.58893	0.0353357	0.232783
B	casC	spoT	GO:0051607	1.58893	0.0353357	0.232783
B	casC	tatB	GO:0051607	1.58893	0.0353357	0.232783
B	casC	xerC	GO:0051607	1.58893	0.0353357	0.232783
B	casD	dnaK	GO:0051607	1.58893	0.0353357	0.232783
B	casE	groS	GO:0051607	1.58893	0.0353357	0.232783
B	casE	grpE	GO:0051607	1.58893	0.0353357	0.232783
B	casE	recC	GO:0051607	1.58893	0.0353357	0.232783
B	casE	spoT	GO:0051607	1.58893	0.0353357	0.232783
B	casE	topA	GO:0051607	1.58893	0.0353357	0.232783
B	clpP	mutH	GO:0051607	1.58893	0.0353357	0.232783
B	clpP	recX	GO:0051607	1.58893	0.0353357	0.232783
B	clpP	tatB	GO:0051607	1.58893	0.0353357	0.232783
B	clpX	grpE	GO:0051607	1.58893	0.0353357	0.232783
B	clpX	topB	GO:0051607	1.58893	0.0353357	0.232783
B	clpX	vsr	GO:0051607	1.58893	0.0353357	0.232783
B	cspD	recB	GO:0051607	1.58893	0.0353357	0.232783
B	cspD	rpsF	GO:0051607	1.58893	0.0353357	0.232783
B	cyaY	paoB	GO:0051607	1.58893	0.0353357	0.232783
B	cyaY	recJ	GO:0051607	1.58893	0.0353357	0.232783
B	cyaY	topB	GO:0051607	1.58893	0.0353357	0.232783
B	dacB	groS	GO:0051607	1.58893	0.0353357	0.232783
B	dacB	hfq	GO:0051607	1.58893	0.0353357	0.232783
B	dacB	nlpI	GO:0051607	1.58893	0.0353357	0.232783
B	dacB	sbcD	GO:0051607	1.58893	0.0353357	0.232783
B	dacB	srmB	GO:0051607	1.58893	0.0353357	0.232783
B	dam	fis	GO:0051607	1.58893	0.0353357	0.232783
B	dam	hfq	GO:0051607	1.58893	0.0353357	0.232783
B	dam	minC	GO:0051607	1.58893	0.0353357	0.232783
B	dam	nlpI	GO:0051607	1.58893	0.0353357	0.232783
B	dcm	groS	GO:0051607	1.58893	0.0353357	0.232783
B	dcm	hfq	GO:0051607	1.58893	0.0353357	0.232783
B	dcm	nlpI	GO:0051607	1.58893	0.0353357	0.232783
B	diaA	hfq	GO:0051607	1.58893	0.0353357	0.232783
B	dinJ	lpoA	GO:0051607	1.58893	0.0353357	0.232783
B	dinJ	nlpI	GO:0051607	1.58893	0.0353357	0.232783
B	dnaA	groS	GO:0051607	1.58893	0.0353357	0.232783
B	dnaA	gyrB	GO:0051607	1.58893	0.0353357	0.232783
B	dnaA	nrdA	GO:0051607	1.58893	0.0353357	0.232783
B	dnaA	recB	GO:0051607	1.58893	0.0353357	0.232783
B	dnaA	rpoD	GO:0051607	1.58893	0.0353357	0.232783
B	dnaE	dnaQ	GO:0051607	1.58893	0.0353357	0.232783
B	dnaE	ftsK	GO:0051607	1.58893	0.0353357	0.232783
B	dnaE	relE	GO:0051607	1.58893	0.0353357	0.232783
B	dnaE	ychN	GO:0051607	1.58893	0.0353357	0.232783
B	dnaE	zapA	GO:0051607	1.58893	0.0353357	0.232783
B	dnaG	pheS	GO:0051607	1.58893	0.0353357	0.232783
B	dnaG	priC	GO:0051607	1.58893	0.0353357	0.232783
B	dnaG	rsmD	GO:0051607	1.58893	0.0353357	0.232783
B	dnaG	yhbU	GO:0051607	1.58893	0.0353357	0.232783
B	dnaJ	holB	GO:0051607	1.58893	0.0353357	0.232783
B	dnaJ	mcrB	GO:0051607	1.58893	0.0353357	0.232783
B	dnaK	ispA	GO:0051607	1.58893	0.0353357	0.232783
B	dnaK	topA	GO:0051607	1.58893	0.0353357	0.232783
B	dnaN	dnaX	GO:0051607	1.58893	0.0353357	0.232783
B	dnaN	ftsX	GO:0051607	1.58893	0.0353357	0.232783
B	dnaN	groS	GO:0051607	1.58893	0.0353357	0.232783
B	dnaN	lpoA	GO:0051607	1.58893	0.0353357	0.232783
B	dnaN	nrdA	GO:0051607	1.58893	0.0353357	0.232783
B	dnaN	ruvA	GO:0051607	1.58893	0.0353357	0.232783
B	dnaQ	hfq	GO:0051607	1.58893	0.0353357	0.232783
B	dnaQ	minC	GO:0051607	1.58893	0.0353357	0.232783
B	dnaQ	priA	GO:0051607	1.58893	0.0353357	0.232783
B	dnaX	gyrA	GO:0051607	1.58893	0.0353357	0.232783
B	dnaX	holA	GO:0051607	1.58893	0.0353357	0.232783
B	dnaX	tag	GO:0051607	1.58893	0.0353357	0.232783
B	envC	holB	GO:0051607	1.58893	0.0353357	0.232783
B	era	fis	GO:0051607	1.58893	0.0353357	0.232783
B	fau	obgE	GO:0051607	1.58893	0.0353357	0.232783
B	fau	recC	GO:0051607	1.58893	0.0353357	0.232783
B	fetA	groS	GO:0051607	1.58893	0.0353357	0.232783
B	fetA	hfq	GO:0051607	1.58893	0.0353357	0.232783
B	fetA	recB	GO:0051607	1.58893	0.0353357	0.232783
B	fic	hfq	GO:0051607	1.58893	0.0353357	0.232783
B	fic	recB	GO:0051607	1.58893	0.0353357	0.232783
B	fis	tig	GO:0051607	1.58893	0.0353357	0.232783
B	ftsA	ftsZ	GO:0051607	1.58893	0.0353357	0.232783
B	ftsA	groL	GO:0051607	1.58893	0.0353357	0.232783
B	ftsA	nlpI	GO:0051607	1.58893	0.0353357	0.232783
B	ftsA	nrdA	GO:0051607	1.58893	0.0353357	0.232783
B	ftsA	obgE	GO:0051607	1.58893	0.0353357	0.232783
B	ftsA	parE	GO:0051607	1.58893	0.0353357	0.232783
B	ftsA	ruvA	GO:0051607	1.58893	0.0353357	0.232783
B	ftsA	ydaW	GO:0051607	1.58893	0.0353357	0.232783
B	ftsH	recX	GO:0051607	1.58893	0.0353357	0.232783
B	ftsH	relE	GO:0051607	1.58893	0.0353357	0.232783
B	ftsH	sbcD	GO:0051607	1.58893	0.0353357	0.232783
B	ftsK	mreB	GO:0051607	1.58893	0.0353357	0.232783
B	ftsK	umuD	GO:0051607	1.58893	0.0353357	0.232783
B	ftsL	mnmG	GO:0051607	1.58893	0.0353357	0.232783
B	ftsL	nlpI	GO:0051607	1.58893	0.0353357	0.232783
B	ftsL	sbcB	GO:0051607	1.58893	0.0353357	0.232783
B	ftsL	yebV	GO:0051607	1.58893	0.0353357	0.232783
B	ftsN	groS	GO:0051607	1.58893	0.0353357	0.232783
B	ftsN	minD	GO:0051607	1.58893	0.0353357	0.232783
B	ftsN	nrdF	GO:0051607	1.58893	0.0353357	0.232783
B	ftsN	rng	GO:0051607	1.58893	0.0353357	0.232783
B	ftsN	rppH	GO:0051607	1.58893	0.0353357	0.232783
B	ftsN	sbcB	GO:0051607	1.58893	0.0353357	0.232783
B	ftsN	srmB	GO:0051607	1.58893	0.0353357	0.232783
B	ftsN	topA	GO:0051607	1.58893	0.0353357	0.232783
B	ftsP	minC	GO:0051607	1.58893	0.0353357	0.232783
B	ftsQ	ftsX	GO:0051607	1.58893	0.0353357	0.232783
B	ftsQ	murE	GO:0051607	1.58893	0.0353357	0.232783
B	ftsQ	yebV	GO:0051607	1.58893	0.0353357	0.232783
B	ftsW	srmB	GO:0051607	1.58893	0.0353357	0.232783
B	ftsY	yhhA	GO:0051607	1.58893	0.0353357	0.232783
B	ftsZ	minC	GO:0051607	1.58893	0.0353357	0.232783
B	groL	mutT	GO:0051607	1.58893	0.0353357	0.232783
B	groL	yhfG	GO:0051607	1.58893	0.0353357	0.232783
B	groS	gyrB	GO:0051607	1.58893	0.0353357	0.232783
B	groS	hfq	GO:0051607	1.58893	0.0353357	0.232783
B	groS	mukB	GO:0051607	1.58893	0.0353357	0.232783
B	groS	radA	GO:0051607	1.58893	0.0353357	0.232783
B	groS	recX	GO:0051607	1.58893	0.0353357	0.232783
B	groS	rpoD	GO:0051607	1.58893	0.0353357	0.232783
B	groS	yqgF	GO:0051607	1.58893	0.0353357	0.232783
B	grpE	rnt	GO:0051607	1.58893	0.0353357	0.232783
B	gyrB	recB	GO:0051607	1.58893	0.0353357	0.232783
B	gyrB	thyA	GO:0051607	1.58893	0.0353357	0.232783
B	helD	nlpI	GO:0051607	1.58893	0.0353357	0.232783
B	helD	recB	GO:0051607	1.58893	0.0353357	0.232783
B	hflK	topB	GO:0051607	1.58893	0.0353357	0.232783
B	hfq	iraD	GO:0051607	1.58893	0.0353357	0.232783
B	hfq	ligA	GO:0051607	1.58893	0.0353357	0.232783
B	hfq	marR	GO:0051607	1.58893	0.0353357	0.232783
B	hfq	murC	GO:0051607	1.58893	0.0353357	0.232783
B	hfq	rnhA	GO:0051607	1.58893	0.0353357	0.232783
B	hfq	sbcB	GO:0051607	1.58893	0.0353357	0.232783
B	hfq	ychN	GO:0051607	1.58893	0.0353357	0.232783
B	hfq	ydaW	GO:0051607	1.58893	0.0353357	0.232783
B	hfq	yhbQ	GO:0051607	1.58893	0.0353357	0.232783
B	hfq	yjjV	GO:0051607	1.58893	0.0353357	0.232783
B	holA	ruvC	GO:0051607	1.58893	0.0353357	0.232783
B	holA	sbcB	GO:0051607	1.58893	0.0353357	0.232783
B	holB	minC	GO:0051607	1.58893	0.0353357	0.232783
B	holB	recA	GO:0051607	1.58893	0.0353357	0.232783
B	holB	tatB	GO:0051607	1.58893	0.0353357	0.232783
B	holB	zipA	GO:0051607	1.58893	0.0353357	0.232783
B	holC	seqA	GO:0051607	1.58893	0.0353357	0.232783
B	hsdM	pinR	GO:0051607	1.58893	0.0353357	0.232783
B	hsdM	yqgF	GO:0051607	1.58893	0.0353357	0.232783
B	hupB	mukF	GO:0051607	1.58893	0.0353357	0.232783
B	iraD	recB	GO:0051607	1.58893	0.0353357	0.232783
B	ispA	minC	GO:0051607	1.58893	0.0353357	0.232783
B	ispA	mreB	GO:0051607	1.58893	0.0353357	0.232783
B	ispA	rng	GO:0051607	1.58893	0.0353357	0.232783
B	ligA	marA	GO:0051607	1.58893	0.0353357	0.232783
B	ligA	nlpI	GO:0051607	1.58893	0.0353357	0.232783
B	ligA	pheS	GO:0051607	1.58893	0.0353357	0.232783
B	ligA	recB	GO:0051607	1.58893	0.0353357	0.232783
B	ligA	ydaW	GO:0051607	1.58893	0.0353357	0.232783
B	lpoA	marR	GO:0051607	1.58893	0.0353357	0.232783
B	lpoA	relE	GO:0051607	1.58893	0.0353357	0.232783
B	lpoA	srmB	GO:0051607	1.58893	0.0353357	0.232783
B	marA	zapA	GO:0051607	1.58893	0.0353357	0.232783
B	marR	murE	GO:0051607	1.58893	0.0353357	0.232783
B	marR	sbcB	GO:0051607	1.58893	0.0353357	0.232783
B	marR	xerC	GO:0051607	1.58893	0.0353357	0.232783
B	mcrB	tig	GO:0051607	1.58893	0.0353357	0.232783
B	mcrB	topA	GO:0051607	1.58893	0.0353357	0.232783
B	mfd	nth	GO:0051607	1.58893	0.0353357	0.232783
B	mfd	recC	GO:0051607	1.58893	0.0353357	0.232783
B	mfd	rpoD	GO:0051607	1.58893	0.0353357	0.232783
B	mfd	tatB	GO:0051607	1.58893	0.0353357	0.232783
B	mfd	tatC	GO:0051607	1.58893	0.0353357	0.232783
B	mfd	xerC	GO:0051607	1.58893	0.0353357	0.232783
B	minC	ung	GO:0051607	1.58893	0.0353357	0.232783
B	minD	recF	GO:0051607	1.58893	0.0353357	0.232783
B	minD	rppH	GO:0051607	1.58893	0.0353357	0.232783
B	minE	nrdA	GO:0051607	1.58893	0.0353357	0.232783
B	mnmE	murD	GO:0051607	1.58893	0.0353357	0.232783
B	mnmE	uvrA	GO:0051607	1.58893	0.0353357	0.232783
B	mnmG	mutH	GO:0051607	1.58893	0.0353357	0.232783
B	mnmG	radD	GO:0051607	1.58893	0.0353357	0.232783
B	mnmG	rhlB	GO:0051607	1.58893	0.0353357	0.232783
B	mnmG	rpe	GO:0051607	1.58893	0.0353357	0.232783
B	mnmG	seqA	GO:0051607	1.58893	0.0353357	0.232783
B	mreB	murE	GO:0051607	1.58893	0.0353357	0.232783
B	mreB	phr	GO:0051607	1.58893	0.0353357	0.232783
B	mukB	ruvC	GO:0051607	1.58893	0.0353357	0.232783
B	mukB	sbcB	GO:0051607	1.58893	0.0353357	0.232783
B	mukF	nlpI	GO:0051607	1.58893	0.0353357	0.232783
B	mukF	ruvC	GO:0051607	1.58893	0.0353357	0.232783
B	mukF	uvrA	GO:0051607	1.58893	0.0353357	0.232783
B	mukF	ychN	GO:0051607	1.58893	0.0353357	0.232783
B	murC	yqgF	GO:0051607	1.58893	0.0353357	0.232783
B	murD	mutH	GO:0051607	1.58893	0.0353357	0.232783
B	murD	nrdF	GO:0051607	1.58893	0.0353357	0.232783
B	murE	murG	GO:0051607	1.58893	0.0353357	0.232783
B	murE	mutT	GO:0051607	1.58893	0.0353357	0.232783
B	murE	nrdA	GO:0051607	1.58893	0.0353357	0.232783
B	murE	topB	GO:0051607	1.58893	0.0353357	0.232783
B	murG	recX	GO:0051607	1.58893	0.0353357	0.232783
B	mutH	yebV	GO:0051607	1.58893	0.0353357	0.232783
B	mutT	recA	GO:0051607	1.58893	0.0353357	0.232783
B	mutT	ychN	GO:0051607	1.58893	0.0353357	0.232783
B	nlpI	nrdA	GO:0051607	1.58893	0.0353357	0.232783
B	nlpI	obgE	GO:0051607	1.58893	0.0353357	0.232783
B	nlpI	recF	GO:0051607	1.58893	0.0353357	0.232783
B	nlpI	recX	GO:0051607	1.58893	0.0353357	0.232783
B	nlpI	rpoD	GO:0051607	1.58893	0.0353357	0.232783
B	nlpI	sbcB	GO:0051607	1.58893	0.0353357	0.232783
B	nlpI	yccS	GO:0051607	1.58893	0.0353357	0.232783
B	nlpI	yceA	GO:0051607	1.58893	0.0353357	0.232783
B	nlpI	ydaW	GO:0051607	1.58893	0.0353357	0.232783
B	nlpI	yhbQ	GO:0051607	1.58893	0.0353357	0.232783
B	nrdA	srmB	GO:0051607	1.58893	0.0353357	0.232783
B	nrdB	rnt	GO:0051607	1.58893	0.0353357	0.232783
B	nrdB	srmB	GO:0051607	1.58893	0.0353357	0.232783
B	nrdF	srmB	GO:0051607	1.58893	0.0353357	0.232783
B	nrdF	yjeF	GO:0051607	1.58893	0.0353357	0.232783
B	nudG	pheS	GO:0051607	1.58893	0.0353357	0.232783
B	obgE	recG	GO:0051607	1.58893	0.0353357	0.232783
B	obgE	rplI	GO:0051607	1.58893	0.0353357	0.232783
B	paoB	xseB	GO:0051607	1.58893	0.0353357	0.232783
B	parE	topA	GO:0051607	1.58893	0.0353357	0.232783
B	pheS	radA	GO:0051607	1.58893	0.0353357	0.232783
B	pheS	umuC	GO:0051607	1.58893	0.0353357	0.232783
B	phr	recB	GO:0051607	1.58893	0.0353357	0.232783
B	pinR	recA	GO:0051607	1.58893	0.0353357	0.232783
B	pinR	recG	GO:0051607	1.58893	0.0353357	0.232783
B	pinR	xerC	GO:0051607	1.58893	0.0353357	0.232783
B	priA	recB	GO:0051607	1.58893	0.0353357	0.232783
B	recA	recC	GO:0051607	1.58893	0.0353357	0.232783
B	recA	slmA	GO:0051607	1.58893	0.0353357	0.232783
B	recA	topA	GO:0051607	1.58893	0.0353357	0.232783
B	recA	xerC	GO:0051607	1.58893	0.0353357	0.232783
B	recB	relB	GO:0051607	1.58893	0.0353357	0.232783
B	recB	rnt	GO:0051607	1.58893	0.0353357	0.232783
B	recB	tatB	GO:0051607	1.58893	0.0353357	0.232783
B	recB	thyA	GO:0051607	1.58893	0.0353357	0.232783
B	recB	umuC	GO:0051607	1.58893	0.0353357	0.232783
B	recB	umuD	GO:0051607	1.58893	0.0353357	0.232783
B	recB	vsr	GO:0051607	1.58893	0.0353357	0.232783
B	recB	yceA	GO:0051607	1.58893	0.0353357	0.232783
B	recB	yjjV	GO:0051607	1.58893	0.0353357	0.232783
B	recC	recF	GO:0051607	1.58893	0.0353357	0.232783
B	recC	relE	GO:0051607	1.58893	0.0353357	0.232783
B	recC	rpoD	GO:0051607	1.58893	0.0353357	0.232783
B	recC	rpoZ	GO:0051607	1.58893	0.0353357	0.232783
B	recC	tatB	GO:0051607	1.58893	0.0353357	0.232783
B	recG	ruvA	GO:0051607	1.58893	0.0353357	0.232783
B	recG	srmB	GO:0051607	1.58893	0.0353357	0.232783
B	recJ	rsmD	GO:0051607	1.58893	0.0353357	0.232783
B	recR	ruvA	GO:0051607	1.58893	0.0353357	0.232783
B	recX	sbcD	GO:0051607	1.58893	0.0353357	0.232783
B	relE	xerC	GO:0051607	1.58893	0.0353357	0.232783
B	rep	srmB	GO:0051607	1.58893	0.0353357	0.232783
B	rlmL	sbcD	GO:0051607	1.58893	0.0353357	0.232783
B	rnt	sbcD	GO:0051607	1.58893	0.0353357	0.232783
B	rpe	rpoD	GO:0051607	1.58893	0.0353357	0.232783
B	rpe	rpsF	GO:0051607	1.58893	0.0353357	0.232783
B	rpe	thyA	GO:0051607	1.58893	0.0353357	0.232783
B	rpe	uvrA	GO:0051607	1.58893	0.0353357	0.232783
B	rpoD	srmB	GO:0051607	1.58893	0.0353357	0.232783
B	rpoD	xerC	GO:0051607	1.58893	0.0353357	0.232783
B	rpoZ	slmA	GO:0051607	1.58893	0.0353357	0.232783
B	rpoZ	topA	GO:0051607	1.58893	0.0353357	0.232783
B	rpoZ	zapA	GO:0051607	1.58893	0.0353357	0.232783
B	ruvA	ychN	GO:0051607	1.58893	0.0353357	0.232783
B	ruvC	yoaA	GO:0051607	1.58893	0.0353357	0.232783
B	sbcD	umuD	GO:0051607	1.58893	0.0353357	0.232783
B	skp	topB	GO:0051607	1.58893	0.0353357	0.232783
B	srmB	tatC	GO:0051607	1.58893	0.0353357	0.232783
B	srmB	topB	GO:0051607	1.58893	0.0353357	0.232783
B	srmB	ung	GO:0051607	1.58893	0.0353357	0.232783
B	srmB	ybcN	GO:0051607	1.58893	0.0353357	0.232783
B	srmB	yhhA	GO:0051607	1.58893	0.0353357	0.232783
B	srmB	yjeF	GO:0051607	1.58893	0.0353357	0.232783
B	srmB	yjjV	GO:0051607	1.58893	0.0353357	0.232783
B	tig	ung	GO:0051607	1.58893	0.0353357	0.232783
B	tig	yoaA	GO:0051607	1.58893	0.0353357	0.232783
B	tig	yqgF	GO:0051607	1.58893	0.0353357	0.232783
B	tsaE	ybcN	GO:0051607	1.58893	0.0353357	0.232783
B	umuC	ung	GO:0051607	1.58893	0.0353357	0.232783
B	uvrA	ybcN	GO:0051607	1.58893	0.0353357	0.232783
B	ychN	yebV	GO:0051607	1.58893	0.0353357	0.232783
B	yebV	zapA	GO:0051607	1.58893	0.0353357	0.232783
D	recA	symE	GO:0006302	1.87392	0.00518135	0.0881244
D	recA	symE	GO:0006302	1.87392	0.00518135	0.0881244
D	recA	symE	GO:0009432	2.05828	0.00606061	0.11384
D	recA	symE	GO:0009432	2.05828	0.00606061	0.11384
D	cho	ftsW	GO:0032153	1.84792	0.0096	0.140958
D	cho	zapA	GO:0032153	1.84792	0.0096	0.140958
D	damX	ftsL	GO:0032153	1.84792	0.0096	0.140958
D	dinG	ftsX	GO:0032153	1.84792	0.0096	0.140958
D	envC	ftsW	GO:0032153	1.84792	0.0096	0.140958
D	ftsB	zapA	GO:0032153	1.84792	0.0096	0.140958
D	ftsL	ruvB	GO:0032153	1.84792	0.0096	0.140958
D	ftsL	uvrD	GO:0032153	1.84792	0.0096	0.140958
D	ftsZ	uvrD	GO:0032153	1.84792	0.0096	0.140958
D	recA	symE	GO:0032153	1.84792	0.0096	0.140958
A	era	hflX	GO:0003924	2.01935	0	0.0263641
A	era	mnmE	GO:0003924	2.01935	0	0.0263641
C	ftsY	ftsZ	GO:0003924	2.01935	0	0.0263641
Notes:
Category A: 3,481 gene pairs (category A) defined by multiplicative as aggravating , whereas GP classified these interactions as non-interacting (close to neutrality or fell short below the chosen cut-off
Category B: 1614 gene pairs (category B) defined by multiplicative as non-interacting (either it was close to neutrality or fell short below the chosen cut-off), whereas GP classified these interactions as aggravating
Category C: List of 592 gene pairs (category c) defined by multiplicative as alleviating, whereas GP classified these interactions as non-interacting (either it was close to neutrality or fell short below the chosen cut-off
Category D: List of 2,459 gene pairs (category D) defined by multiplicative as aggravating (or close to neutrality) , whereas GP classified these interactions as alleviating

## Sheet: README
ReadMe: Column description in Sheet 1
Column headers	Remarks
Category	Disagreement GI gene pairs between multiplicative and GP definitions grouped them under various categories (based on Figs. 1C and D; see also Supplementary Table Sheets 2-5.
Gene1	Gene 1 in the GI pair
Gene2	Gene 2 in the GI pair
GO annotation	GI pairs sharing a similar enriched GO annotation ID.
Normalized GSEA enrichment score	Normalized enrichment score (NES), reflects the degree to which a gene set is overrepresented at the top or bottom of a ranked list of genes (based on fitness score).
P-value	The nominal p-value estimates the statistical significance of the enrichment score for a single gene set. Only GO annotations with a significance of p ≤ 0.05 is shown.
False discovery rate (FDR)	Estimated probability that a gene set with NES represents a false positive finding. FDR corrected p-value ≤ 0.05. Only GO terms with a significance of FDR ≤ 0.25 is shown.
